# Supplementary material
Source: PubMed Central journal article supplement (PMC4393440)

## SUPPLEMENTAL MATERIAL

**TABLE S1** Red soil sampling locations in this study.

**TABLE S2** Compositions of media used in this study for isolation and fermentation of red soil actinomycetes.

**TABLE S3** Distribution of the sequenced isolates at family and genus levels in different sampling locations.

**TABLE S4** OTUs and isolates that share <99% 16S rRNA gene sequence similarity with the nearest type strain.

**TABLE S5** Antimicrobial activities detected in representatives from different families and genera.

**TABLE S6** Information of the 107 selected isolates for secondary metabolite analysis.

**TABLE S7** Known secondary metabolites from the selected isolates.

**FIG S1** Maximum-likelihood trees based on 16S rRNA gene sequences, showing the phylogenetic positions of 13 ‘ambiguous’ *Streptomyces* OTUs sharing > 99% 16S rRNA gene sequence similarity with the nearest type strain. Bootstrap proportions of NJ (NJ-BP) and ML (ML-BP) analyses are shown above internodes before and after the backslash, respectively; posterior probabilities (PP) of Bayesian analyses ( $\geq 0.95$ ) are shown below internodes; only values above 50% are given. Bar, 0.01 substitutions per site. OTU13 and OTU9 each may represent two new lineages. \* indicated moderately acidophilic strains; \*\* indicated obligately acidophilic strains.

**APPENDIX S1** Chemical data and detailed structure elucidation of the novel secondary metabolites.

**TABLE S1** Red soil sampling locations in this study

| <b>Sampling location</b> | <b>GPS</b>        | <b>pH value</b> | <b>Collection time</b> | <b>Soil sample ID</b> |
|--------------------------|-------------------|-----------------|------------------------|-----------------------|
| <b>AU</b>                | 28°45'N; 115°49'E | 4.2-6.6         | 2007.08;<br>2009.09    | C1-C3;<br>D1-D3       |
| <b>LJZ</b>               | 28°15'N; 116°55'E | 4.9-5.2         | 2009.09                | L1-L5                 |
| <b>PYH</b>               | 29°07'N; 115°55'E | 4.8-6.2         | 2007.08                | P1-P5                 |
| <b>WS</b>                | 29°44'N; 115°37'E | 2.6-6.4         | 2007.08;<br>2009.09    | B1-B3;<br>W1-W3       |
| <b>XS</b>                | 28°57'N; 115°58'E | 4.7-5.0         | 2007.08                | X1-X5                 |
| <b>YL</b>                | 29°30'N; 117°33'E | 4.1-4.8         | 2007.08                | A1-A5                 |

**TABLE S2** Composition of media used in this study for isolation and fermentation of red soil actinomycetes

| Medium | Composition                                                                                                                                                                                                                                                                                                                                                                                                                                                                                                                                                                                                                                                                                                                                            |
|--------|--------------------------------------------------------------------------------------------------------------------------------------------------------------------------------------------------------------------------------------------------------------------------------------------------------------------------------------------------------------------------------------------------------------------------------------------------------------------------------------------------------------------------------------------------------------------------------------------------------------------------------------------------------------------------------------------------------------------------------------------------------|
| M1     | HV agar (Humic acid 1.0 g, NaH <sub>2</sub> PO <sub>4</sub> 0.5 g, MgSO <sub>4</sub> ·7H <sub>2</sub> O 0.5 g, CaCO <sub>3</sub> 0.02 g, KCl 1.7 g, FeSO <sub>4</sub> ·7H <sub>2</sub> O 0.018 g, B-vitamin solution 1 ml, agar 15.0 g, distilled water 1000 ml, pH 5.0-5.5)                                                                                                                                                                                                                                                                                                                                                                                                                                                                           |
| M2     | HVG (Humic acid 1.0 g, NaH <sub>2</sub> PO <sub>4</sub> 0.5 g, MgSO <sub>4</sub> ·7H <sub>2</sub> O 0.5 g, CaCO <sub>3</sub> 0.02 g, KCl 1.7 g, FeSO <sub>4</sub> ·7H <sub>2</sub> O 0.018 g, B-vitamin solution 1 ml, gellan gum 15.0 g, distilled water 1000 ml, pH 5.0-5.5)                                                                                                                                                                                                                                                                                                                                                                                                                                                                         |
| M3     | C agar (D-sucrose 10.0 g, L-glutamic acid 1.0 g, L-asparagines 1.0 g, MgSO <sub>4</sub> ·7H <sub>2</sub> O 0.05 g, FeSO <sub>4</sub> ·7 H <sub>2</sub> O 0.01 g, CaCO <sub>3</sub> 0.02 g, K <sub>2</sub> HPO <sub>4</sub> 2.0 g, agar 20.0 g, distilled water 1000 ml, pH 5.0-5.5)                                                                                                                                                                                                                                                                                                                                                                                                                                                                    |
| M4     | Modified ISP9 (xylose 10.0 g, FeSO <sub>4</sub> ·7H <sub>2</sub> O 0.001 g, MnCl <sub>2</sub> ·4H <sub>2</sub> O 0.001 g, ZnSO <sub>4</sub> 0.001 g, agar 15.0 g, distilled water 1000 ml, pH 5.0-5.5)                                                                                                                                                                                                                                                                                                                                                                                                                                                                                                                                                 |
| M5     | Minimal medium (L-asparagine 0.5 g, K <sub>2</sub> HPO <sub>4</sub> 0.5 g, MgSO <sub>4</sub> ·7H <sub>2</sub> O 0.2 g, FeSO <sub>4</sub> ·7H <sub>2</sub> O 0.01 g, glucose 10.0 g, agar 15.0 g, distilled water 1000 ml, pH 5.0-5.5 )                                                                                                                                                                                                                                                                                                                                                                                                                                                                                                                 |
| M6     | GTV (soil extract 500 ml, CaCl <sub>2</sub> 0.33 g, gellan gum 15.0 g, distilled water 1000 ml, pH 5.0-5.5)                                                                                                                                                                                                                                                                                                                                                                                                                                                                                                                                                                                                                                            |
| M7     | Modified starch casein agar (soluble starch 10.0 g, mannose 0.3 g, casein 0.3 g, KNO <sub>3</sub> 2.0 g, MgSO <sub>4</sub> ·7H <sub>2</sub> O 0.05 g, FeSO <sub>4</sub> ·7H <sub>2</sub> O 0.01 g, K <sub>2</sub> HPO <sub>4</sub> 2.0 g, CaCO <sub>3</sub> 0.02 g, NaCl 2.0 g, agar 15.0 g, distilled water 1000 ml, pH 5.0-5.5)                                                                                                                                                                                                                                                                                                                                                                                                                      |
| M8     | A+B mixed medium [(Solutions A: glucose 4.0 g, Difcoyeast extract 2.0 g and 18.0 g agar, distilled water 500 ml; Solution B: (NH <sub>4</sub> ) <sub>2</sub> SO <sub>4</sub> 2.0 g, K <sub>2</sub> HPO <sub>4</sub> 0.5 g, MgSO <sub>4</sub> ·7H <sub>2</sub> O 0.5 g, KCl 0.1 g, distilled water 500 ml, pH 5.0-5.5]                                                                                                                                                                                                                                                                                                                                                                                                                                  |
| M9     | Modified mineral-medium (sorbitol 5.0 g, K <sub>2</sub> HPO <sub>4</sub> 1.0 g, KH <sub>2</sub> PO <sub>4</sub> 0.7 g, NH <sub>4</sub> Cl 0.2 g, MgSO <sub>4</sub> ·7H <sub>2</sub> O 0.03 g, CaCl <sub>2</sub> · H <sub>2</sub> O 0.067 g, NaHCO <sub>3</sub> 0.3 g, CuCl <sub>2</sub> · H <sub>2</sub> O 55 µg, ZnCl <sub>2</sub> 150 µg, NiCl <sub>2</sub> · 6 H <sub>2</sub> O 20 µg, FeSO <sub>4</sub> ·7 H <sub>2</sub> O 880 µg, MnCl <sub>2</sub> · 4 H <sub>2</sub> O 280 µg, Al <sub>2</sub> (SO <sub>4</sub> ) <sub>3</sub> ·18 H <sub>2</sub> O 135 µg, CoCl <sub>2</sub> · 6 H <sub>2</sub> O 55 µg, NaMoO <sub>4</sub> ·2H <sub>2</sub> O 30 µg, H <sub>3</sub> BO <sub>3</sub> 50 µg, agar 15.0 g, distilled water 1000 ml, pH 5.0-5.5) |
| M10    | Chitin medium (KH <sub>2</sub> PO <sub>4</sub> 0.3 g, K <sub>2</sub> HPO <sub>4</sub> 0.7 g, FeSO <sub>4</sub> ·7H <sub>2</sub> O 0.015 g, MgSO <sub>4</sub> ·7H <sub>2</sub> O 0.5 g, ZnSO <sub>4</sub> ·7H <sub>2</sub> O 0.002 g, 40 ml 5% colloidal chitin, agar 15.0 g, distilled water 960 ml, pH 5.0-5.5)                                                                                                                                                                                                                                                                                                                                                                                                                                       |
| M11    | GYM (yeast extract 4.0 g, malt extract 10.0 g, glucose 4.0 g, CaCO <sub>3</sub> 2.0 g, agar 15.0-20.0 g, distilled water 1000 ml, pH 5.0-5.5)                                                                                                                                                                                                                                                                                                                                                                                                                                                                                                                                                                                                          |
| M12    | MOSY (mannitol 10.0 g, oatmeal 5.0 g, soy peptone 5.0 g, yeast extract 2.0 g, NaCl 2.0 g, KH <sub>2</sub> PO <sub>4</sub> 0.5 g, MgSO <sub>4</sub> ·7H <sub>2</sub> O 0.5 g, trace element solution 2.0 ml, agar 20.0 g, distilled water 1000 ml, pH 7.2, pH 5.0-5.5)<br>Trace element solution: ZnSO <sub>4</sub> ·7H <sub>2</sub> O 1.0 g, FeSO <sub>4</sub> ·7H <sub>2</sub> O 1.0 g, MnCl <sub>2</sub> ·4H <sub>2</sub> O 1.0 g, CuSO <sub>4</sub> ·5H <sub>2</sub> O 1.0 g, Na <sub>2</sub> B <sub>4</sub> O <sub>7</sub> ·10H <sub>2</sub> O 1.0 g, (NH <sub>4</sub> ) <sub>6</sub> Mo <sub>7</sub> O <sub>24</sub> ·4H <sub>2</sub> O 1.0 g, distilled water 1000 ml, pH 5.0-5.5)                                                               |
| M13    | SGG (potato starch 10 g, glucose 10 g, glycerol 10 g, corn steep powder 2.5 g, peptone 5 g, yeast extract 2 g, NaCl 1 g, CaCO <sub>3</sub> 3 g, agar 20.0 g, tap water 1000 ml, pH 5.0-5.5)                                                                                                                                                                                                                                                                                                                                                                                                                                                                                                                                                            |

**TABLE S3** Distribution of the sequenced isolates at family and genus levels in different sampling locations

| Orders <sup>a</sup>        | Family/Genus <sup>a</sup> | No. of isolates |     |     |    |    |    | Total      |
|----------------------------|---------------------------|-----------------|-----|-----|----|----|----|------------|
|                            |                           | AU              | LJZ | PYH | WS | XS | YL |            |
| <i>Catenulisporales</i>    | <i>Catenulisporaceae</i>  |                 |     |     |    |    |    | <b>5</b>   |
|                            | <i>Catenulispora</i>      |                 | 3   |     | 2  |    |    | 5          |
| <i>Corynebacteriales</i>   | <i>Mycobacteriaceae</i>   |                 |     |     |    |    |    | <b>2</b>   |
|                            | <i>Mycobacterium</i>      |                 | 2   |     |    |    |    | 2          |
|                            | <i>Nocardiaceae</i>       |                 |     |     |    |    |    | <b>20</b>  |
|                            | <i>Nocardia</i>           | 2               | 7   |     |    |    | 10 | 19         |
|                            | <i>Williamsia</i>         |                 | 1   |     |    |    |    | 1          |
|                            | <i>Tsukamurellaceae</i>   |                 |     |     |    |    |    | <b>1</b>   |
|                            | <i>Tsukamurella</i>       |                 | 1   |     |    |    |    | 1          |
| <i>Micromonosporales</i>   | <i>Micromonosporaceae</i> |                 |     |     |    |    |    | <b>27</b>  |
|                            | <i>Dactylosporangium</i>  |                 | 1   |     |    | 1  |    | 2          |
|                            | <i>Micromonospora</i>     | 12              | 8   |     | 3  | 2  |    | 25         |
| <i>Propionibacteriales</i> | <i>Nocardioidaceae</i>    |                 |     |     |    |    |    | <b>4</b>   |
|                            | <i>Kribella</i>           |                 | 1   | 2   |    |    |    | 3          |
|                            | <i>Marmoricola</i>        |                 | 1   |     |    |    |    | 1          |
| <i>Pseudonocardiales</i>   | <i>Pseudonocardiaceae</i> |                 |     |     |    |    |    | <b>20</b>  |
|                            | <i>Actinomycetospora</i>  |                 | 1   |     | 2  |    |    | 3          |
|                            | <i>Actinosynnema</i>      |                 | 1   |     |    |    |    | 1          |
|                            | <i>Amycolatopsis</i>      |                 | 3   | 2   | 2  |    | 1  | 8          |
|                            | <i>Pseudonocardia</i>     |                 | 1   |     | 1  |    |    | 2          |
|                            | <i>Lentzea</i>            | 1               | 1   | 1   |    |    |    | 3          |
|                            | <i>Saccharothrix</i>      |                 | 2   |     | 1  |    |    | 3          |
| <i>Streptomycetales</i>    | <i>Streptomycetaceae</i>  |                 |     |     |    |    |    | <b>213</b> |

|                                   |                                    |           |            |           |           |           |           |            |
|-----------------------------------|------------------------------------|-----------|------------|-----------|-----------|-----------|-----------|------------|
|                                   | <i>Streptacidiphilus</i>           |           |            |           | 4         |           | 1         | 5          |
|                                   | <i>Streptomyces</i>                | 46        | 77         | 28        | 29        | 7         | 21        | 208        |
| <b><i>Streptosporangiales</i></b> | <b><i>Streptosporangiaceae</i></b> |           |            |           |           |           |           | <b>42</b>  |
|                                   | <i>Microbispora</i>                | 3         | 5          |           | 2         |           |           | 10         |
|                                   | <i>Microtetraspora</i>             |           | 1          |           |           |           | 1         | 1          |
|                                   | <i>Nonomuraea</i>                  | 2         | 10         |           | 3         |           |           | 15         |
|                                   | <i>Plantotraspora</i>              | 1         |            |           |           |           |           | 1          |
|                                   | <i>Sphaerisporangium</i>           |           | 1          |           |           |           |           | 1          |
|                                   | <i>Streptosporangium</i>           |           | 12         |           | 1         |           |           | 13         |
|                                   | <b><i>Thermomonosporaceae</i></b>  |           |            |           |           |           |           | <b>24</b>  |
|                                   | <i>Actinoallomurus</i>             |           | 13         |           |           |           |           | 13         |
|                                   | <i>Actinocorallia</i>              |           | 1          |           |           |           |           | 1          |
|                                   | <i>Actinomadura</i>                |           | 8          |           | 2         |           |           | 10         |
|                                   | <b>Total</b>                       | <b>67</b> | <b>162</b> | <b>33</b> | <b>52</b> | <b>10</b> | <b>34</b> | <b>358</b> |

<sup>a</sup> The assignment of strains to orders and families is based on the hierarchical classification of the phylum *Actinobacteria* in the second edition of *Bergey's Manual of Systematic Bacteriology* (Ludwig *et al.*, 2012).

**TABLE S4** OTUs and isolates that share < 99% 16S rRNA gene sequence similarity with the nearest type strain

| No. | OTU serial number | No. of lineages | No. of isolates | No. of antagonistic isolates | Representative isolate ID <sup>a, b</sup> | The most closely related species                                                              | 16S rRNA gene sequence similarity |
|-----|-------------------|-----------------|-----------------|------------------------------|-------------------------------------------|-----------------------------------------------------------------------------------------------|-----------------------------------|
| 1   | Singleton         | 1               | 1               | 0                            | FXJ1.1129*                                | <i>Actinomadura madurae</i>                                                                   | 96.20%                            |
| 2   | Singleton         | 1               | 1               | 0                            | FXJ1.556*                                 | <i>Actinomycetospora lutea</i>                                                                | 98.64%                            |
| 3   | Singleton         | 1               | 1               | 0                            | GTVL4-6*                                  | <i>Actinosynnema pretiosum</i> subsp. <i>auranticum</i> ;<br><i>Lechevalieria atacamensis</i> | 97.52%                            |
| 4   | Singleton         | 1               | 1               | 0                            | FXJ1.244*                                 | <i>Amycolatopsis bartoniae</i>                                                                | 97.14%                            |
| 5   | Singleton         | 1               | 1               | 0                            | FXJ1.274*                                 | <i>Amycolatopsis niigatensis</i>                                                              | 98.37%                            |
| 6   | OTU53             | 1               | 2               | 0                            | FXJ1.974                                  | <i>Dactylosporangiumarangshiense</i>                                                          | 98.89%                            |
| 7   | OTU57             | 1               | 2               | 1                            | FXJ1.034 <sup>T*</sup>                    | <i>Lentzea kentuckyensis</i>                                                                  | 98.50%                            |
| 8   | OTU37             | 3               | 2               | 2                            | FXJ1.457*                                 | <i>Microbispora hainanensis</i>                                                               | 98.83%                            |
|     |                   |                 | 1               | 0                            | FXJ1.1062                                 | <i>Microbispora amethystogenes</i>                                                            | 98.83%                            |
|     |                   |                 | 4               | 1                            | FXJ1.541*                                 | <i>Microbispora amethystogenes</i>                                                            | 98.50%                            |
| 9   | OTU30             | 1               | 1               | 0                            | FXJ1.477*                                 | <i>Microbispora rosea</i> subsp. <i>rosea</i>                                                 | 98.84%                            |
| 10  | OTU11             | 1               | 2               | 1                            | FXJ1.347*                                 | <i>Micromonospora eburnea</i>                                                                 | 98.90%                            |
| 11  | OTU24             | 1               | 3               | 0                            | FXJ1.353*                                 | <i>Micromonospora rhizosphaerae</i>                                                           | 98.88%                            |
| 12  | Singleton         | 1               | 1               | 0                            | FXJ1.1164*                                | <i>Mycobacterium duvalii</i>                                                                  | 98.75%                            |
| 13  | Singleton         | 1               | 1               | 0                            | FXJ1.077*                                 | <i>Nocardia jiangxiensis</i>                                                                  | 98.17%                            |
| 14  | OTU25             | 1               | 2               | 0                            | FXJ1.258*                                 | <i>Nocardia jiangxiensis</i>                                                                  | 98.81%                            |
| 15  | OTU66             | 1               | 3               | 1                            | FXJ1.011*                                 | <i>Nocardia ninae</i>                                                                         | 98.41%                            |
| 16  | OTU27             | 1               | 2               | 1                            | FXJ1.242*                                 | <i>Nocardia nova</i>                                                                          | 98.24%                            |
| 17  | Singleton         | 1               | 1               | 0                            | FXJ1.368*                                 | <i>Nonomuraea candida</i>                                                                     | 98.86%                            |
| 18  | Singleton         | 1               | 1               | 0                            | FXJ1.102 <sup>T*</sup>                    | <i>Nonomuraea candida</i>                                                                     | 98.86%                            |
| 19  | OTU26             | 2               | 1               | 0                            | FXJ1.958*                                 | <i>Nonomuraea spiralis</i>                                                                    | 98.89%                            |
|     |                   |                 | 1               | 0                            | FXJ1.998*                                 | <i>Nonomuraea candida</i>                                                                     | 98.90%                            |

|    |           |   |    |    |            |                                                          |        |
|----|-----------|---|----|----|------------|----------------------------------------------------------|--------|
| 20 | Singleton | 1 | 1  | 0  | FXJ1.482*  | <i>Pseudonocardia alaniniphila</i>                       | 98.68% |
| 21 | Singleton | 1 | 1  | 0  | FXJ1.271*  | <i>Streptacidiphilus anmyonensis</i>                     | 98.60% |
| 22 | OTU6      | 1 | 11 | 11 | FXJ1.725*  | <i>Streptomyces ferralitis</i>                           | 98.90% |
| 23 | Singleton | 1 | 1  | 0  | FXJ1.042   | <i>Streptomyces aureus</i>                               | 98.84% |
| 24 | OTU16     | 1 | 5  | 1  | FXJ1.238*  | <i>Streptomyces caeruleatus</i>                          | 98.75% |
| 25 | OTU15     | 1 | 3  | 1  | FXJ1.451*  | <i>Streptomyces caeruleatus</i>                          | 98.78% |
| 26 | Singleton | 1 | 1  | 0  | FXJ1.197   | <i>Streptomyces chromofuscus</i>                         | 97.73% |
| 27 | Singleton | 1 | 1  | 0  | FXJ1.139*  | <i>Streptomyces cocklensis</i>                           | 97.65% |
| 28 | Singleton | 1 | 1  | 0  | FXJ1.124** | <i>Streptomyces cocklensis</i>                           | 98.97% |
| 29 | Singleton | 1 | 1  | 0  | FXJ1.250   | <i>Streptomyces muensis</i>                              | 97.88% |
| 30 | OTU21     | 1 | 1  | 0  | FXJ1.467*  | <i>Streptomyces corchorusii</i>                          | 98.83% |
| 31 | OTU63     | 1 | 2  | 2  | FXJ1.978*  | <i>Streptomyces cuspidosporu</i>                         | 98.32% |
| 32 | OTU33     | 1 | 2  | 1  | FXJ1.460*  | <i>Streptomyces diastaticus</i> subsp. <i>ardesiacus</i> | 98.16% |
| 33 | Singleton | 1 | 1  | 1  | FXJ1.194   | <i>Streptomyces durhamensis</i>                          | 98.09% |
| 34 | Singleton | 1 | 1  | 0  | FXJ1.038   | <i>Streptomyces filipinensis</i>                         | 98.38% |
| 35 | Singleton | 1 | 1  | 0  | FXJ1.257** | <i>Streptomyces griseorubiginosus</i>                    | 98.62% |
| 36 | Singleton | 1 | 1  | 0  | FXJ1.255   | <i>Streptomyces caeruleatus</i>                          | 98.83% |
| 37 | Singleton | 1 | 1  | 0  | FXJ1.300** | <i>Streptomyces guanduensis</i>                          | 98.67% |
| 38 | OTU50     | 1 | 6  | 1  | FXJ1.1116  | <i>Streptomyces malachitofuscus</i>                      | 98.66% |
| 39 | OTU55     | 1 | 3  | 1  | FXJ1.517*  | <i>Streptomyces psammoticus</i>                          | 98.53% |
| 40 | Singleton | 1 | 1  | 0  | FXJ1.1162* | <i>Streptomyces psammoticus</i>                          | 98.69% |
| 41 | Singleton | 1 | 1  | 0  | FXJ1.056*  | <i>Streptomyces psammoticus</i>                          | 98.96% |
| 42 | Singleton | 1 | 1  | 0  | FXJ1.069*  | <i>Streptomyces rubidus</i>                              | 98.39% |
| 43 | Singleton | 1 | 1  | 1  | FXJ1.701   | <i>Streptomyces sanglieri</i>                            | 98.83% |
| 44 | OTU64     | 1 | 3  | 3  | FXJ1.434*  | <i>Streptomyces graminisoli</i>                          | 98.97% |
| 45 | OTU31     | 1 | 4  | 1  | FXJ1.470*  | <i>Streptomyces somaliensis</i>                          | 98.32% |

|              |           |           |            |           |                        |                                        |        |
|--------------|-----------|-----------|------------|-----------|------------------------|----------------------------------------|--------|
| 46           | Singleton | 1         | 1          | 0         | FXJ1.193 <sup>*</sup>  | <i>Streptomyces viridobrunneus</i>     | 98.46% |
| 47           | Singleton | 1         | 1          | 0         | FXJ1.461 <sup>*</sup>  | <i>Streptomyces yanglinensis</i>       | 98.74% |
| 48           | Singleton | 1         | 1          | 0         | GTVWS6G17 <sup>*</sup> | <i>Streptomyces scopuliridis</i>       | 98.33% |
| 49           | OTU23     | 3         | 4          | 0         | FXJ 1.973 <sup>*</sup> | <i>Streptosporangium album</i>         | 98.60% |
|              |           |           | 2          | 1         | FXJ1.1117 <sup>*</sup> | <i>Streptosporangium pseudovulgare</i> | 98.38% |
|              |           |           | 1          | 0         | FXJ1.986 <sup>*</sup>  | <i>Streptosporangium carneum</i>       | 98.89% |
| <b>Total</b> | <b>49</b> | <b>54</b> | <b>101</b> | <b>32</b> |                        |                                        |        |

<sup>a</sup>\*, moderately acidophilic strains; <sup>\*\*</sup>, obligately acidophilic strains.

<sup>b</sup> FXJ1.034<sup>T</sup> and FXJ1.102<sup>T</sup> have been proposed as type strains of *Lentzea jiangxiensis* sp. nov. and *Nonomuraea jiangxiensis* sp. nov., respectively (see Li *et al.*, 2012a,b).



**TABLE S5** Antimicrobial activities detected in representatives from different families and genera

| Family                      | Genus                    | No. of isolates           | No. of active isolates   | Percentage of active isolates |
|-----------------------------|--------------------------|---------------------------|--------------------------|-------------------------------|
| <i>Catenulisporaceae</i>    | <i>Catenulispora</i>     | 5 <sup>a</sup>            | 1 <sup>a</sup>           | 20.0%                         |
| <i>Mycobacteriaceae</i>     | <i>Mycobacterium</i>     | 2 <sup>a</sup>            | 0                        | 0.0%                          |
| <i>Nocardiaceae</i>         | <i>Nocardia</i>          | 19 <sup>a</sup>           | 2 <sup>a</sup>           | 10.5%                         |
|                             | <i>Williamsia</i>        | 1 <sup>a</sup>            | 0                        | 0.0%                          |
| <i>Tsukamurellaceae</i>     | <i>Tsukamurella</i>      | 1 <sup>a</sup>            | 0                        | 0.0%                          |
| <i>Micromonosporaceae</i>   | <i>Dactylosporangium</i> | 2 <sup>b</sup>            | 0                        | 0.0%                          |
|                             | <i>Micromonospora</i>    | 25 <sup>(23a+2b)</sup>    | 5 <sup>(4a+1b)</sup>     | 20.0%                         |
| <i>Nocardioideaceae</i>     | <i>Kribella</i>          | 3 <sup>a</sup>            | 0                        | 0.0%                          |
|                             | <i>Marmoricola</i>       | 1 <sup>a</sup>            | 0                        | 0.0%                          |
| <i>Pseudonocardiaceae</i>   | <i>Actinomycetospora</i> | 3 <sup>a</sup>            | 0                        | 0.0%                          |
|                             | <i>Actinosynnema</i>     | 1 <sup>a</sup>            | 0                        | 0.0%                          |
|                             | <i>Amycolatopsis</i>     | 8 <sup>a</sup>            | 3 <sup>a</sup>           | 37.5%                         |
|                             | <i>Pseudonocardia</i>    | 2 <sup>a</sup>            | 0                        | 0.0%                          |
|                             | <i>Lentzea</i>           | 3 <sup>(2a+1b)</sup>      | 1 <sup>a</sup>           | 33.3%                         |
|                             | <i>Saccharothrix</i>     | 3 <sup>a</sup>            | 1 <sup>a</sup>           | 33.3%                         |
| <i>Streptomycetaceae</i>    | <i>Streptacidiphilus</i> | 5 <sup>a</sup>            | 0                        | 0.0%                          |
|                             | <i>Streptomyces</i>      | 208 <sup>(127a+81b)</sup> | 112 <sup>(70a+42b)</sup> | 53.8%                         |
| <i>Streptosporangiaceae</i> | <i>Microbispora</i>      | 10 <sup>(9a+1b)</sup>     | 3 <sup>a</sup>           | 30.0%                         |
|                             | <i>Microtetraspora</i>   | 2 <sup>b</sup>            | 0                        | 0.0%                          |
|                             | <i>Nonomuraea</i>        | 15 <sup>(9a+6b)</sup>     | 2 <sup>(1a+1b)</sup>     | 13.3%                         |
|                             | <i>Plantotraspora</i>    | 1 <sup>a</sup>            | 0                        | 0.0%                          |
|                             | <i>Sphaerisporangium</i> | 1 <sup>a</sup>            | 0                        | 0.0%                          |
|                             | <i>Streptosporangium</i> | 13 <sup>a</sup>           | 7 <sup>a</sup>           | 53.8%                         |
| <i>Thermomonosporaceae</i>  | <i>Actinoallomurus</i>   | 13 <sup>a</sup>           | 0                        | 0.0%                          |
|                             | <i>Actinocorallia</i>    | 1 <sup>b</sup>            | 0                        | 0.0%                          |
|                             | <i>Actinomadura</i>      | 10 <sup>(8a+2b)</sup>     | 4 <sup>(3a+1b)</sup>     | 40.0%                         |
| <b>Total</b>                |                          | <b>358</b>                | <b>141</b>               | <b>39.4%</b>                  |

<sup>a</sup> Strains assigned to the acidophilic group.

<sup>b</sup> Strains assigned to the acidotolerant group.

<sup>c</sup> Figures indicate the number of strains.

**TABLE S6** Information of the 107 selected isolates for secondary metabolite analysis

| <b>Family</b>                                 | <b>Strain<sup>a,b</sup></b>                          | <b>Location</b>                               | <b>Bioactivity<sup>c</sup></b> |   |
|-----------------------------------------------|------------------------------------------------------|-----------------------------------------------|--------------------------------|---|
| <i>Catenulisporaceae</i>                      | <i>Catenulispora</i> sp. AL4G16 <sup>a</sup>         | LJZ                                           | Vc                             |   |
|                                               | <i>Catenulispora</i> sp. SCAWS2A <sup>a</sup>        | WS                                            | N                              |   |
| <i>Micromonosporaceae</i>                     | <i>Dactylosporangium</i> sp. FXJ1.262 <sup>†</sup>   | XS                                            | N                              |   |
|                                               | <i>Micromonospora</i> sp. FXJ1.144 <sup>a</sup>      | AU                                            | N                              |   |
|                                               | <i>Micromonospora</i> sp. FXJ1.347 <sup>a,†</sup>    | AU                                            | Af, Kp                         |   |
|                                               | <i>Micromonospora</i> sp. FXJ1.351 <sup>a,†</sup>    | AU                                            | N                              |   |
|                                               | <i>Micromonospora</i> sp. FXJ1.361 <sup>a</sup>      | AU                                            | Pa                             |   |
|                                               | <i>Micromonospora</i> sp. FXJ1.507 <sup>a</sup>      | LJZ                                           | N                              |   |
|                                               | <i>Nocardiaceae</i>                                  | <i>Nocardia</i> sp. FXJ1.009 <sup>a</sup>     | YL                             | N |
| <i>Nocardia</i> sp. FXJ1.010 <sup>a,†</sup>   |                                                      | YL                                            | N                              |   |
| <i>Nocardia</i> sp. FXJ1.016 <sup>a,†</sup>   |                                                      | YL                                            | N                              |   |
| <i>Nocardia</i> sp. FXJ1.516 <sup>a</sup>     |                                                      | LJZ                                           | N                              |   |
| <i>Williamsia</i> sp. FXJ1.547 <sup>a</sup>   |                                                      | LJZ                                           | N                              |   |
| <i>Pseudonocardiaceae</i>                     | <i>Actinosynnema</i> sp. GTVL4-6 <sup>a,†</sup>      | LJZ                                           | N                              |   |
|                                               | <i>Amycolatopsis</i> sp. FXJ1.244 <sup>a,†</sup>     | YL                                            | N                              |   |
|                                               | <i>Amycolatopsis</i> sp. FXJ1.274 <sup>a,†</sup>     | PYH                                           | Kp                             |   |
|                                               | <i>Amycolatopsis</i> sp. FXJ1.406 <sup>a</sup>       | LJZ                                           | Sa                             |   |
|                                               | <i>Amycolatopsis</i> sp. FXJ1.428 <sup>a</sup>       | WS                                            | N                              |   |
|                                               | <i>Amycolatopsis</i> sp. FXJ1.444 <sup>a</sup>       | WS                                            | N                              |   |
|                                               | <i>Amycolatopsis</i> sp. GTVL4-7 <sup>a</sup>        | LJZ                                           | N                              |   |
|                                               | <i>Actinomycetospora</i> sp. FXJ1.479 <sup>a</sup>   | WS                                            | N                              |   |
|                                               | <i>Actinomycetospora</i> sp. FXJ1.484 <sup>a</sup>   | WS                                            | N                              |   |
|                                               | <i>Lentzea jiangxiensis</i> FXJ1.034 <sup>Ta,†</sup> | AU                                            | Ca, Kp                         |   |
|                                               | <i>Pseudonocardia</i> sp. FXJ1.453 <sup>a</sup>      | WS                                            | N                              |   |
|                                               | <i>Saccharothrix</i> sp. FXJ1.021 <sup>a</sup>       | WS                                            | Ca, Kp, Sa                     |   |
|                                               | <i>Saccharothrix</i> sp. FXJ1.486 <sup>a</sup>       | LJZ                                           | N                              |   |
|                                               | <i>Streptomycetaceae</i>                             | <i>Streptomyces</i> sp. FXJ1.008 <sup>a</sup> | YL                             | N |
|                                               |                                                      | <i>Streptomyces</i> sp. FXJ1.013 <sup>†</sup> | YL                             | N |
| <i>Streptomyces</i> sp. FXJ1.019              |                                                      | YL                                            | N                              |   |
| <i>Streptomyces</i> sp. FXJ1.020              |                                                      | YL                                            | Pa, Sa                         |   |
| <i>Streptomyces</i> sp. FXJ1.029 <sup>a</sup> |                                                      | AU                                            | N                              |   |
| <i>Streptomyces</i> sp. FXJ1.030              |                                                      | AU                                            | Pa                             |   |
| <i>Streptomyces</i> sp. FXJ1.031 <sup>a</sup> |                                                      | AU                                            | N                              |   |
| <i>Streptomyces</i> sp. FXJ1.032 <sup>†</sup> |                                                      | AU                                            | Ca, Ec, Fo, Sa,                |   |
| <i>Streptomyces</i> sp. FXJ1.033              |                                                      | AU                                            | N                              |   |
| <i>Streptomyces</i> sp. FXJ1.040 <sup>a</sup> |                                                      | AU                                            | N                              |   |
| <i>Streptomyces</i> sp. FXJ1.042 <sup>†</sup> |                                                      | AU                                            | N                              |   |
| <i>Streptomyces</i> sp. FXJ1.044              |                                                      | YL                                            | Pa                             |   |
| <i>Streptomyces</i> sp. FXJ1.050 <sup>a</sup> |                                                      | AU                                            | Cp                             |   |
| <i>Streptomyces</i> sp. FXJ1.054 <sup>†</sup> |                                                      | AU                                            | N                              |   |
| <i>Streptomyces</i> sp. FXJ1.055 <sup>a</sup> |                                                      | AU                                            | Kp, Sa                         |   |

|                                                 |     |                                    |
|-------------------------------------------------|-----|------------------------------------|
| <i>Streptomyces</i> sp. FXJ1.060 <sup>a</sup>   | AU  | Sa                                 |
| <i>Streptomyces</i> sp. FXJ1.066                | AU  | N                                  |
| <i>Streptomyces</i> sp. FXJ1.068                | AU  | Af, Ca, Sa, Vc                     |
| <i>Streptomyces</i> sp. FXJ1.069 <sup>a,†</sup> | AU  | N                                  |
| <i>Streptomyces</i> sp. FXJ1.075 <sup>a</sup>   | AU  | Af, Ca, Fo, Sa                     |
| <i>Streptomyces</i> sp. FXJ1.076 <sup>a</sup>   | AU  | Af, Ca, Ec, Fo, Sa                 |
| <i>Streptomyces</i> sp. FXJ1.079 <sup>a,†</sup> | AU  | Sa                                 |
| <i>Streptomyces</i> sp. FXJ1.092 <sup>a</sup>   | AU  | Kp, Sa                             |
| <i>Streptomyces</i> sp. FXJ1.093 <sup>†</sup>   | AU  | Ec, Kp, Sa                         |
| <i>Streptomyces</i> sp. FXJ1.172 <sup>a</sup>   | XS  | Af, Ec, Sa                         |
| <i>Streptomyces</i> sp. FXJ1.234                | PYH | Af, Ca                             |
| <i>Streptomyces</i> sp. FXJ1.235 <sup>†</sup>   | PYH | Ec                                 |
| <i>Streptomyces</i> sp. FXJ1.238 <sup>a,†</sup> | PYH | Pa                                 |
| <i>Streptomyces</i> sp. FXJ1.249                | YL  | Ca, Ec, Sa                         |
| <i>Streptomyces</i> sp. FXJ1.250 <sup>†</sup>   | YL  | Fo                                 |
| <i>Streptomyces</i> sp. FXJ1.253 <sup>a</sup>   | AU  | Af, Ca, Ec, Fo, Sa, Vc             |
| <i>Streptomyces</i> sp. FXJ1.264                | YL  | Ec, Kp, Pa, Sa, Vc                 |
| <i>Streptomyces</i> sp. FXJ1.272                | PYH | N                                  |
| <i>Streptomyces</i> sp. FXJ1.275                | PYH | N                                  |
| <i>Streptomyces</i> sp. FXJ1.297 <sup>a,†</sup> | PYH | N                                  |
| <i>Streptomyces</i> sp. FXJ1.309                | XS  | Ca, Ec, Sa, Vc                     |
| <i>Streptomyces</i> sp. FXJ1.310                | XS  | Ca, Ec, Sa                         |
| <i>Streptomyces</i> sp. GA60                    | AU  | Ca, Kp, Pa, Vc                     |
| <i>Streptomyces</i> sp. FXJ1.401 <sup>a</sup>   | LJZ | Sa                                 |
| <i>Streptomyces</i> sp. FXJ1.407 <sup>a</sup>   | LJZ | Af, Ca, Sa                         |
| <i>Streptomyces</i> sp. FXJ1.408 <sup>a,†</sup> | LJZ | Af, Ca, Fo                         |
| <i>Streptomyces</i> sp. FXJ1.409 <sup>a</sup>   | LJZ | Ca, Cp, Sa                         |
| <i>Streptomyces</i> sp. FXJ1.414 <sup>a,†</sup> | WS  | Ca, Fo                             |
| <i>Streptomyces</i> sp. FXJ1.417 <sup>a</sup>   | WS  | Af, Fo, Sa                         |
| <i>Streptomyces</i> sp. FXJ1.429 <sup>a</sup>   | WS  | Ca, Cp, Ec, Fo, Kp, Pa, Sa, Vc     |
| <i>Streptomyces</i> sp. FXJ1.430 <sup>a</sup>   | LJZ | Af, Ca, Cp, Sa                     |
| <i>Streptomyces</i> sp. FXJ1.433                | LJZ | Ca, Cp, Sa                         |
| <i>Streptomyces</i> sp. FXJ1.434 <sup>a,†</sup> | LJZ | Ca, Cp                             |
| <i>Streptomyces</i> sp. FXJ1.437 <sup>a</sup>   | LJZ | Ca, Cp                             |
| <i>Streptomyces</i> sp. FXJ1.439 <sup>a,†</sup> | LJZ | Cp, Kp                             |
| <i>Streptomyces</i> sp. FXJ1.442 <sup>a</sup>   | WS  | Af, Ca, Cp, Ec, Fo, Kp, Pa, Sa, Vc |
| <i>Streptomyces</i> sp. FXJ1.447 <sup>a</sup>   | LJZ | Ca, Cp, Fo, Sa                     |
| <i>Streptomyces</i> sp. FXJ1.450 <sup>a</sup>   | WS  | Ca, Cp, Fo, Ec, Kp, Pa, Sa, Vc     |
| <i>Streptomyces</i> sp. FXJ1.470 <sup>a,†</sup> | WS  | N                                  |
| <i>Streptomyces</i> sp. FXJ1.474 <sup>a,†</sup> | LJZ | Ca                                 |
| <i>Streptomyces</i> sp. FXJ1.475 <sup>a</sup>   | LJZ | Ca, Cp, Sa                         |
| <i>Streptomyces</i> sp. FXJ1.502 <sup>a</sup>   | LJZ | Af, Ca, Sa                         |
| <i>Streptomyces</i> sp. FXJ1.512 <sup>a</sup>   | LJZ | Af, Ca                             |
| <i>Streptomyces</i> sp. FXJ1.532 <sup>a,†</sup> | LJZ | Af, Ca, Cp, Fo                     |

|                                    |                                                                        |     |            |
|------------------------------------|------------------------------------------------------------------------|-----|------------|
|                                    | <i>Streptomyces</i> sp. FXJ1.535 <sup>a,†</sup>                        | LJZ | Sa         |
|                                    | <i>Streptomyces</i> sp. FXJ1.701 <sup>†</sup>                          | YL  | Af, Cp, Fo |
|                                    | <i>Streptomyces</i> sp. FXJ1.907 <sup>a,†</sup>                        | LJZ | Cp, Sa     |
|                                    | <i>Streptomyces</i> sp. FXJ1.1116 <sup>†</sup>                         | LJZ | Af         |
|                                    | <i>Streptomyces</i> sp. GTVL2G15 <sup>†</sup>                          | LJZ | Sa, Vc     |
|                                    | <i>Streptomyces</i> sp. FXJ23y <sup>a,†</sup>                          | LJZ | Af, Ca     |
| <b><i>Streptosporangiaceae</i></b> | <i>Nonomuraea jiangxiensis</i> FXJ1.102 <sup>T</sup><br><sup>a,†</sup> | AU  | N          |
|                                    | <i>Nonomuraea</i> sp. FXJ1.368 <sup>a,†</sup>                          | AU  | N          |
|                                    | <i>Microbispora</i> sp. FXJ1.457 <sup>a,†</sup>                        | WS  | Sa         |
|                                    | <i>Microbispora</i> sp. FXJ1.769 <sup>a,†</sup>                        | AU  | N          |
|                                    | <i>Microbispora</i> sp. FXJ1.1062 <sup>†</sup>                         | LJZ | N          |
|                                    | <i>Microtetraspora</i> sp. FXJ1.1037                                   | YL  | N          |
|                                    | <i>Sphaerisporangium</i> sp. FXJ1.452 <sup>a</sup>                     | LJZ | N          |
|                                    | <i>Streptosporangium</i> sp. FXJ1.481 <sup>a</sup>                     | WS  | N          |
|                                    | <i>Streptosporangium</i> sp. FXJ1.1111 <sup>a</sup>                    | LJZ | Af, Ca     |
|                                    | <i>Streptosporangium</i> sp. FXJ1.1117 <sup>a,†</sup>                  | LJZ | Af, Cp     |
| <b><i>Thermomonosporaceae</i></b>  | <i>Actinoallomurus</i> sp. FXJ1.503 <sup>a</sup>                       | LJZ | N          |
|                                    | <i>Actinocorallia</i> sp. FXJ1.544                                     | LJZ | N          |
|                                    | <i>Actinomadura</i> sp. FXJ1.340 <sup>a</sup>                          | WS  | Ca, Sa, Vc |
|                                    | <i>Actinomadura</i> sp. FXJ1.344 <sup>a</sup>                          | WS  | N          |
|                                    | <i>Actinomadura</i> sp. FXJ1.848 <sup>a</sup>                          | LJZ | N          |
|                                    | <i>Actinomadura</i> sp. FXJ1.1129 <sup>a,†</sup>                       | LJZ | N          |

<sup>a</sup> Strains assigned to the acidophilic group.

<sup>b</sup> Strains marked with (†) share < 99% 16S rRNA gene sequence similarity with the nearest type strain.

<sup>c</sup> Strains are antagonistic to the following indicators: Af, *Aspergillus fumigatus*; Fo, *Fusarium oxysporum*; Ca, *Candida albicans*; Cp, *Candida pseudorugosa*; Ec, *Escherichia Coli*; Kp, *Klebsiella pneumonia*; Pa, *Pseudomonas aeruginosa*; Sa, *Staphylococcus aureus*; Vc, *Vibrio cholera*. N, no antimicrobial activity shown.

**TABLE S7** Known secondary metabolites from the selected isolates

| No.                 | Strain                                           | Producing medium | Compound(s) <sup>c</sup>                         | Structural class         | Chemical data          |                                                                                                    |
|---------------------|--------------------------------------------------|------------------|--------------------------------------------------|--------------------------|------------------------|----------------------------------------------------------------------------------------------------|
|                     |                                                  |                  |                                                  |                          | UV (MeOH)              | MS ( <i>m/z</i> ) <sup>d</sup>                                                                     |
| <b>Streptomyces</b> |                                                  |                  |                                                  |                          |                        |                                                                                                    |
| 1                   | <i>Streptomyces</i> sp. FXJ1.050 <sup>a</sup>    | GYM              | Nigericin <sup>†</sup>                           | Polyether                | None                   | [M-H] <sup>-</sup> =723.6                                                                          |
|                     |                                                  |                  | Niphimycin                                       | Macrolide                | 231                    | [M+H] <sup>+</sup> =1142.7343                                                                      |
| 2                   | <i>Streptomyces</i> sp. FXJ1.055 <sup>a</sup>    | GYM              | 3 albonoursin type compounds                     | Diketopiperazine         | 317                    | Not measured                                                                                       |
| 3                   | <i>Streptomyces</i> sp. FXJ1.066                 | GYM              | Lobophorins A&B <sup>†</sup>                     | Macrolide                | 240, 266, 282(sh)      | [M+H] <sup>+</sup> =1157.5, 1185.7                                                                 |
|                     |                                                  | SGG              | Spoxazomicins A&B                                | Siderophore              | 243, 303               | [M+H] <sup>+</sup> =336.1384, 336.1382                                                             |
| 4                   | <i>Streptomyces</i> sp. FXJ1.068                 | GYM              | Spoxazomicin C                                   |                          | 241, 248, 260(sh), 300 | [M+H] <sup>+</sup> =194.0821                                                                       |
|                     |                                                  |                  | 5 milbemycins                                    | Macrolide                | 241/237/243/237/243    | [2M+Na] <sup>+</sup> =1111.4;<br>[M+H <sub>2</sub> O] <sup>+</sup> =644.3, 646.2,<br>658.2, 660.2  |
|                     |                                                  |                  | 4 nanchangmycins <sup>*</sup>                    | Polyether                | 234                    | [M+Na] <sup>+</sup> =889.9                                                                         |
| 5                   | <i>Streptomyces</i> sp. FXJ1.069 <sup>a, b</sup> | SGG              | Desferrioxamines E&G, ferrioxamine E             | Siderophore              | 236/234/238            | [M+Na] <sup>+</sup> =889.8, 889.8, 889.8                                                           |
| 6                   | <i>Streptomyces</i> sp. FXJ1.076 <sup>a</sup>    | GYM/MOSY         | 6 elaiophylin-type compounds                     | Macrolide                | 249                    | [M+H] <sup>+</sup> =601.3565, 654.2683, 619.3657                                                   |
|                     |                                                  | GYM              | Nigericin <sup>†</sup>                           | Polyether                | None                   | [M+Na] <sup>+</sup> =1019.5, 1033.8,<br>1047.6, 1047.8, 1061.5, 729.4<br>[M-H] <sup>-</sup> =723.6 |
| 7                   | <i>Streptomyces</i> sp. FXJ1.092 <sup>a</sup>    | GYM              | 3 Albonoursin type diketopiperazines             | Diketopiperazine         | 231, 315               | Not measured                                                                                       |
| 8                   | <i>Streptomyces</i> sp. FXJ1.093 <sup>b</sup>    | SGG              | 6 Albonoursin type diketopiperazines             | Diketopiperazine         | 233, 317               | [M+H] <sup>+</sup> =271.3, others not measured                                                     |
| 9                   | <i>Streptomyces</i> sp. FXJ1.172 <sup>a</sup>    | MOSY             | Thienodolin <sup>†</sup>                         | Indole derivative        | 236, 289, 329          | [M-H] <sup>-</sup> =248.9889                                                                       |
|                     |                                                  | GYM              | Lasalocid A-E <sup>*</sup>                       | Polyether                | 243, 302<br>243, 302   | [M-H] <sup>-</sup> =589.4<br>[M-H] <sup>-</sup> =603.4, 603.4, 603.4,<br>603.4                     |
|                     |                                                  | GYM              | Desferrioxamine E                                | Siderophore              | End abs.               | [M+H] <sup>+</sup> =601.4                                                                          |
| 10                  | <i>Streptomyces</i> sp. FXJ1.235 <sup>b</sup>    | MOSY/SGG         | Antibiotic PI 220 or Furaquinocins               | Quinone derivative       | 221, 268, 294, 414     | [M-H] <sup>-</sup> =385.1650                                                                       |
| 11                  | <i>Streptomyces</i> sp. FXJ1.249                 | MOSY             | β-rubromycin and 3'-OH-β-rubromycin <sup>#</sup> | Related to anthracycline | 228, 312, 348, 487/512 | [M+H] <sup>+</sup> =553.0988, 537.1050                                                             |
| 12                  | <i>Streptomyces</i> sp. FXJ1.253 <sup>a</sup>    | GYM/MOSY         | 6 elaiophylins                                   | Macrolide                | 249                    | Same as those of FXJ1.076                                                                          |
|                     |                                                  | GYM              | Nigericin                                        | Polyether                | None                   | [M-H] <sup>-</sup> =723.6                                                                          |

|                                        |                                                   |              |                                                          |                                           |                                                          |                                                                                                                                                 |
|----------------------------------------|---------------------------------------------------|--------------|----------------------------------------------------------|-------------------------------------------|----------------------------------------------------------|-------------------------------------------------------------------------------------------------------------------------------------------------|
| 13                                     | <i>Streptomyces</i> sp. FXJ1.264                  | GYM/MOSY     | Antibiotic BE 24566B <sup>†,‡</sup>                      | Anthracycline                             | 273, 364                                                 | [2M-H] <sup>-</sup> =723.6                                                                                                                      |
|                                        |                                                   | GYM          | Desferrioxamine E                                        | Siderophore                               | End abs.                                                 | [M+H] <sup>+</sup> =601.4                                                                                                                       |
|                                        |                                                   | GYM          | Etheromycin <sup>†</sup>                                 | Polyether                                 | None                                                     | [M-H] <sup>-</sup> =913.3                                                                                                                       |
| 14                                     | <i>Streptomyces</i> sp. FXJ1.297 <sup>a, b</sup>  | GYM          | 6, 8-dihydroxy-3-methyl-1H-isochromen-1-one <sup>†</sup> | Isocoumarin                               | 236, 243, 277, 326                                       | [2M-H] <sup>-</sup> =382.8                                                                                                                      |
| 15                                     | <i>Streptomyces</i> sp. FXJ1.408 <sup>a, b</sup>  | GYM/MOSY/SGG | Brunefungin or flavopentin                               | Polyene macrolide                         | 264, 363                                                 | [M+H] <sup>+</sup> =721.2                                                                                                                       |
| 16                                     | <i>Streptomyces</i> sp. FXJ1.409                  | MOSY         | 5-(3-Indolyl)oxazole Antibiotic SF 2583A                 | Indole-oxazole Chlorinated indole-oxazole | 221, 265, 300(sh)<br>220, 271, 287                       | [M+H] <sup>+</sup> =185.0717<br>[M+H] <sup>+</sup> =219.0334                                                                                    |
| 17                                     | <i>Streptomyces</i> sp. FXJ1.414 <sup>a, b</sup>  | GYM/MOSY/SGG | Brunefungin or flavopentin                               | Polyene macrolide                         | 264, 363                                                 | [M+H] <sup>+</sup> =721.2                                                                                                                       |
| 18                                     | <i>Streptomyces</i> sp. FXJ1.417 <sup>a</sup>     | MOSY         | Cyclothiazomycin                                         | Thiopeptide                               | 221, 270(sh)                                             | [M-H] <sup>-</sup> =1471.4                                                                                                                      |
| 19                                     | <i>Streptomyces</i> sp. FXJ1.437 <sup>a</sup>     | MOSY         | 1 micropeptin type compound                              | Peptide                                   | 220, 280                                                 | [M+H] <sup>+</sup> =1003.6                                                                                                                      |
| 20                                     | <i>Streptomyces</i> sp. FXJ1.450 <sup>a</sup>     | MOSY         | Borrelidin                                               | PKS type macrolide                        | 254                                                      | [M-H] <sup>-</sup> =488.5                                                                                                                       |
| 21                                     | <i>Streptomyces</i> sp. FXJ1.502 <sup>a</sup>     | MOSY         | Cyclothiazomycin                                         | Thiopeptide                               | 221, 270(sh)                                             | [M-H] <sup>-</sup> =1471.6                                                                                                                      |
| 22                                     | <i>Streptomyces</i> sp. FXJ1.535 <sup>a, b</sup>  | SGG          | Ochromycinone                                            | Angucycline                               | 265, 400                                                 | [M+H] <sup>+</sup> =307.0977                                                                                                                    |
| 23                                     | <i>Streptomyces</i> sp. FXJ1.701 <sup>b</sup>     | SGG          | Anisomycin C                                             | Benzylpyrrolidine                         | 230(sh), 276                                             | [M+H] <sup>+</sup> =292.1055                                                                                                                    |
| 24                                     | <i>Streptomyces</i> sp. FXJ1.907 <sup>a, b</sup>  | GYM          | 4-5 milbemycins $\beta$ series compounds                 | Macrolide                                 | 237-241                                                  | Similar to those of FXJ1.068                                                                                                                    |
|                                        |                                                   |              | 2 nanchangmycins                                         | Polyether                                 | 234/236                                                  | Similar to those of FXJ1.068                                                                                                                    |
| 25                                     | <i>Streptomyces</i> sp. GTVL2G15 <sup>b</sup>     | SGG          | Oxachelin                                                | Siderophore                               | 242, 250, 260(sh), 303                                   | [M+H] <sup>+</sup> =636.2                                                                                                                       |
| <b>Non-streptomycete actinomycetes</b> |                                                   |              |                                                          |                                           |                                                          |                                                                                                                                                 |
| 1                                      | <i>Nocardia</i> sp. FXJ1.010 <sup>a, b</sup>      | GYM/MOSY     | Guanidylfungin A&B                                       | Macrolide                                 | End abs.                                                 | [M-H] <sup>-</sup> =1114.5, 1128.5                                                                                                              |
| 2                                      | <i>Amycolatopsis</i> sp. FXJ1.274 <sup>a, b</sup> | SGG          | Apoptolidin A, isoapoptolidin and 8 related derivatives  | Macrolide                                 | 230, 323<br>233, 313<br>232, 322<br>234, 305<br>234, 304 | [M+Na] <sup>+</sup> =1251.5<br>[M+Na] <sup>+</sup> =1251.5<br>[M+Na] <sup>+</sup> =1151.9<br>[M+Na] <sup>+</sup> =1151.7<br>Others not measured |
| 3                                      | <i>Actinomadura</i> sp. FXJ1.344 <sup>a</sup>     | SGG          | Homoprejadomycin                                         | Angucycline                               | 265, 400                                                 | [M+H] <sup>+</sup> =339.3                                                                                                                       |

<sup>a</sup> Strains assigned to the acidophilic group.

<sup>b</sup> Strains represented putative new species.

<sup>c</sup> The compounds marked with (†), (\*) and (‡) were also subjected to NMR, tandem-MS and CD analyses, respectively. Niphimycin was produced at pH 7.2.

<sup>d</sup> Figures accurate to one decimal place were generated by regular MS, and figures accurate to four decimal places were generated by HR-MS.

#### REFERENCES CITED IN THE SUPPLEMENTAL TABLES

**Li X, Zhang L, Ding Y, Gao Y, Ruan J, Huang Y.** 2012a. *Lentzea jiangxiensis* sp. nov., isolated from acidic soil. *Int. J. Syst. Evol. Microbiol.* **62**:2342–2346.

**Li X, Zhang L, Ding Y, Gao Y, Ruan J, Huang Y.** 2012b. *Nonomurea jiangxiensis* sp. nov., isolated from acidic soil. *Int. J. Syst. Evol. Microbiol.* **62**:1409–1413.

**Ludwig W, Euzéby J, Schumann P, Busse HJ, Trujillo ME, Kämpfer P, Whitman WB.** 2012. Road map of the phylum *Actinobacteria*, p 1–28. *In* Goodfellow M, Kämpfer P, Busse HJ, Trujillo ME, Suzuki K, Ludwig W, Whitman WB (ed) *Bergey's manual of systematic bacteriology*, 2nd ed, vol 5. Springer, New York, NY.

FIG S1

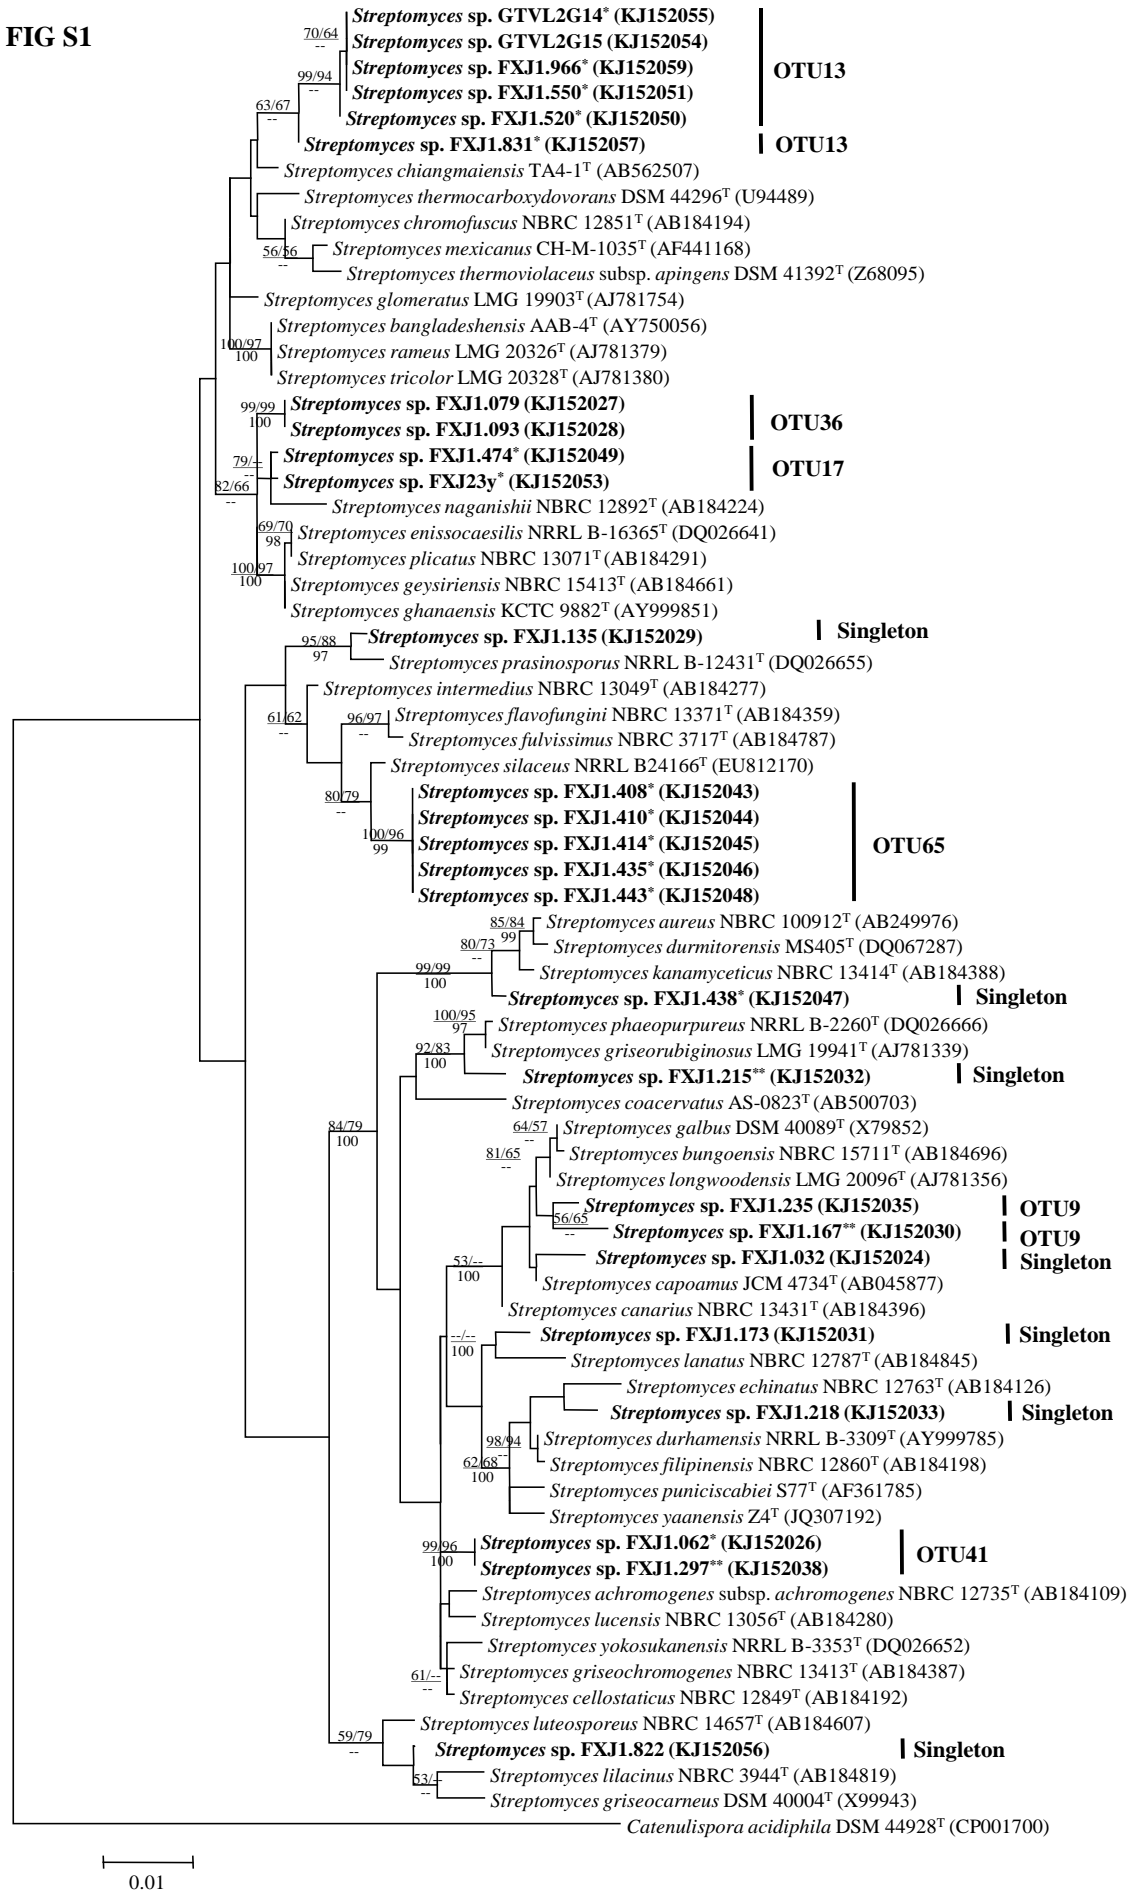



**APPENDIX S1** Chemical data and detailed structure elucidation of the novel secondary metabolites

*New compounds from Streptomyces sp. FXJ1.532*

After isolation and purification, two pure compounds [**FXJ15321** (30 mg) and **FXJ15322** (18 mg)] were obtained.

**FXJ15321** was obtained as pale yellow solid. Its molecular formula was established as C<sub>41</sub>H<sub>66</sub>O<sub>13</sub> according to the [M+Na]<sup>+</sup> at m/z 789.4402 (calcd. 789.4401) (see supplemental Fig. AS1) combined with the <sup>13</sup>C-NMR data and corresponding to nine degrees of unsaturation. The <sup>1</sup>H-NMR, <sup>13</sup>C-NMR, DEPT 135 and 2D-HSQC spectra (supplemental Figs. AS2-AS5) revealed the presences of three carbonyl groups, one ester or amide group, two olefinic groups, six methylene groups, 17 non-olefinic methine groups, nine methyl groups and one methoxy group (Table A1).

**TABLE A1** NMR data of **FXJ15321** and **FXJ15322** in  $CDCl_3$  [ $^1H$ - (600 MHz) and  $^{13}C$ -NMR (150 MHz),  $\delta$  in ppm,  $J$  in Hz]

| FXJ15321 |            |                               |            |                    |                  | FXJ15322   |                           |            |                           |               |
|----------|------------|-------------------------------|------------|--------------------|------------------|------------|---------------------------|------------|---------------------------|---------------|
| No.      | $\delta_C$ | $\delta_H$                    | COSY       | HMBC(H→C)          | ROESY            | $\delta_C$ | $\delta_H$                | COSY       | HMBC(H→C)                 | ROESY         |
| 1        | 172.8, C   | —                             |            | 2, 3, 24           |                  | 172.7, C   | —                         |            | 2, 3, 24                  |               |
| 2        | 39.6, CH2  | 2.43(dd; 10.8, 15.0)          | 3          | 3                  |                  | 39.8, CH2  | 2.42(dd; 11.4, 15.0) a    | 3          | 3, 4                      |               |
|          |            | a                             |            |                    |                  |            |                           |            |                           |               |
|          |            | 2.67(dd; 2.4, 15.0) b         |            |                    | 3                |            | 2.70(dd; 2.4, 15.0) b     |            |                           | 3             |
| 3        | 70.7, CH   | 4.27(m)                       | 2, 4       | 2, 4, 28           | 2b               | 70.9, CH   | 4.28(ddd, 2.4, 9.9, 9.9)  | 2, 4       | 2, 4, 28                  | 2b            |
| 4        | 44.8, CH   | 3.49(m)                       | 3, 28      | 2, 28              | 7, 28            | 44.8, CH   | 3.47(m)                   | 3, 28      | 2, 3, 28                  | 7, 28         |
| 5        | 204.9, C   | —                             |            | 3, 4, 7, 28, 29    |                  | 205, C     | —                         |            | 3, 4, 7, 28, 29           |               |
| 6        | 138.8, C   | —                             |            | 8, 30              |                  | 136.6, C   | —                         |            | 8, 29                     |               |
| 7        | 140.9, CH  | 6.47(d; 9.6)                  | 29         | 8, 29, 30          | 4                | 142.6, CH  | 6.66(d; 9.6)              | 29         | 8, 29, 30                 | 4             |
| 8        | 48.2, CH   | 3.85(m)                       | 7, 30      | 7, 30              | 29, 30           | 44.5, CH   | 4.01(dq, 6.6, 9.6)        | 7, 30      | 7, 30                     | 7, 29, 30     |
| 9        | 208.8, C   | —                             |            | 7, 8, 10, 30       |                  | 210.9, C   | —                         |            | 7, 8, 10, 11, 30          |               |
| 10       | 40.8, CH2  | 2.35(dd; 2.4, 16.2) a         | 11         |                    | 11, 31           | 47.2, CH2  | 2.33(dd; 9.6, 13.8) a     | 11         | 11, 12                    | 11            |
|          |            | 2.92(dd; 10.8, 16.2)          |            |                    | 31               |            | 3.03(dd; 3.6, 13.8) b     |            |                           | 11, 31        |
|          |            | b                             |            |                    |                  |            |                           |            |                           |               |
| 11       | 73.8, CH   | 4.34(ddd, 2.4, 3.6-4.2, 10.8) | 10, 12     | 10, 12, 13, 15, 31 | 10a, 12, 15b, 31 | 78.2, CH   | 3.52(ddd, 3.6, 9.6, 9.6)  | 10, 12     | 10, 12, 13, 15, 31        | 10,           |
| 12       | 38.4, CH   | 1.92(m)                       | 11, 13, 31 | 10, 31             | 11, 31           | 43.9, CH   | 1.53(ddq; 9.6, 9.6, 6.6,) | 11, 13, 31 | 10, 31                    | 10, 31        |
| 13       | 80.1, CH   | 3.43(m)                       | 12, 14     | 12, 14, 15, 31     | 31, a            | 83.9, CH   | 3.07(dd; 10.2, 10.2)      | 12, 14     | 11, 12, 14, 15, 16, 31, a | 11, 16, 31, a |
| 14       | 38.1, CH   | 1.58(m)                       | 13, 15, 16 | 13, 15, 16         | 15b              | 39.8, CH   | 1.39(m)                   | 13, 15, 16 | 13, 15, 16, 17            | 15b, 16b      |
| 15       | 66.1, CH2  | 3.26(m) a                     | 14         | 13, 16             | 16b              | 70.1, CH   | 2.82(dd, 12.0, 12.0) a    | 14         | 13, 16                    | 11            |

|    |           |                              |            |                    |               |                       |                           |                                                 |
|----|-----------|------------------------------|------------|--------------------|---------------|-----------------------|---------------------------|-------------------------------------------------|
|    |           | 3.71(dd; 3.6-4.2;<br>12.0) b |            | 11, 14             |               | 3.75(dd; 4.8; 12.0) b |                           | 14                                              |
| 16 | 34.1, CH2 | 1.26(m), a<br>2.15(m), b     | 14, 17     | 13, 15, 32         |               | 32.3, CH2             | 0.88(m) a<br>2.54(m) b    | 14, 17<br>13, 15, 32<br>13, 14                  |
| 17 | 38, CH    | 3.16(m)                      | 16, 32     | 16, 19             | 15a<br>19, 32 | 37.79, CH             | 3.08(m)                   | 16, 32<br>16, 19, 20, 32<br>15b, 16a, 20,<br>32 |
| 18 | 205.9, C  | —                            |            | 16, 17, 19, 20, 32 |               | 206, C                | —                         | 16, 17, 19, 20, 32                              |
| 19 | 131.6, CH | 6.16(d; 16.2)                | 20         | 21                 | 17, 20        | 131.4, CH             | 6.12(d; 16.2)             | 20<br>20, 21<br>20, 21                          |
| 20 | 146.3, CH | 6.97(ddd; 16.2, 6.6,<br>6.6) | 19, 21     | 21, 22             | 17, 19,       | 146.8, CH             | 6.95(ddd; 16.2, 6.6, 6.6) | 19, 21<br>19, 21, 22<br>19, 17                  |
| 21 | 37.9, CH2 | 2.29(m) a<br>2.50(m) b       | 20, 22     | 19, 20             |               | 37.85, CH2            | 2.27(m) a<br>2.49(m) b    | 20, 22<br>19, 20, 22<br>22, 23<br>33            |
| 22 | 68.6, CH  | 3.89(m)                      | 21, 23     | 20, 21, 24, 33     | 23            | 68.4, CH              | 3.85(m)                   | 21, 23<br>20, 21, 24, 33<br>24, 23, 21a         |
| 23 | 39.5, CH  | 1.90(m)                      | 22, 24, 33 | 21, 24, 33         | 22            | 39.6, CH              | 1.92(m)                   | 22, 24, 33<br>21, 24, 33<br>21a, 22, 24, 33     |
| 24 | 78.6, CH  | 5.06(dd; 4.2, 8.4)           | 23, 25     | 22, 23, 26, 33, 34 | 22            | 78.5, CH              | 5.07(dd; 3.6, 9.0)        | 23, 25<br>22, 23, 26, 33, 34<br>22, 23, 25      |
| 25 | 40, CH    | 1.85(m)                      | 24, 26, 34 | 24, 27, 34         | 26            | 39.9, CH              | 1.86(m)                   | 24, 26, 34<br>24, 27, 34                        |
| 26 | 65.6, CH  | 4.03(dq; 2.4, 6.0)           | 25, 27     | 24, 27, 34         | 25, 27        | 65.6, CH              | 4.07(dq; 6.6; 2.4-3.0)    | 25, 27<br>24, 27, 34<br>25, 27                  |
| 27 | 20.7, CH3 | 1.23(d; 6.6)                 | 26         | 26                 | 26            | 20.7, CH3             | 1.22(d; 6.6)              | 26<br>26<br>26                                  |
| 28 | 13.6, CH3 | 1.03(d; 7.2)                 | 4          | 4                  | 4             | 14, CH3               | 1.01(d; 7.2)              | 4<br>3, 4<br>4                                  |
| 29 | 10.9, CH3 | 1.96(s)                      | 7          | 7                  | 8             | 10.6, CH3             | 1.87(s)                   | 7<br>7<br>8                                     |
| 30 | 14.2, CH3 | 1.22(d; 6.6)                 | 8          | 7, 8               | 8             | 16, CH3               | 1.21(d; 6.6)              | 8<br>7, 8<br>8                                  |
| 31 | 12.5, CH3 | 1.03(d; 7.2)                 | 12         | 11, 12, 13         | 10, 11, 13, a | 12.1, CH3             | 1.07(d; 6.6)              | 12<br>11, 12, 13<br>10b, 13, a                  |
| 32 | 16.6, CH3 | 1.05(d; 7.2)                 | 17         | 16, 17             | 17            | 18.6, CH3             | 1.01(d; 7.2)              | 17<br>16, 17<br>17                              |
| 33 | 8.9, CH3  | 0.93(d; 7.2)                 | 23         | 22, 23, 24         | 21b           | 8.8, CH3              | 0.92(d; 7.2)              | 23<br>22, 23, 24<br>21b, 23                     |

|    |           |                        |      |            |              |           |                           |      |            |                  |
|----|-----------|------------------------|------|------------|--------------|-----------|---------------------------|------|------------|------------------|
| 34 | 9.8, CH3  | 0.97(d; 7.2)           | 25   | 25, 26     |              | 9.9, CH3  | 0.98(d; 7.2)              | 25   | 24, 25, 26 | 25               |
| a  | 102.9, CH | 4.26(d; 7.8)           | b    | 13, b, e   | 13, 31, b, e | 102.9, CH | 4.33(d; 7.2)              | b    | 13, b, e   | 13, 31, b, cb, e |
| b  | 74.3, CH  | 3.17(ddd; 0, 7.2, 7.2) | a, c | c, d       | a, ca        | 74.7, CH  | 3.20(ddd; 0, 7.2, 7.2)    | a, c | a, c, d    | a                |
| c  | 37.2, CH2 | 1.17(m) ca             | b, d |            | b            | 37.2, CH2 | 1.18(m) ca                | b, d | b, d       |                  |
|    |           | 2.12(m) cb             |      |            | d, e         |           | 2.13(ddd, 1.8, 5.4, 12.6) |      |            | d, e             |
|    |           |                        |      |            |              |           | cb                        |      |            |                  |
| d  | 80.2, CH  | 3.24(m)                | c, e | b, c, f, g | cb           | 80.3, CH  | 3.27(m)                   | c, e | b, c, e, g | a, cb            |
| e  | 67.4, CH  | 3.56(dq, 6.6, 1.8)     | d, f | c, f       | a, cb        | 67.3, CH  | 3.55(dq, 6.0, 1.8)        | d, f | c, f       | a, cb            |
| f  | 20, CH3   | 1.21(d; 6.6)           |      | e          |              | 19.9, CH3 | 1.23(d; 6.6)              |      | e          | e                |
| g  | 56, CH3   | 3.43(s)                |      | d          |              | 55.9, CH3 | 3.44(s)                   |      | d          |                  |

---

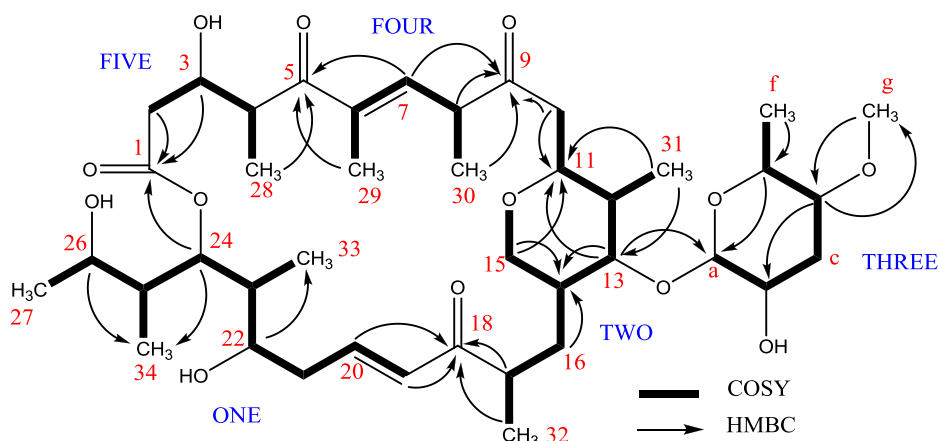

**FIG A1** Key  $^1\text{H}$ - $^1\text{H}$  COSY and HMBC correlations of **FXJ15321**

Detailed analysis of 2D-NMR spectra (supplemental Figs. AS5-AS7) revealed that **FXJ15321** was comprised of five partial structures (Fig. A1). Partial structure **one** was featured by the connections from H-19 to H-27, established by the COSY signals among these hydrogen atoms, and could be further sustained by the key HMBC correlations from H-22 to C-33, and from H-24, H-26 to C-34. Partial structure **two** was featured by the connections from H-10 to H-17, established by the COSY signals, and could be further sustained by the key HMBC correlations from H-31, H-15, H-13 and H-10 to C-11, from H-31 to C-13, and from H-16, H-15 and H-13 to C-14; and according to these correlations, an hexatomic ring system consisting C-11, C-12, C-13, C-14, C-15 and an oxygen atom could be established. Partial structure **three** was featured by the COSY connections with H-a/H-b/H-c/H-d/H-e/H-f, and was further sustained by the key HMBC correlations from H-f to C-e, from H-e to C-a, from H-d to C-b, C-g and from H-g to C-d; and according to these signals, a sugar ring composed of C-a, C-b, C-c, C-d, C-e, C-f and C-g was established. Partial structures **four** and **five** were elucidated by the connectivities among H-30/H-8/H-9/H-7/H-6/H-29 and H-2/H-3/H-4/H-28, and confirmed by their key HMBC correlations, respectively. The connectivities among these partial structures were mainly established by the HMBC correlations. For example, the connection between partial structures **one** and **five** could be recognized by the HMBC signals of H-24, H-2 and H-3 to C-1.

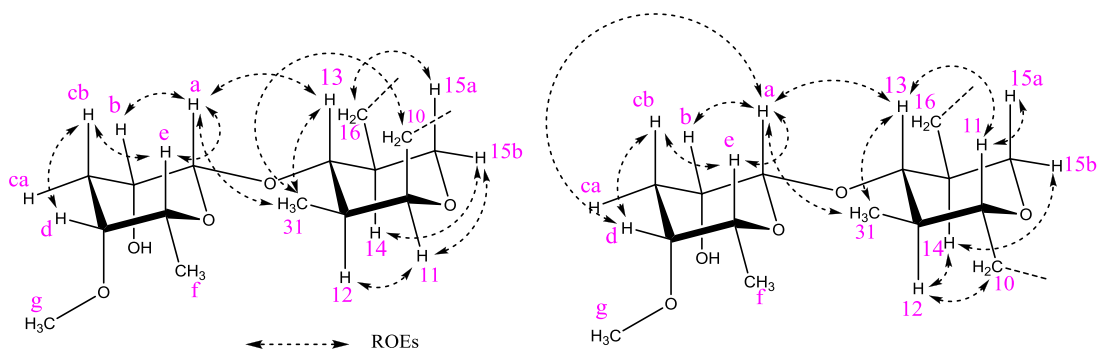

**FIG A2** Key NOE correlations of **FXJ15321** (left) and **FXJ15322** (right)

The possible relative configurations within partial structures **two** and **three** could be suggested according the ROESY experiment (Fig. A2, supplemental Fig. AS8). The NOE correlations

between H-12 and H-11, H-11 and H-15b, H15b and H14, H-13 and H-31, H16 and H15a, and between H-31 and H-10 suggested that H-12, H-14, H-15 and H-11 were on one face of the ring, and H-31, H-13 and H-10 on the other face of the ring. However, a certain deduction could not be made owing to a lack of coupling constants and direct ROE correlations between H12 and H14, H13 and H10, H13 and H15a, and between H15a and H10. The NOE correlations between H-a and H-e, H-a and H-b, H-e and H-cb, and between H-cb and H-d revealed that H-a, H-b, H-cb, H-d and H-e were on the same side of sugar ring. The strong NOE signals between H-a and H-13 and between H-a and H-31 stabilized the relative positions of the two rings. The very low  $J_{bca}$  (=0) and the strong NOE correlations observed between Ha and Hb supported the equatorial bond of Hb, although the coupling constants of  $J_{ab}$  and  $J_{bcb}$  were not small enough (7.2 Hz). Therefore, the relative configuration could be suggested as 11*S*\*, 12*R*\*, 13*R*\*, 14*S*\*, a*R*\*, b*S*\*, d*R*\* and e*R*\*. The C-19/C-20 olefin was assigned *E*-geometry based on their large coupling constant (16.2 Hz); the C-6/C-7 olefin was proposed as *E*-geometry based on the NOE correlation between H-29 and H-8 observed in both the ROESY and NOE difference experiments (supplemental Figs. AS8 and AS9).

**FXJ15322** was obtained as pale yellow solid. It's molecular formula was established as  $C_{41}H_{66}O_{13}$  according to the  $[M+Na]^+$  at  $m/z$  789.4408 (calcd. 789.4401) (supplemental Fig. AS10) combined with the  $^{13}C$ -NMR data and corresponding to nine degrees of unsaturation, too. Careful analysis of its 1D/2D-NMR data (supplemental Figs. AS11-AS17) revealed that the planar structure and most of the NOE correlations were identical with those of FXJ15321, with difference lying in the C-11 position. According to the ROESY experiment (supplemental Fig. AS17), NOE correlations between H-10 and H-12, H-14 and H-12, H-14 and H-15b, H-11 and H-13, and between H-11 and H-15a revealed that the relative configuration of C-11 position was changed (Fig. A2), and an *R*\* configuration was therefore proposed.

New compounds from *Streptomyces* sp. FXJ1.076

After isolation and purification, three pure compounds [**FXJ10761** (8.2 mg, efomycin M), **FXJ10762** (7.4 mg, new compound) and **FXJ10763** (4.0 mg, new natural product)] were obtained. **FXJ10761** was obtained as white solid. Its molecular formula was established as  $C_{42}H_{64}O_{10}$  according to the  $[M+H]^+$  at  $m/z$  729.4 and  $^1H/^{13}C/DEPT$  135-NMR data (Table A2, supplemental Figs. AS18-AS21). After careful analyses of its  $^1H$ -,  $^{13}C$ -NMR,  $^3J$  coupling constant and 2D-NMR data, including COSY, HSQC, HMBC and ROESY spectra (supplemental Figs. AS22-AS25), coupled with the optical rotation value  $[\alpha]_D^{25} = +103^\circ$  ( $c=0.4$ , MeOH), this compound was identified to be efomycin M (Antonicek *et al.*, 1996; Roland & Johann, 2007) (Fig. A3).

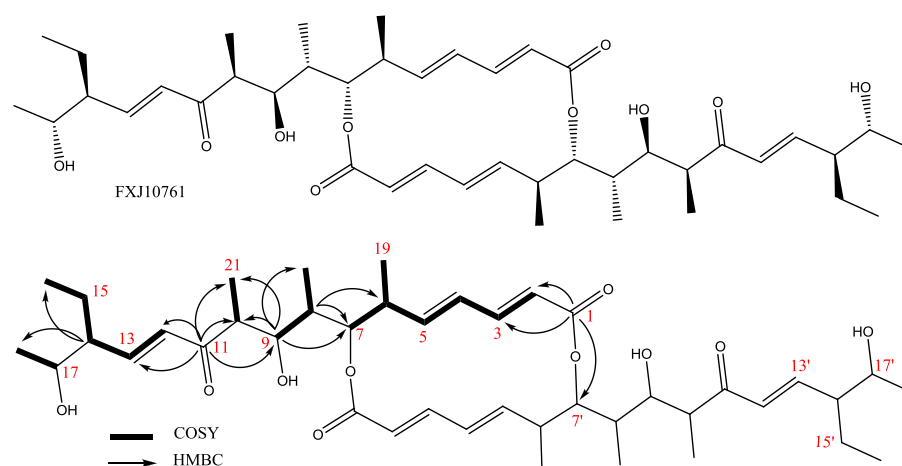

**FIG A3** Structure and Key  $^1H$ - $^1H$  COSY, HMBC correlations of **FXJ10761**

**TABLE A2** NMR data of **FXJ10761** in  $CDCl_3$  [ $^1H$ - (600 MHz) and  $^{13}C$ -NMR (150 MHz),  $\delta$  in ppm,  $J$  in Hz]. The COSY, HMBC and ROESY spectra were shown for half structure

| No.        | $\delta_C$             | $\delta_H$           | COSY     | HMBC(H $\rightarrow$ C) | ROESY            |
|------------|------------------------|----------------------|----------|-------------------------|------------------|
| 1 and 1'   | 168.38, C              | —                    |          | 2, 3, 7'                |                  |
| 2 and 2'   | 121.14, CH             | 5.61(d, 15.6)        | 3        | 3, 4                    |                  |
| 3 and 3'   | 145.25, CH             | 6.96(dd, 15.0, 11.4) | 2, 4     | 4, 5                    |                  |
| 4 and 4'   | 131.35, CH             | 6.05(dd, 15.0, 11.4) | 3, 5     | 2, 3, 6                 |                  |
| 5 and 5'   | 144.50, CH             | 5.64(m)              | 4, 6     | 3, 6, 7, 19             |                  |
| 6 and 6'   | 41.51, CH              | 2.49(m)              | 5, 7, 19 | 4, 5, 7, 19             |                  |
| 7 and 7'   | 76.63, CH              | 5.09(dd, 9.6, 0)     | 6        | 5, 9, 6, 8, 19, 20      | 8                |
| 8 and 8'   | 35.98, CH              | 1.94(m)              | 9, 20    | 6, 9, 10, 20            | 7                |
| 9 and 9'   | 71.54, CH              | 3.73(dd, 7.2, 0)     | 8        | 7, 8, 10, 20, 21        | 20               |
| 10 and 10' | 45.47, CH              | 2.90(m)              | 21       | 21                      | 20               |
| 11 and 11' | 203.17, C              | —                    |          | 9, 10, 12, 13, 21       |                  |
| 12 and 12' | 131.00, CH             | 6.23(d, 16.2)        | 13       | 13, 14                  |                  |
| 13 and 13' | 147.61, CH             | 6.72(dd; 9.6, 16.2)  | 12, 14   | 14, 15, 17              |                  |
| 14 and 14' | 52.38, CH              | 2.04(m)              | 13, 15   | 12, 13, 15, 16, 17, 18  |                  |
| 15 and 15' | 23.54, CH <sub>2</sub> | 1.43(m), 1.61(m)     | 14, 16   | 13, 14, 16, 17          |                  |
| 16 and 16' | 11.92, CH <sub>3</sub> | 0.86(d; 7.2)         | 15       | 14, 15                  | 15a (0.86ppm)    |
| 17 and 17' | 69.55, CH              | 3.82(m)              | 18       | 13, 14, 15, 18          |                  |
| 18 and 18' | 21.34, CH <sub>3</sub> | 1.17(d; 6.6)         | 17       | 14, 17                  |                  |
| 19 and 19' | 15.32, CH <sub>3</sub> | 1.03(d; 6.6)         | 6        | 5, 6, 7                 | 21               |
| 20 and 20' | 9.25, CH <sub>3</sub>  | 0.92(d; 6.6)         | 8        | 7, 8, 9                 | 6, 9, 10, 18, 21 |
| 21 and 21' | 9.21, CH <sub>3</sub>  | 1.17(d; 6.6)         | 10       | 9, 10                   | 19               |



**FXJ10762** was obtained as white solid. Its molecular formula was established as  $C_{41}H_{62}O_{10}$  according to the  $[M+HCOO]^-$  at  $m/z$  759.4320 (calcd. 759.4320) and  $^1H/^{13}C/DEPT$  135-NMR data (Table A3, supplemental Figs. AS26-AS29). The planar structure was deduced mainly according to comparison of  $^1H$  and  $^{13}C$ -NMR data with those of **FXJ10761**. The 2D-COSY/HSQC/HMBC spectra (supplemental Figs. AS30-AS32) demonstrated that the compound lacked the C-16' group, and thus the planar structure was established (Fig. A4). Because the correlation signals of 2D-NOESY spectrum (supplemental Fig. AS33) were not strong enough, the stereo-structure was proposed to be identical with that of **FXJ10761** mainly owing to the high similarity in  $^1H$  and  $^{13}C$  NMR data.

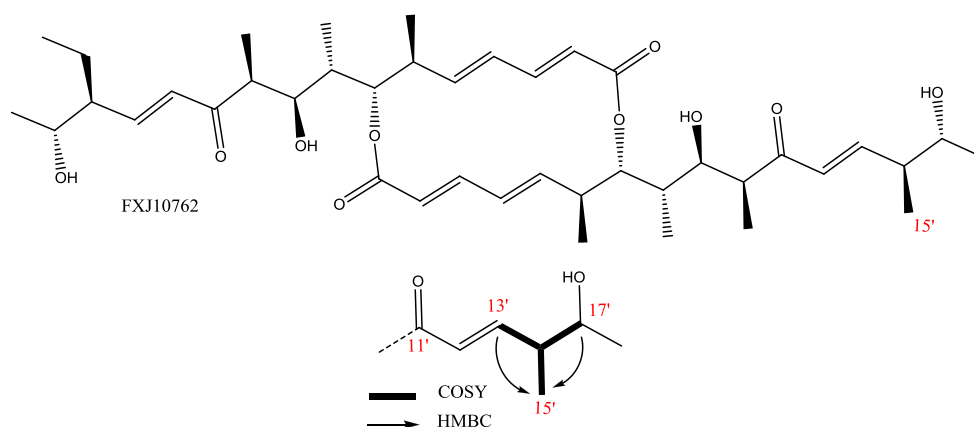

**FIG A4** Structure and key  $^1H$ - $^1H$  COSY and HMBC correlations of **FXJ10762**

**TABLE A3** NMR data of **FXJ10762** in  $CDCl_3$  [ $^1H$ - (600 MHz) and  $^{13}C$ -NMR (150 MHz),  $\delta$  in ppm,  $J$  in Hz]

| No. | $\delta_C$             | $\delta_H$          | COSY       | HMBC(C→H)              | ROESY  | No. | $\delta_C$             | $\delta_H$ | COSY          | HMBC(C→H)               | ROESY    |
|-----|------------------------|---------------------|------------|------------------------|--------|-----|------------------------|------------|---------------|-------------------------|----------|
| 1   | 168.38, C              | —                   |            | 2, 3, 7'               |        | 1'  | 168.38, C              | —          |               | 2', 3', 7'              |          |
| 2   | 121.15, CH             | 5.61(m)             | 3          | 3, 4                   |        | 2'  | 121.11, CH             | 5.61(m)    | 3'            | 3', 4'                  |          |
| 3   | 145.24, CH             | 6.96(m)             | 2, 4       | 4, 5                   |        | 3'  | 145.31, CH             | 6.96(m)    | 2', 4'        | 4', 5'                  |          |
| 4   | 131.34, CH             | 6.05(m)             | 5, 3       | 2, 3, 6                | 6      | 4'  | 131.34, CH             | 6.05(m)    | 5', 4'        | 2', 3', 6'              | 6'       |
| 5   | 144.47, CH             | 5.62(m)             | 4, 6       | 3, 6, 7, 19            |        | 5'  | 144.56, CH             | 5.62(m)    | 4', 6'        | 3', 6', 7', 19'         |          |
| 6   | 41.53, CH              | 2.49(m)             | 5, 7, 19   | 4, 5, 7, 19            | 4      | 6'  | 41.53, CH              | 2.49(m)    | 5', 7', 19'   | 4', 5', 7', 19'         | 4'       |
| 7   | 76.63, CH              | 5.09(m)             | 6, 8       | 5, 6, 9, 19, 20        | 8      | 7'  | 77.20, CH              | 5.09(m)    | 6', 8'        | 5', 6', 9', 19', 20'    | 8'       |
| 8   | 35.97, CH              | 1.94(m)             | 7, 9, 20   | 6, 9, 10, 20           | 7      | 8'  | 35.89, CH              | 1.94(m)    | 7', 9', 20'   | 6', 9', 10', 20'        | 7'       |
| 9   | 71.54, CH              | 3.74(m)             | 8, 10      | 7, 8, 10, 20, 21       | 10, 12 | 9'  | 71.64, CH              | 3.74(m)    | 8', 10'       | 7', 8', 10', 20', 21'   | 10', 12' |
| 10  | 45.47, CH              | 2.89(m)             | 9, 21      | 8, 21                  | 9, 21  | 10' | 45.65, CH              | 2.89(m)    | 9', 21'       | 8', 21'                 | 9', 21'  |
| 11  | 203.17, C              | —                   |            | 9, 10, 12, 13, 21      |        | 11' | 203.49, C              | —          |               | 9', 10', 12', 13', 21'  |          |
| 12  | 131.00, CH             | 6.25(m)             | 13         | 13, 14                 | 9      | 12' | 129.03, CH             | 6.25(m)    | 13'           | 13', 14'                | 9'       |
| 13  | 147.60, CH             | 6.74(m)             | 12, 14     | 14, 15, 17             |        | 13' | 149.14, CH             | 6.87(m)    | 12', 14'      | 14', 15', 17'           |          |
| 14  | 52.38, CH              | 2.04(m)             | 13, 15, 17 | 12, 13, 15, 16, 17, 18 |        | 14' | 44.37, CH              | 2.34(m)    | 13', 15', 17' | 12', 13', 15', 17', 18' |          |
| 15  | 23.55, CH <sub>2</sub> | 1.43(m),<br>1.61(m) | 14, 16     | 13, 14, 16, 17         |        | 15' | 15.60, CH <sub>3</sub> | 1.07(m)    | 14'           | 13', 14', 16', 17'      |          |
| 16  | 11.92, CH <sub>3</sub> | 0.87(m)             | 15         | 14, 15                 |        | 16' | none                   | none       |               |                         |          |
| 17  | 69.56, CH              | 3.82(m)             | 14, 18     | 13, 14, 15, 18         |        | 17' | 70.85, CH              | 3.74(m)    | 14', 18'      | 13', 14', 15', 18'      |          |
| 18  | 21.35, CH <sub>3</sub> | 1.17(m)             | 17         | 14, 17                 |        | 18' | 20.82, CH <sub>3</sub> | 1.17(m)    | 17'           | 14', 17'                |          |
| 19  | 15.32, CH <sub>3</sub> | 1.04(m)             | 6          | 5, 6, 7                |        | 19' | 15.32, CH <sub>3</sub> | 1.04(m)    | 6'            | 5', 6', 7'              |          |
| 20  | 9.28, CH <sub>3</sub>  | 0.93(m)             | 8          | 7, 8, 9                |        | 20' | 9.28, CH <sub>3</sub>  | 0.93(m)    | 8'            | 7', 8', 9'              |          |
| 21  | 9.21, CH <sub>3</sub>  | 1.17(m)             | 10         | 9, 10                  |        | 21' | 9.40, CH <sub>3</sub>  | 1.17(m)    | 10'           | 9', 10'                 |          |

**FXJ10763** was obtained as white solid. Its molecular formula was established as  $C_{48}H_{76}O_{14}$  according to the  $[M+HCOO]^-$  at  $m/z$  921.5228 (calcd. 921.5212) and  $^1H/^{13}C/DEPT$  135-NMR data (Table A4, supplemental Figs. AS34-AS37). Careful comparison with the NMR data of **FXJ10761** revealed that half structure of the compound was in accordance with **FXJ10761**, with differences lying in another half structure. To deduce the differences, the 2D-COSY/HSQC/HMBC spectra (supplemental Figs. AS38-AS40) were made and key H-H and C-H correlation signals relevant to the different positions were analyzed (Fig. A5). From the COSY and HMBC spectra, we could establish two ring systems from C-11' to C-18' and from C-a to C-f, which was further verified by the comparison of  $^{13}C$ -NMR data with the ring system of compound elaiophylin. The planar structure was thus established (Fig. A5). The chemical shifts from C-1 to C-21 and corresponding H were in accordance with those of FXJ10761, meanwhile, the chemical shifts from C-1' to C-21', and from C-a to C-f and corresponding H were in accordance with those of elaiophylin (Cui *et al.*, 2001), thus, the stereo-structure of FXJ10763 was proposed (Fig. A5). The optical rotation value of  $[\alpha]_D^{25} = +10^\circ$  ( $c=0.21$ , MeOH) indicated that it might be identical with compound 38 ( $[\alpha]_D^{25} = +13^\circ$ ) synthesized by Hammann *et al.* (1990).

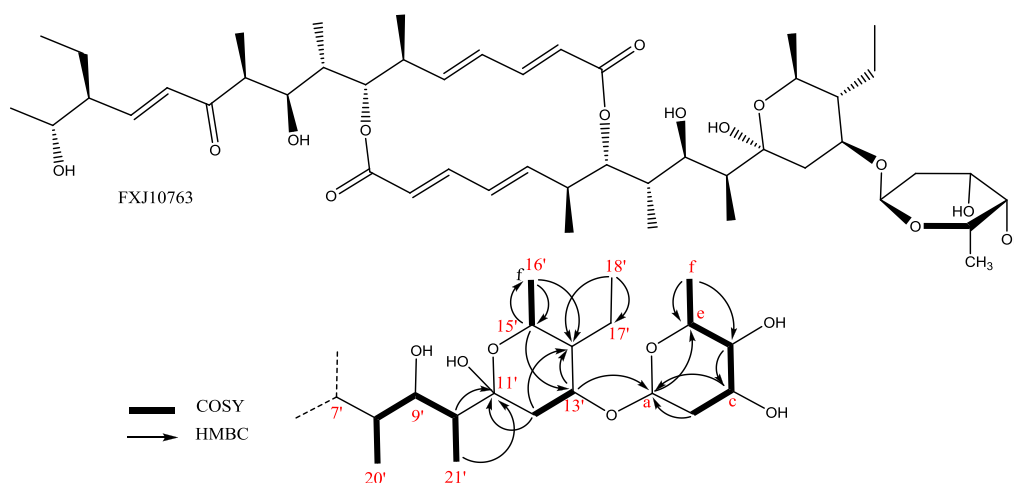

**FIG A5** Structure and key  $^1H$ - $^1H$  COSY and HMBC correlations of **FXJ10763**

**TABLE A4** NMR data of **FXJ10763** in  $CDCl_3$  [ $^1H$ - (600 MHz) and  $^{13}C$ -NMR (150 MHz),  $\delta$  in ppm,  $J$  in Hz]

| No. | $\delta_C$ | $\delta_H$           | COSY       | HMBC(H $\rightarrow$ C) | No. | $\delta_C$ | $\delta_H$                   | COSY        | HMBC(H $\rightarrow$ C) |
|-----|------------|----------------------|------------|-------------------------|-----|------------|------------------------------|-------------|-------------------------|
| 1   | 170.05, C  | —                    |            | 2, 3, 7'                | 1'  | 168.36, C  | —                            |             | 2', 3', 7'              |
| 2   | 121.14, CH | 5.62(d, 15.0)        | 3          | 3, 4                    | 2'  | 120.99, CH | 5.61(d, 15.0)                | 3'          | 3', 4'                  |
| 3   | 145.18, CH | 6.97(m)              | 2, 4       | 4, 5                    | 3'  | 145.02, CH | 6.97(m)                      | 2', 4'      | 4', 5'                  |
| 4   | 131.50, CH | 6.07(dd, 15.0, 15.0) | 5, 3       | 2, 3, 6                 | 4'  | 131.92, CH | 6.07(dd, 15.0, 15.0)         | 5', 3'      | 2', 3', 6'              |
| 5   | 144.64, CH | 5.67(dd, 15.0, 7.8)  | 4, 6       | 3, 6, 7, 19             | 5'  | 144.18, CH | 5.66(dd, 15.0, 7.8)          | 4', 6'      | 3', 6', 7', 19'         |
| 6   | 41.34, CH  | 2.52(m)              | 5, 7, 19   | 4, 5, 7, 19             | 6'  | 40.95, CH  | 2.52(m)                      | 5', 7', 19' | 4', 5', 7', 19'         |
| 7   | 76.75, CH  | 5.05(m)              | 6, 8       | 5, 6, 9, 19, 20         | 7'  | 77.81, CH  | 4.75(dd, 10.2, 10.2)         | 6', 8'      | 5', 6', 9', 19', 20'    |
| 8   | 36.10, CH  | 1.95(m)              | 7, 9, 20   | 7, 9, 20                | 8'  | 35.84, CH  | 1.95(m)                      | 7', 9', 20' | 7', 9', 20'             |
| 9   | 71.47, CH  | 3.74(dd, 8.4, 8.4)   | 8, 10      | 7, 8, 10, 20, 21        | 9'  | 70.66, CH  | 4.11(dd, 9.6, 9.6)           | 8', 10'     | 7', 8', 11', 20', 21'   |
| 10  | 45.54, CH  | 2.89(m)              | 9, 21      | 21                      | 10' | 41.61, CH  | 1.71(m)                      | 9', 21'     | 21'                     |
| 11  | 203.03, C  | —                    |            | 9, 10, 12, 13, 21       | 11' | 99.04, C   | —                            |             | 10', 12', 21'           |
| 12  | 130.96, CH | 6.24(d, 15.6)        | 13         | 14                      | 12' | 38.89, CH2 | 1.02(m), 2.37(dd, 10.8, 3.0) | 13'         | none                    |
| 13  | 147.53, CH | 6.72(dd, 15.0, 9.6)  | 12, 14     | 14, 15, 17              | 13' | 70.20, CH  | 3.98(m)                      | 12'         | 12', 15'                |
| 14  | 52.37, CH  | 2.03(m)              | 13, 15, 17 | 12, 13, 15, 16, 17, 18  | 14' | 48.42, CH  | 1.17(m)                      | none        | 12', 13', 16', 18'      |
| 15  | 23.55, CH2 | 1.42(m), 1.61(m)     | 14, 16     | 13, 14, 16, 17          | 15' | 66.54, CH  | 3.90(dt, 9.6, 5.4)           | 16'         | 16'                     |
| 16  | 11.91, CH3 | 0.86(m)              | 15         | 14, 15                  | 16' | 19.14, CH3 | 1.10(d, 5.4)                 | 15'         | 15'                     |
| 17  | 69.55, CH  | 3.81(td, 5.4, 5.4)   | 14, 18     | 13, 14, 15, 18          | 17' | 19.37, CH2 | 0.84(m), 1.00(m)             | none        | 18'                     |
| 18  | 21.34, CH3 | 1.17(m)              | 17         | 14, 17                  | 18' | 9.07, CH3  | 0.86(m)                      | none        | none                    |
| 19  | 15.27, CH3 | 1.04(d, 6.6)         | 6          | 5, 6, 7                 | 19' | 14.91, CH3 | 1.03(d, 6.0)                 | 6'          | 5', 6'                  |
| 20  | 9.19, CH3  | 0.92(d, 6.6)         | 8          | 7, 8, 9                 | 20' | 8.75, CH3  | 0.81(d, 6.0)                 | 8'          | 7', 8'                  |
| 21  | 9.07, CH3  | 1.17(m)              | 10         | 9, 10                   | 21' | 7.04, CH3  | 1.00(m)                      | 10'         | 9', 10'                 |
|     |            |                      |            |                         | a   | 93.24, CH  | 5.05(s)                      | b           | 13', b, c               |
|     |            |                      |            |                         | b   | 33.54, CH2 | 1.79(m)                      | a, c        | d                       |
|     |            |                      |            |                         | c   | 66.06, CH  | 3.98(m)                      | b, d        | b, d                    |
|     |            |                      |            |                         | d   | 71.47, CH  | 3.62(m)                      | c, e        | b, f, c or e            |
|     |            |                      |            |                         | e   | 65.90, CH  | 3.98(m)                      | d, f        | a, f                    |
|     |            |                      |            |                         | f   | 16.79, CH3 | 1.24(d, 6.6)                 | e           | e                       |

*New compound from Streptomyces sp. FXJ1.172*

After isolation and purification, one pure compound--**thienodolin** (>50 mg, from 12 L fermentation mixture) was obtained. A hydroxyl derivative was also discovered but very unstable, and could rapidly degrade to thienodolin after the crude extract was isolated either by silica-gel, LH-20 gel, RP-18 gel or by HPLC with natural pH water, 0.05% acetic acid or 0.05% ammonia water. Therefore, the structure of this new compound was deduced mainly according to the comparison of HR-MS/MS and <sup>1</sup>H-NMR spectra with thienodolin. The <sup>1</sup>H-NMR spectrum was obtain according to the procedure below: the crude extract was redissolved using methanol in which the new compound was relatively stable (it was very unstable in DMSO), and subjected to HPLC directly (according to our experiment, this compound could exist for about one day after HPLC preparation at natural pH) for 20 injections with 30 μl per injection; the collected liquid was concentrated to dryness in vacuum as soon as possible, follow by the redissolving with *methanol-d<sub>4</sub>*, and the <sup>1</sup>H-NMR spectrum was made immediately.

The molecular formula of the new compound was established as C<sub>11</sub>H<sub>7</sub>ClN<sub>2</sub>O<sub>2</sub>S according to the [M-H]<sup>-</sup> at m/z 264.9878 (calcd. 264.9839). Thiendolion was obtain as C<sub>11</sub>H<sub>7</sub>ClN<sub>2</sub>OS according to the [M-H]<sup>-</sup> at m/z 248.9889 (calcd. 248.9890).

By comparing the <sup>1</sup>H-NMR spectra of thienodolin and the new compound (Fig. A6), we found their signals between 7.0-8.2 ppm, which were attributed to the hydrogen signals of aromatic and thiophene rings, were nearly identical, indicating that the hydroxylation was occurred neither on the aromatic ring nor on the thiophene ring. Further MS2 fragment ions of the two compounds (Figs. A7 and A8) indicated that the hydroxylation was not on the NH<sub>2</sub>-C=O group. Therefore, the hydroxylation should be occurred on the nitrogen atom of the indole ring, and the new compound was identified as **N-hydroxythienodolin**.

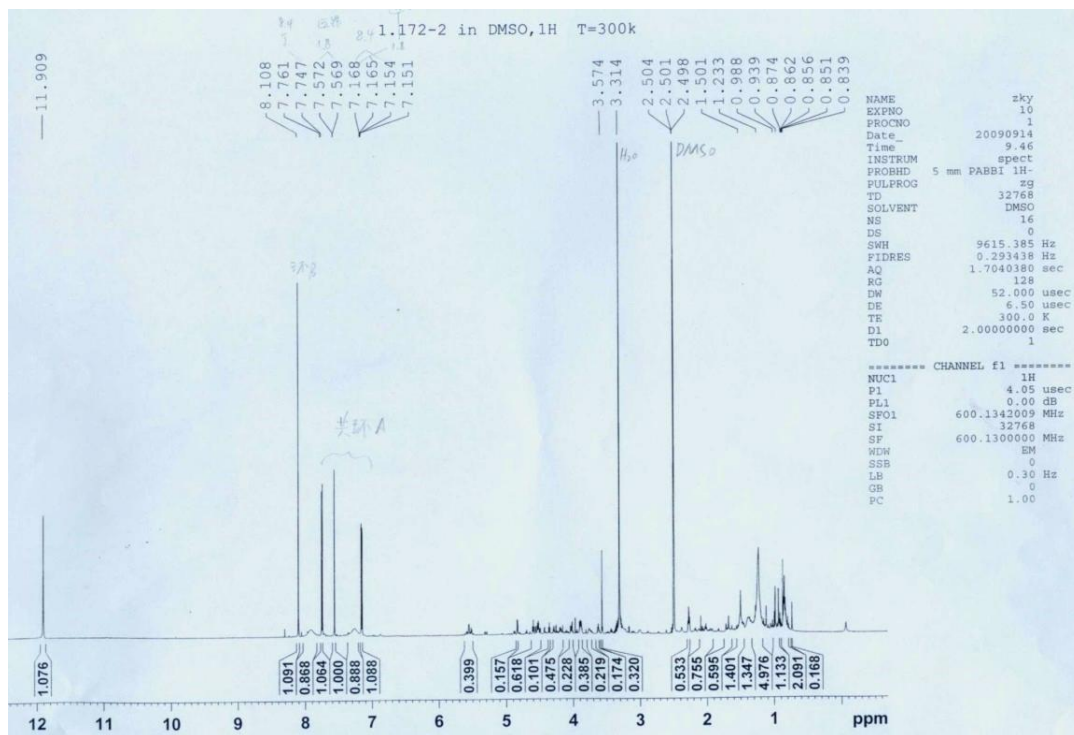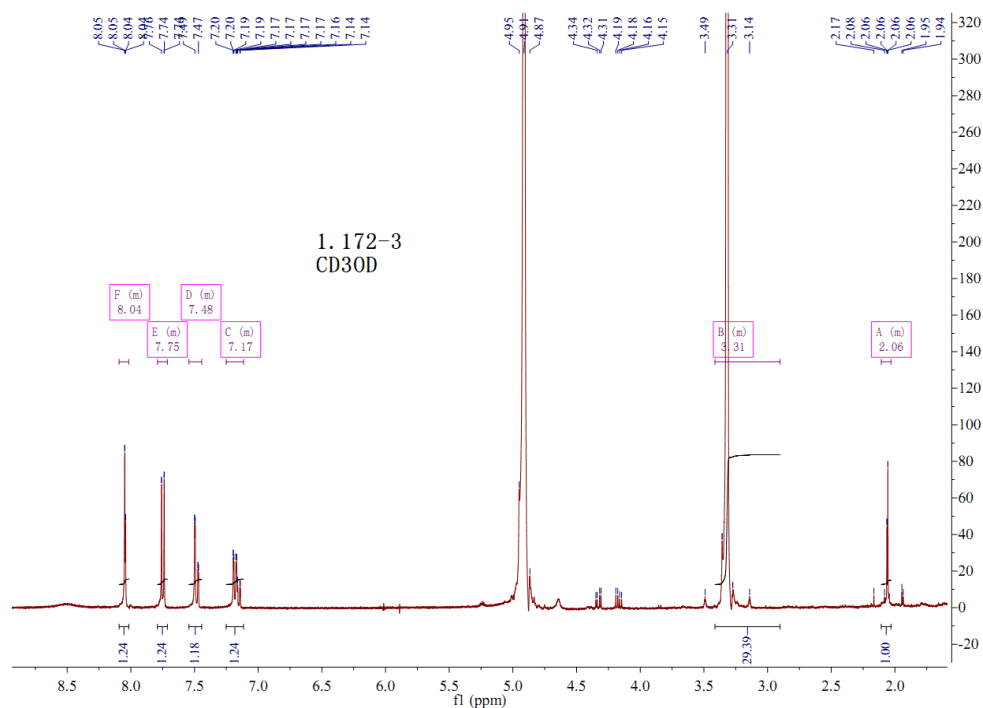

FIG A6 <sup>1</sup>H-NMR of thienodolin (upper) and N-hydroxythienodolin (lower)

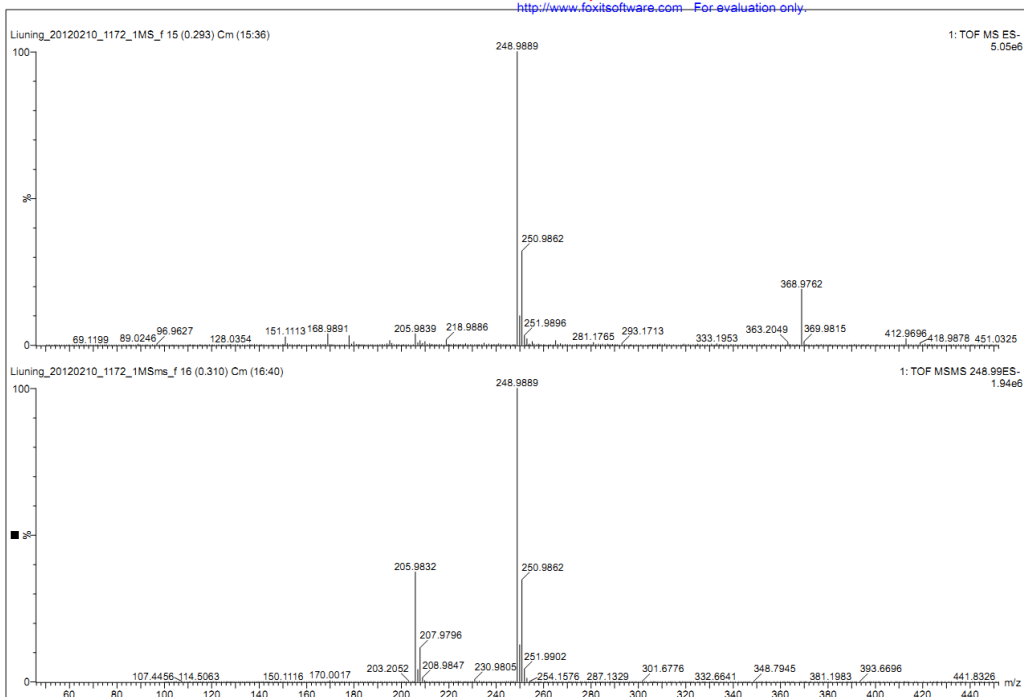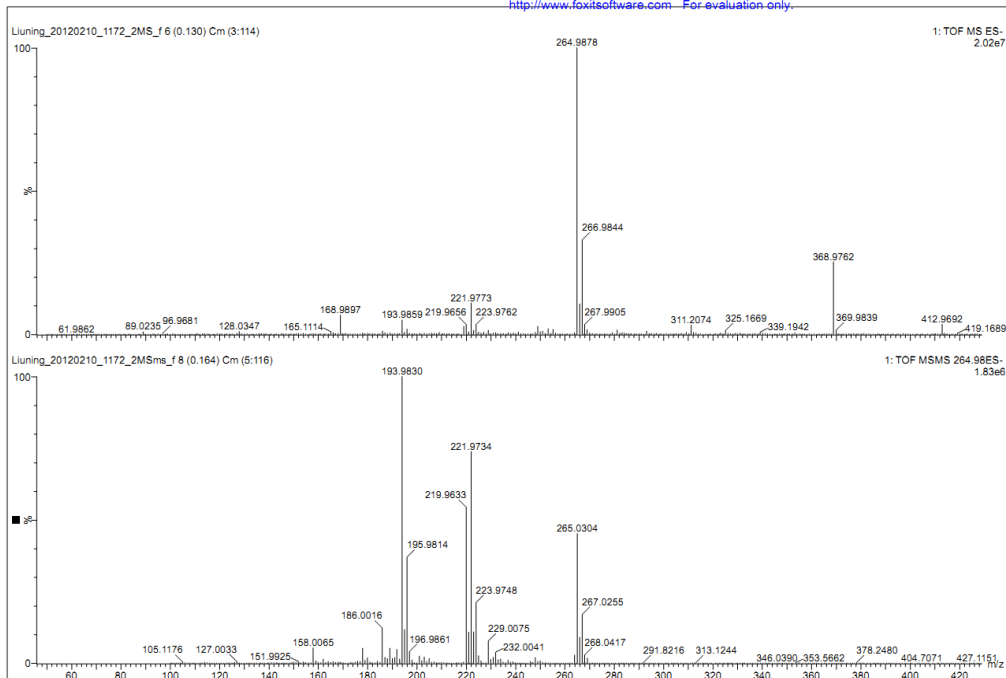

FIG A7 MS/MS fragments of thienodolin (upper) and N-hydroxytheinodolin (lower)

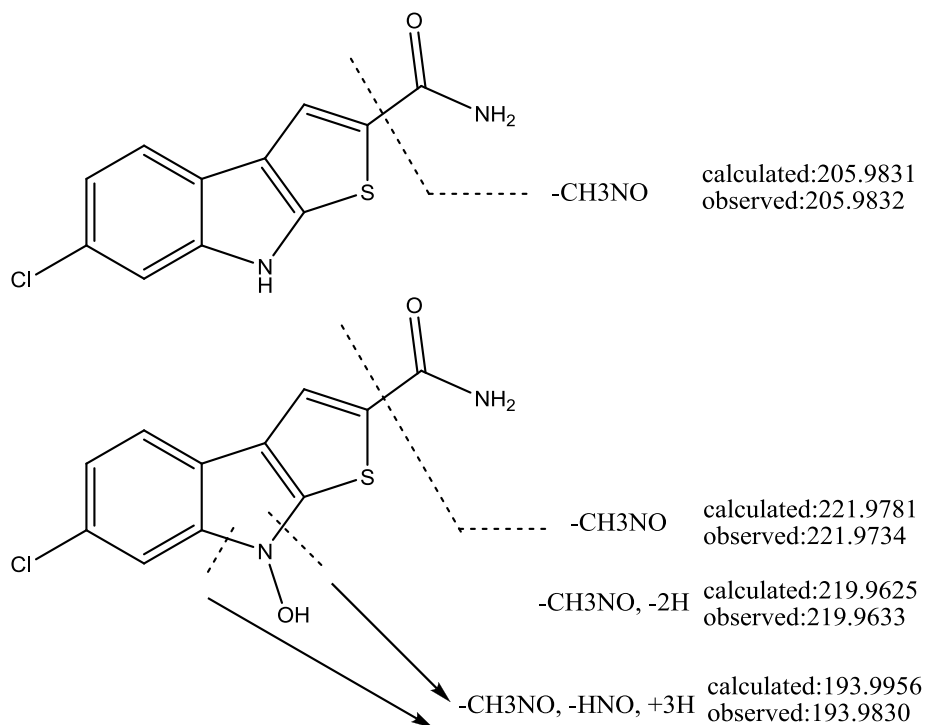

**FIG A8** MS/MS fracture patterns of thienodolin (upper) and N-hydroxythienodolin (lower)

#### REFERENCES CITED IN APPENDIX S1

- Antonicek HP, Bischoff E, Gondol D, Gutbrod O, Krahn T, Rodriguez ML, Schütz H.** 1996. Use of efomycins. US patent 6, 291, 515.
- Barth R, Mulzer J.** 2007. Total synthesis of efomycine M. *Angew. Chem. Int. Ed. Engl.* **46**:5791–5794.
- Cui C, Wang H, Han B, Song Y.** 2001. Elaiophylins, new cell cycle inhibitors and apoptosis inducers, produced by *Streptomyces pseudoverticillus* (III) structural and NMR studies. *Chin. J. Med. Chem.* **11**:25–31.
- Hammann P, Kretzschmar G, Seibert G.** 1990. Secondary metabolites by chemical screening. 7. I. Elaiophylin derivatives and their biological activities. *J. Antibiot. (Tokyo)*. **43**:1431–1440.



## Supplemental Figures

FIG. AS1 HR-ESI-MS spectrum of **FXJ15321**.

FIG. AS2  $^1\text{H}$ -NMR spectrum (600 MHz,  $\text{CD}_3\text{OD}$ ) of **FXJ15321**.

FIG. AS3  $^{13}\text{C}$ -NMR spectrum (150 MHz,  $\text{CD}_3\text{OD}$ ) of **FXJ15321**.

FIG. AS4 DEPT 135 spectrum (150 MHz,  $\text{CD}_3\text{OD}$ ) of **FXJ15321**.

FIG. AS5  $^1\text{H}$ - $^{13}\text{C}$ -HSQC spectrum (600  $\times$  150 MHz,  $\text{CD}_3\text{OD}$ ) of **FXJ15321**.

FIG. AS6  $^1\text{H}$ - $^1\text{H}$ -COSY spectrum (600  $\times$  600 MHz,  $\text{CD}_3\text{OD}$ ) of **FXJ15321**.

FIG. AS7  $^1\text{H}$ - $^{13}\text{C}$ -HMBC spectrum (600  $\times$  150 MHz,  $\text{CD}_3\text{OD}$ ) of **FXJ15321**.

FIG. AS8  $^1\text{H}$ - $^1\text{H}$ -ROESY spectrum (600  $\times$  600 MHz,  $\text{CD}_3\text{OD}$ ) of **FXJ15321**.

FIG. AS9 NOE difference spectrum (H-29 irradiated) (600 MHz,  $\text{CD}_3\text{OD}$ ) of **FXJ15321**

FIG. AS10 HR-ESI-MS spectrum of **FXJ15322**.

FIG. AS11  $^1\text{H}$ -NMR spectrum (600 MHz,  $\text{CD}_3\text{OD}$ ) of **FXJ15322**.

FIG. AS12  $^{13}\text{C}$ -NMR spectrum (150 MHz,  $\text{CD}_3\text{OD}$ ) of **FXJ15322**.

FIG. AS13 DEPT 135 spectrum (150 MHz,  $\text{CD}_3\text{OD}$ ) of **FXJ15322**.

FIG. AS14  $^1\text{H}$ - $^1\text{H}$ -COSY spectrum (600  $\times$  600 MHz,  $\text{CD}_3\text{OD}$ ) of **FXJ15322**.

FIG. AS15  $^1\text{H}$ - $^{13}\text{C}$ -HSQC spectrum (600  $\times$  150 MHz,  $\text{CD}_3\text{OD}$ ) of **FXJ15322**.

FIG. AS16  $^1\text{H}$ - $^{13}\text{C}$ -HMBC spectrum (600  $\times$  150 MHz,  $\text{CD}_3\text{OD}$ ) of **FXJ15322**.

FIG. AS17  $^1\text{H}$ - $^1\text{H}$ -ROESY spectrum (600  $\times$  600 MHz,  $\text{CD}_3\text{OD}$ ) of **FXJ15322**.

FIG. AS18 ESI-MS spectrum of **FXJ10761**.

FIG. AS19  $^1\text{H}$ -NMR spectrum (600 MHz,  $\text{CDCl}_3$ ) of **FXJ10761**.

FIG. AS20  $^{13}\text{C}$ -NMR spectrum (150 MHz,  $\text{CDCl}_3$ ) of **FXJ10761**.

FIG. AS21 DEPT 135 spectrum (150 MHz,  $\text{CDCl}_3$ ) of **FXJ10761**.

FIG. AS22  $^1\text{H}$ - $^1\text{H}$ -COSY spectrum (600  $\times$  600 MHz,  $\text{CDCl}_3$ ) of **FXJ10761**.

FIG. AS23  $^1\text{H}$ - $^{13}\text{C}$ -HSQC spectrum (600  $\times$  150 MHz,  $\text{CDCl}_3$ ) of **FXJ10761**.

FIG. AS24  $^1\text{H}$ - $^{13}\text{C}$ -HMBC spectrum (600  $\times$  150 MHz,  $\text{CDCl}_3$ ) of **FXJ10761**.

FIG. AS25  $^1\text{H}$ - $^1\text{H}$ -ROESY spectrum (600  $\times$  600 MHz,  $\text{CDCl}_3$ ) of **FXJ10761**.

FIG. AS26 HR-ESI-MS spectrum of **FXJ10762**.

FIG. AS27  $^1\text{H}$ -NMR spectrum (600 MHz,  $\text{CDCl}_3$ ) of **FXJ10762**.

FIG. AS28  $^{13}\text{C}$ -NMR spectrum (150 MHz,  $\text{CDCl}_3$ ) of **FXJ10762**.

FIG. AS29 DEPT 135 spectrum (150 MHz,  $\text{CDCl}_3$ ) of **FXJ10762**.

FIG. AS30  $^1\text{H}$ - $^1\text{H}$ -COSY spectrum (600  $\times$  600 MHz,  $\text{CDCl}_3$ ) of **FXJ10762**.

FIG. AS31  $^1\text{H}$ - $^{13}\text{C}$ -HSQC spectrum (600  $\times$  150 MHz,  $\text{CDCl}_3$ ) of **FXJ10762**.

FIG. AS32  $^1\text{H}$ - $^{13}\text{C}$ -HMBC spectrum (600  $\times$  150 MHz,  $\text{CDCl}_3$ ) of **FXJ10762**.

FIG. AS33  $^1\text{H}$ - $^1\text{H}$ -ROESY spectrum (600  $\times$  600 MHz,  $\text{CDCl}_3$ ) of **FXJ10762**.

FIG. AS34 HR-ESI-MS spectrum of **FXJ10763**.

FIG. AS35  $^1\text{H}$ -NMR spectrum (600 MHz,  $\text{CDCl}_3$ ) of **FXJ10763**.

FIG. AS36  $^{13}\text{C}$ -NMR spectrum (150 MHz,  $\text{CDCl}_3$ ) of **FXJ10763**.

FIG. AS37 DEPT 135 spectrum (150 MHz,  $\text{CDCl}_3$ ) of **FXJ10763**.

FIG. AS38  $^1\text{H}$ - $^1\text{H}$ -COSY spectrum (600  $\times$  600 MHz,  $\text{CDCl}_3$ ) of **FXJ10763**.

FIG. AS39  $^1\text{H}$ - $^{13}\text{C}$ -HSQC spectrum (600  $\times$  150 MHz,  $\text{CDCl}_3$ ) of **FXJ10763**.

FIG. AS40  $^1\text{H}$ - $^{13}\text{C}$ -HMBC spectrum (600  $\times$  150 MHz,  $\text{CDCl}_3$ ) of **FXJ10763**.

**FIG AS1** HR-ESI-MS spectrum of **FXJ15321**

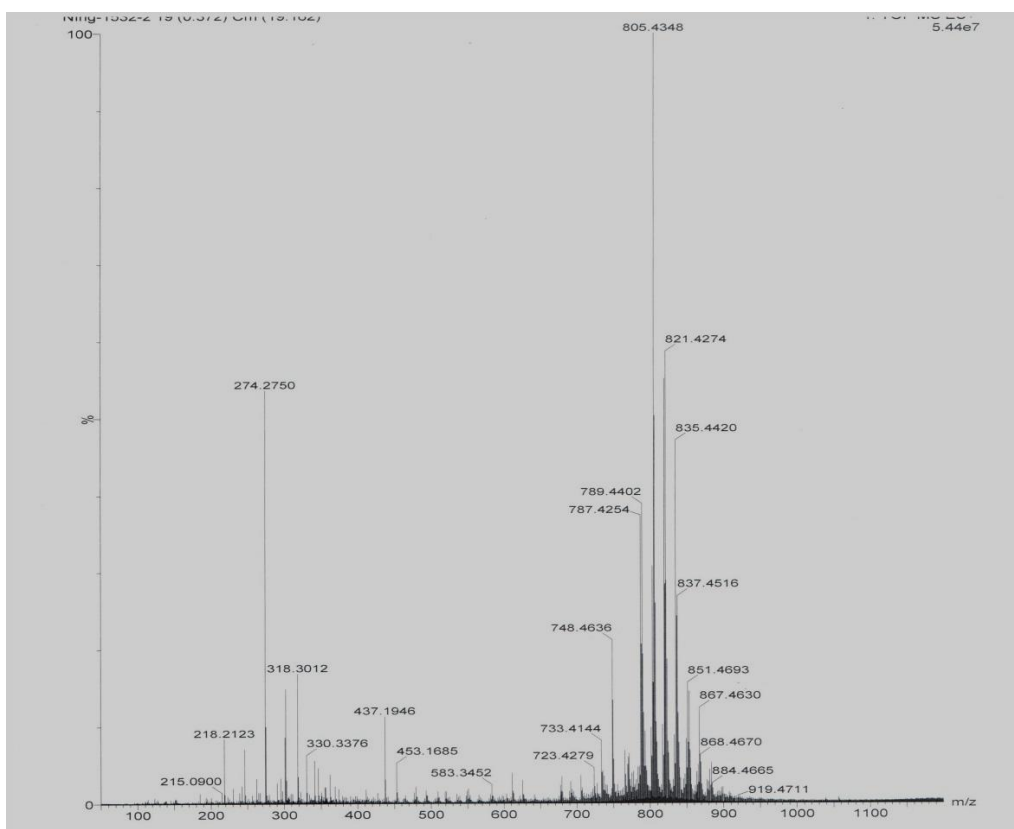

**FIG AS2**  $^1\text{H-NMR}$  spectrum (600 MHz,  $\text{CD}_3\text{OD}$ ) of **FXJ15321**

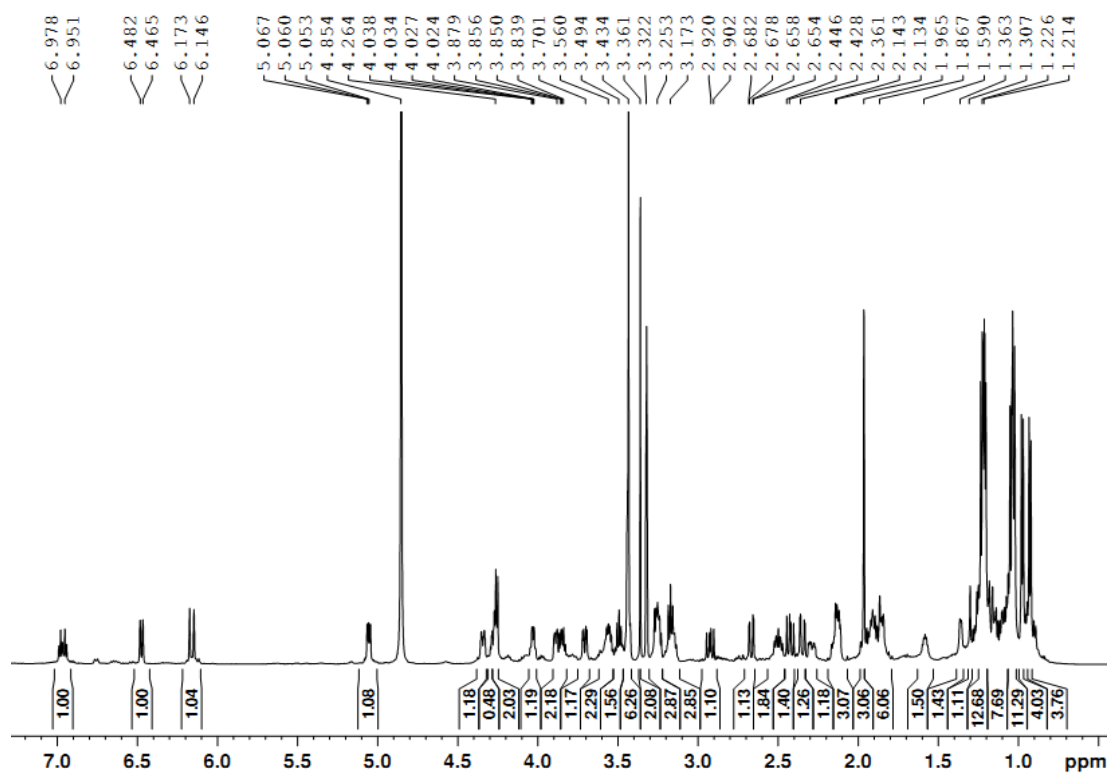

**FIG AS3**  $^{13}\text{C}$ -NMR spectrum (150 MHz,  $\text{CD}_3\text{OD}$ ) of **FXJ15321**

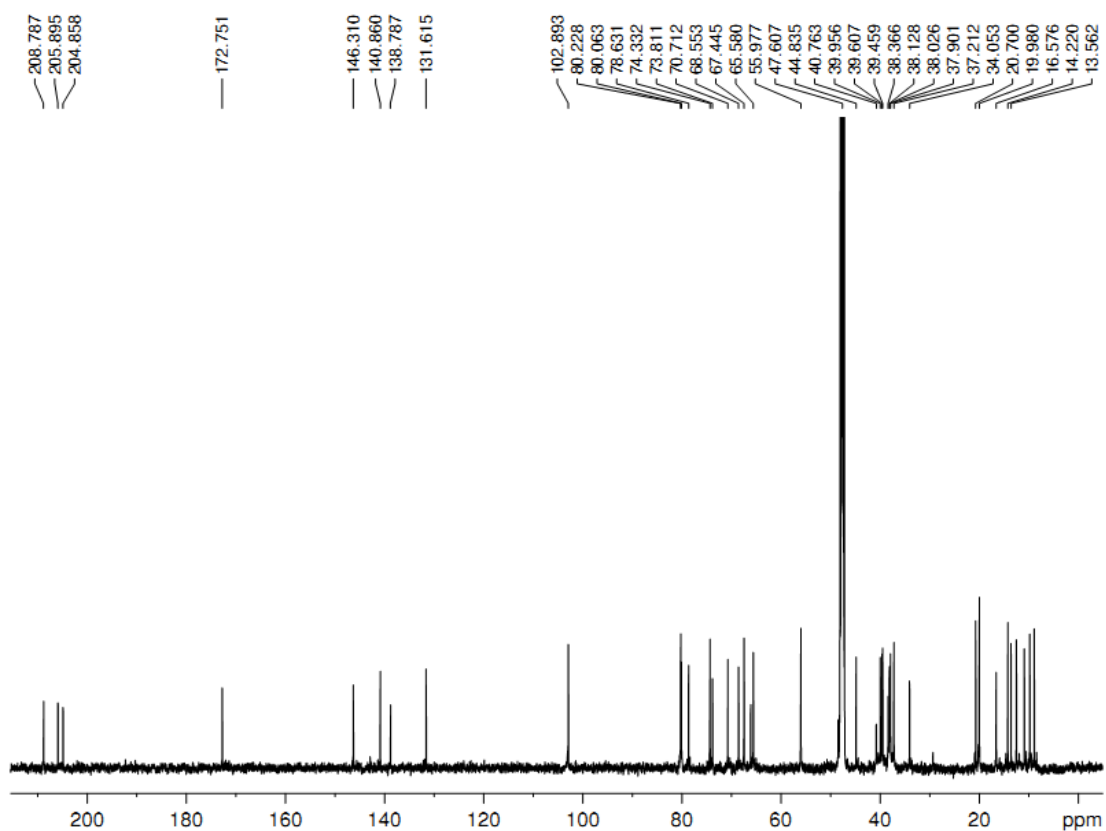

**FIG AS4** DEPT135 spectrum (150 MHz,  $\text{CD}_3\text{OD}$ ) of **FXJ15321**

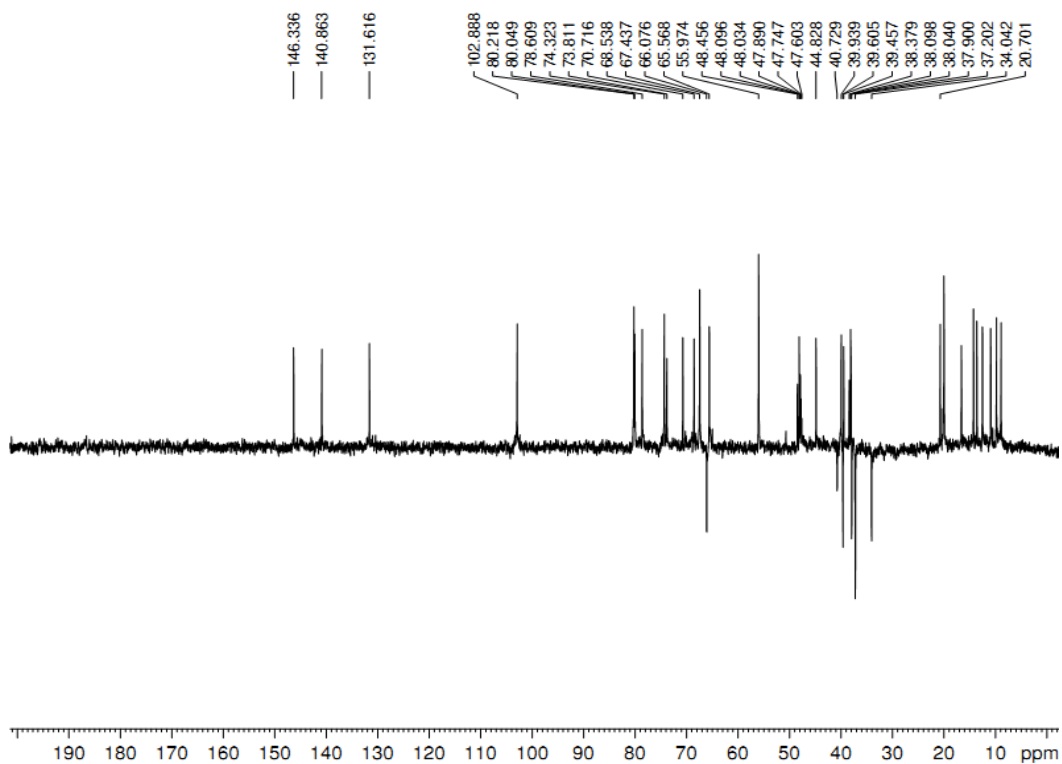

FIG AS5  $^1\text{H}$ - $^{13}\text{C}$ -HSQC spectrum ( $600 \times 150$  MHz,  $\text{CD}_3\text{OD}$ ) of FXJ15321

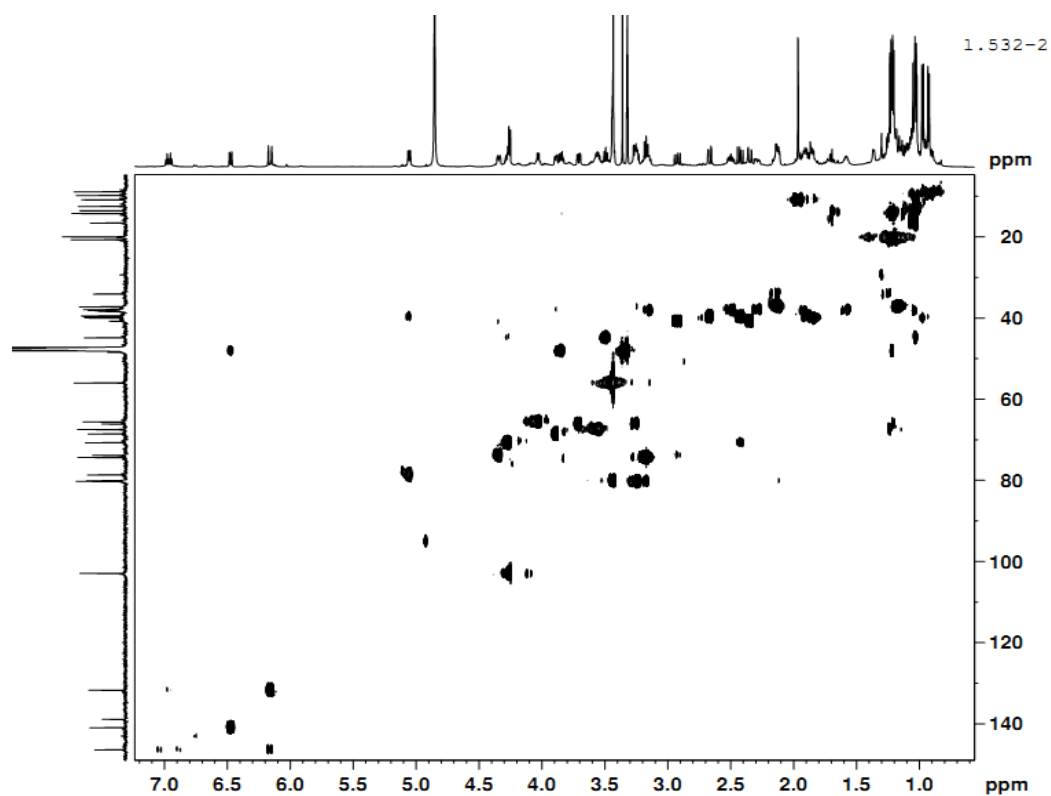

FIG AS6  $^1\text{H}$ - $^1\text{H}$ -COSY spectrum ( $600 \times 600$  MHz,  $\text{CD}_3\text{OD}$ ) of FXJ15321

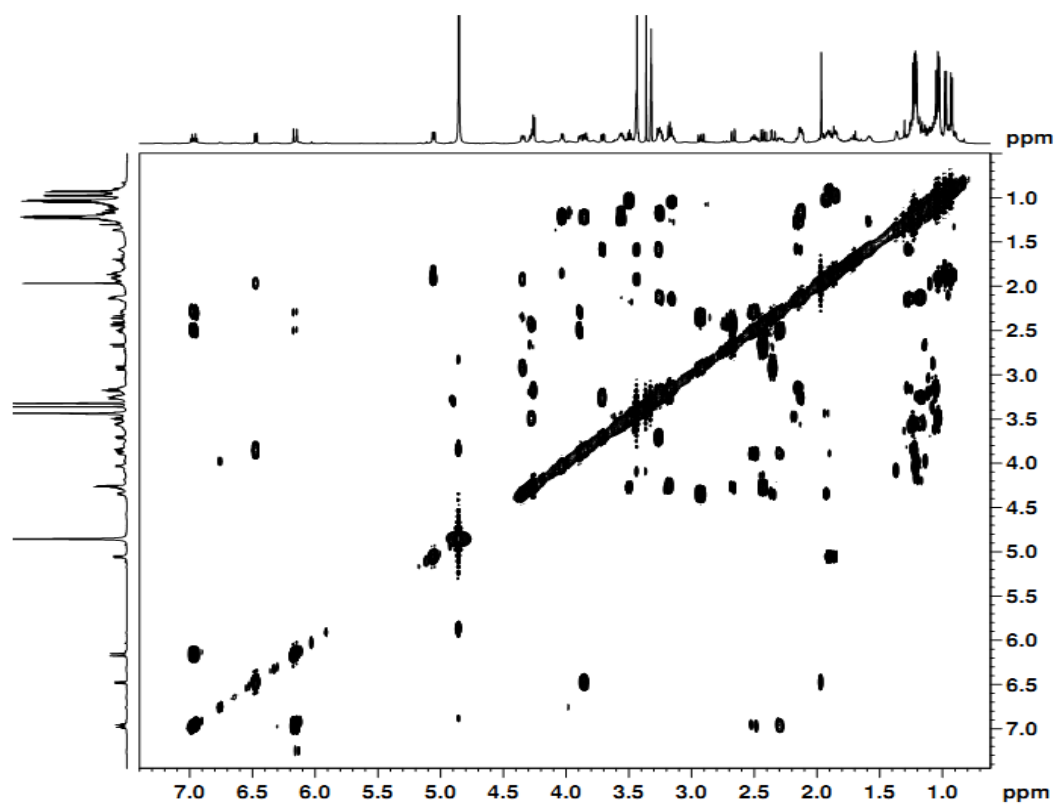

FIG AS7  $^1\text{H}$ - $^{13}\text{C}$ -HMBC spectrum (600  $\times$  150 MHz,  $\text{CD}_3\text{OD}$ ) of FXJ15321

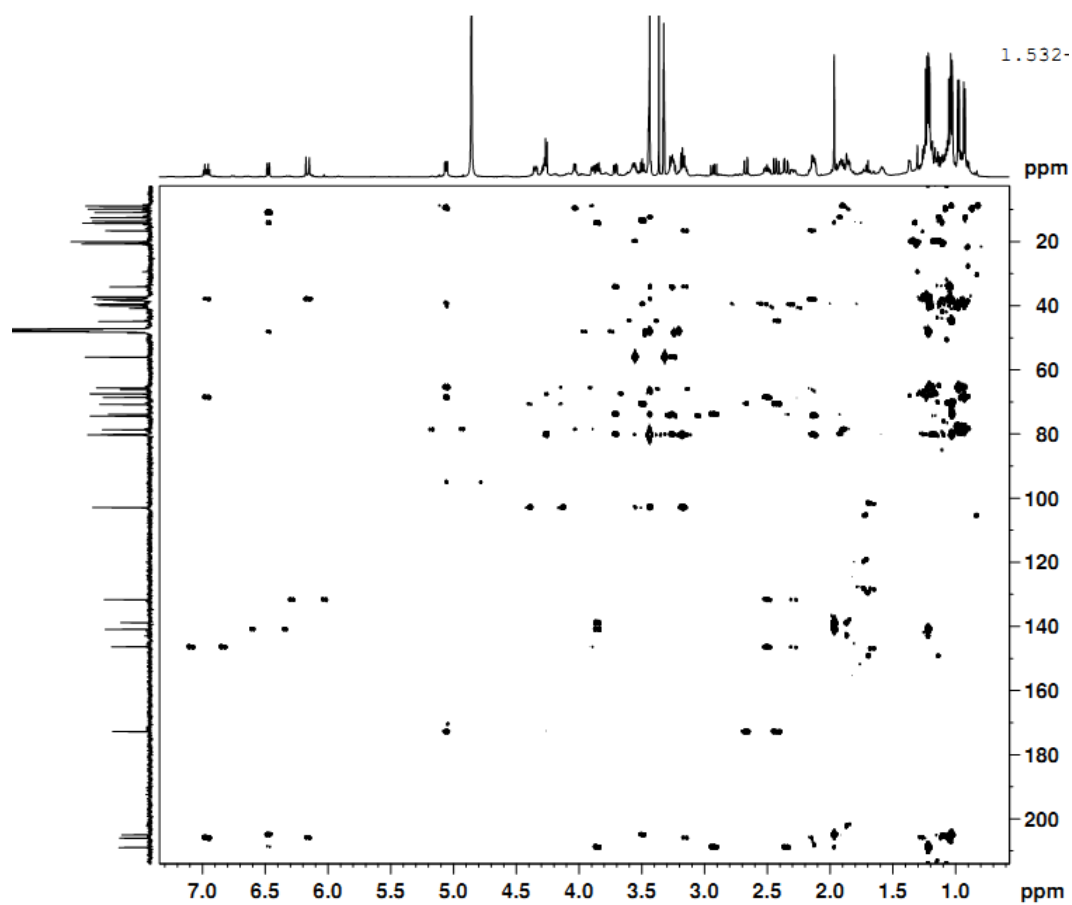

FIG AS8  $^1\text{H}$ - $^1\text{H}$ -ROESY spectrum (600  $\times$  600 MHz,  $\text{CD}_3\text{OD}$ ) of FXJ15321

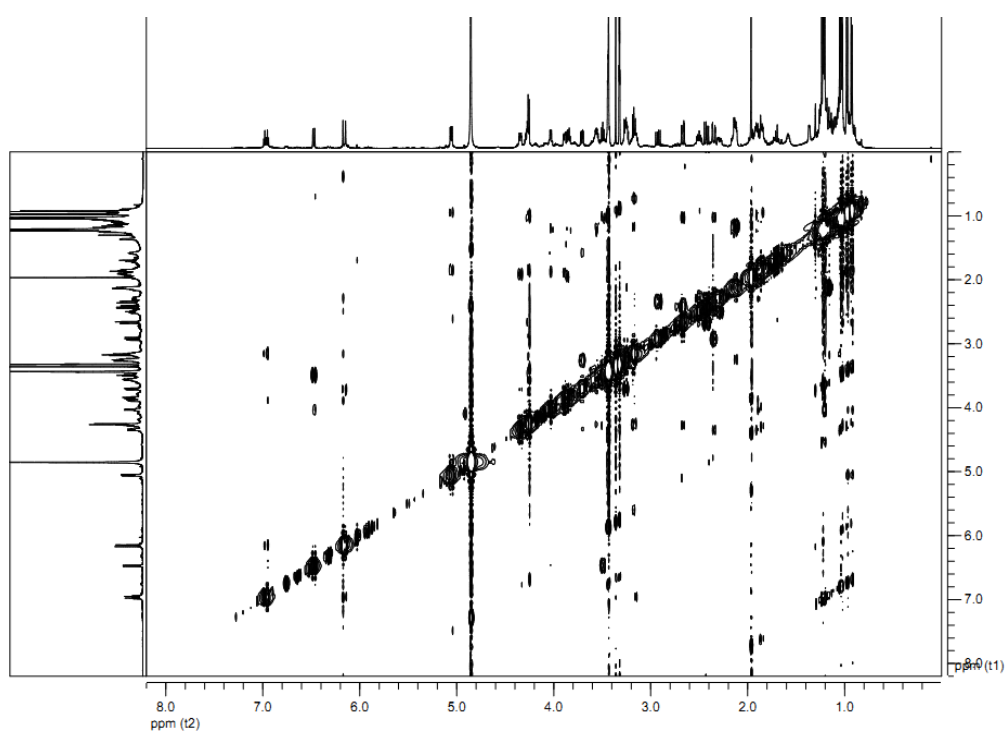

**FIG AS9** NOE difference spectrum (H-29 irradiated) (600 MHz,  $CD_3OD$ ) of **FXJ15321**

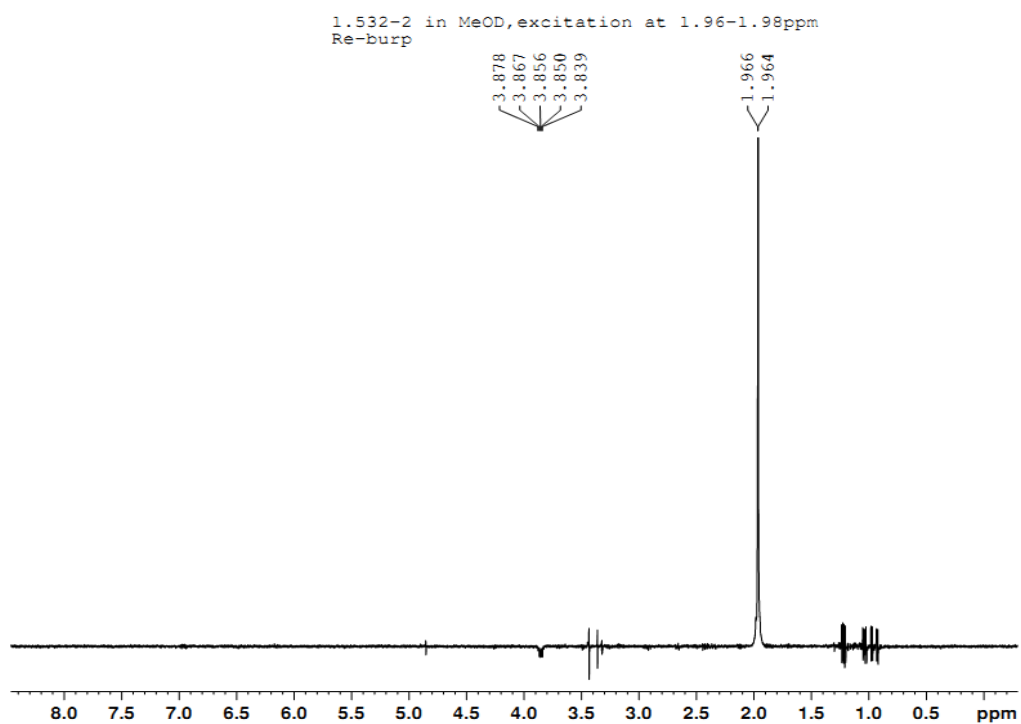

**FIG AS10** HR-ESI-MS spectrum of **FXJ15322**

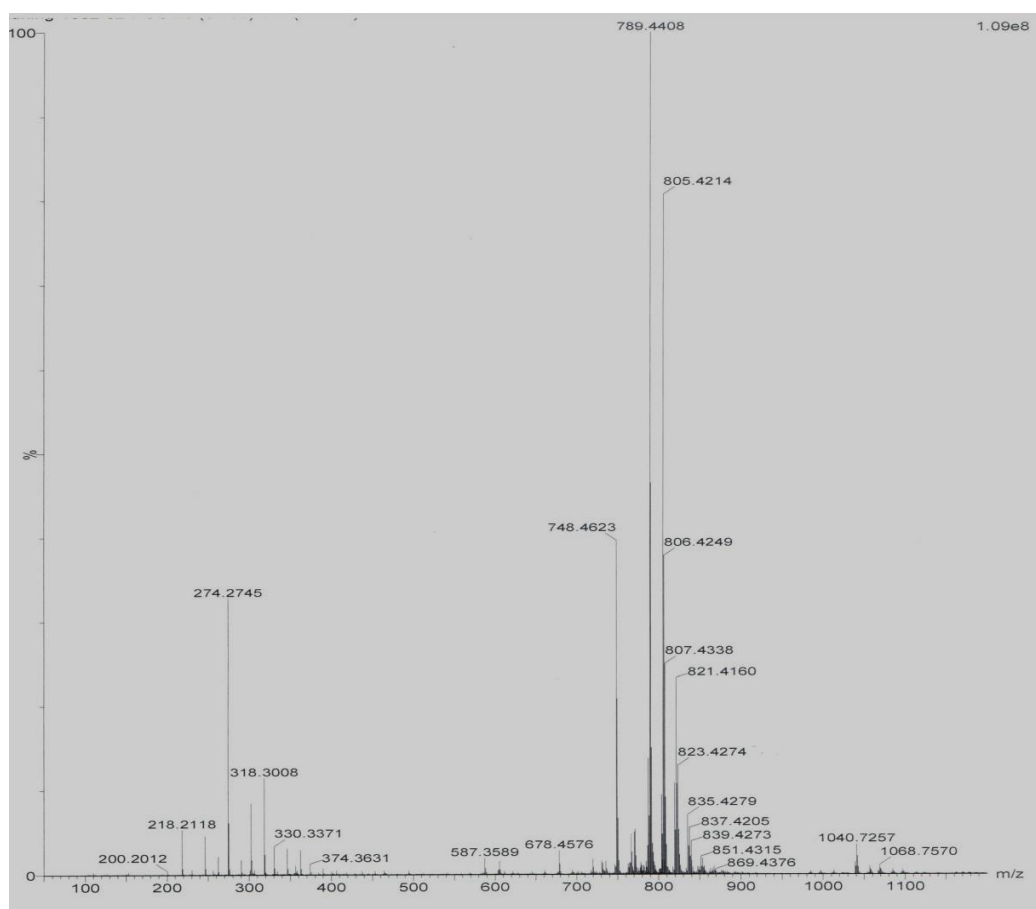

FIG AS11  $^1\text{H-NMR}$  spectrum (600 MHz,  $\text{CD}_3\text{OD}$ ) of FXJ15322

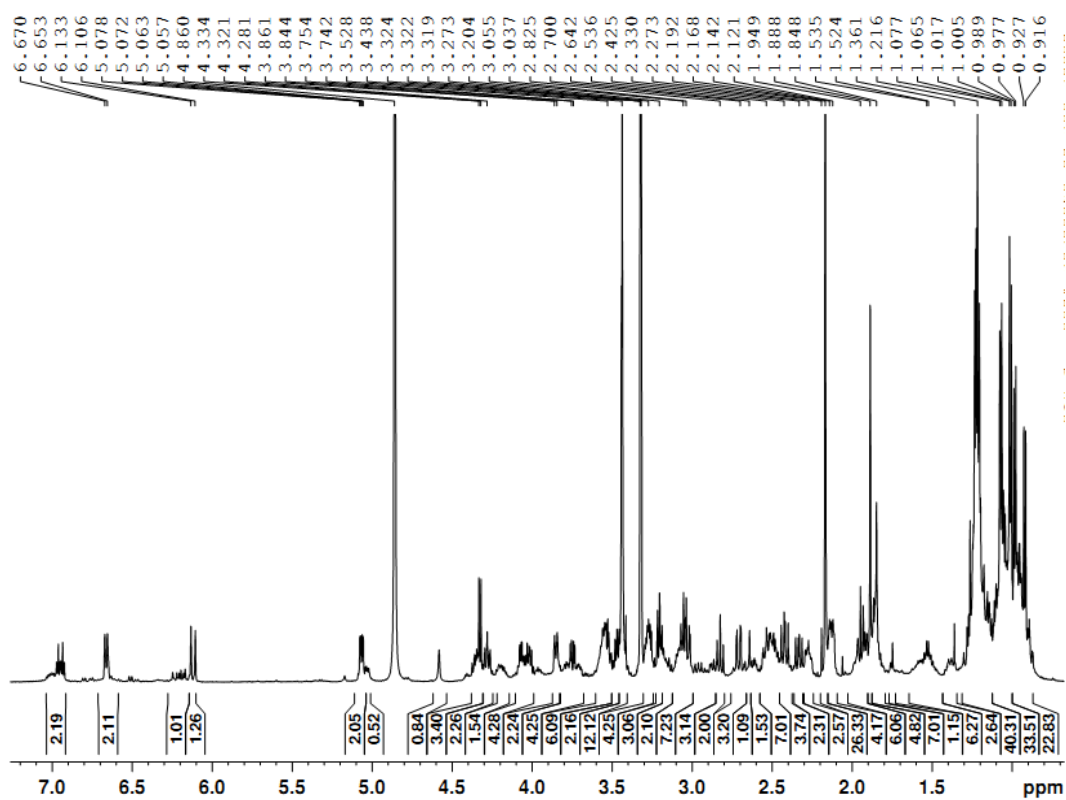

FIG AS12  $^{13}\text{C-NMR}$  spectrum (150 MHz,  $\text{CD}_3\text{OD}$ ) of FXJ15322

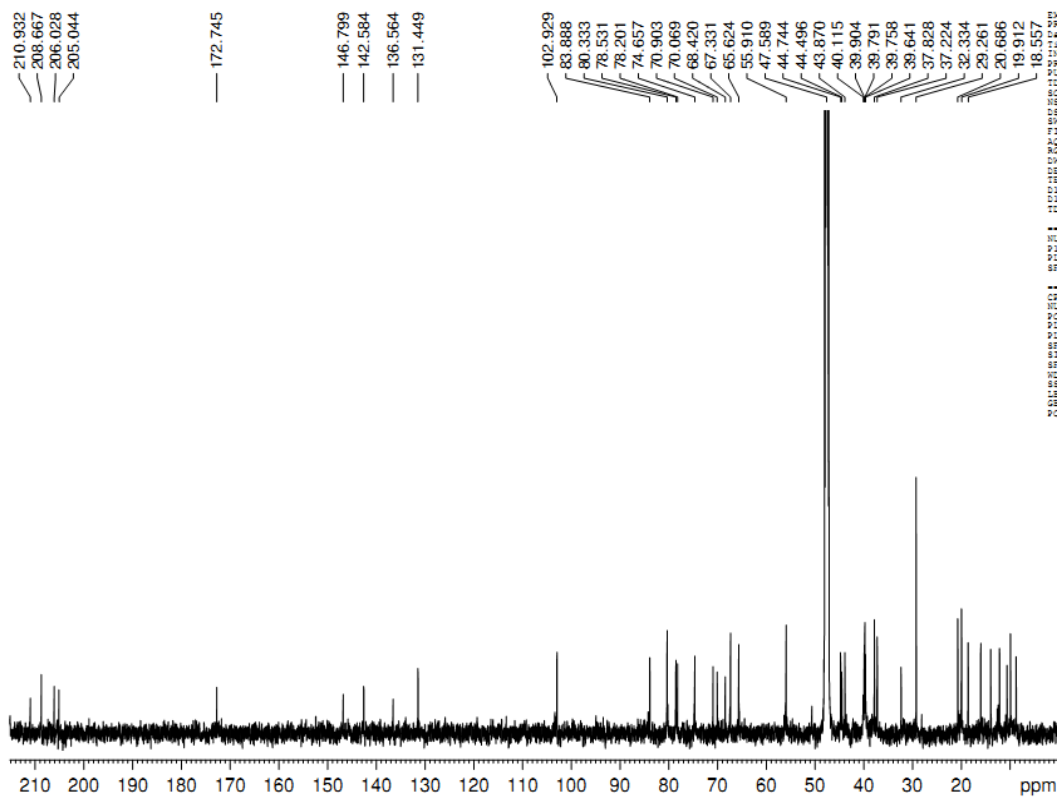

**FIG AS13** DEPT135 spectrum (150 MHz,  $CD_3OD$ ) of **FXJ15322**

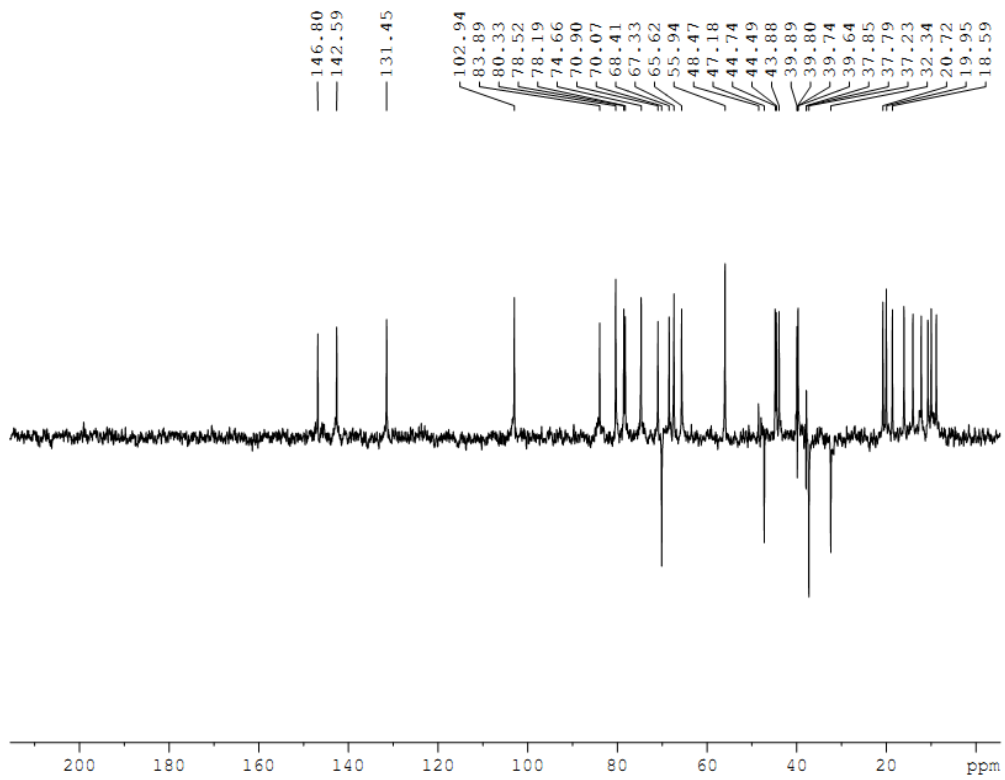

**FIG AS14**  $^1H$ - $^1H$ -COSY spectrum (600  $\times$  600 MHz,  $CD_3OD$ ) of **FXJ15322**

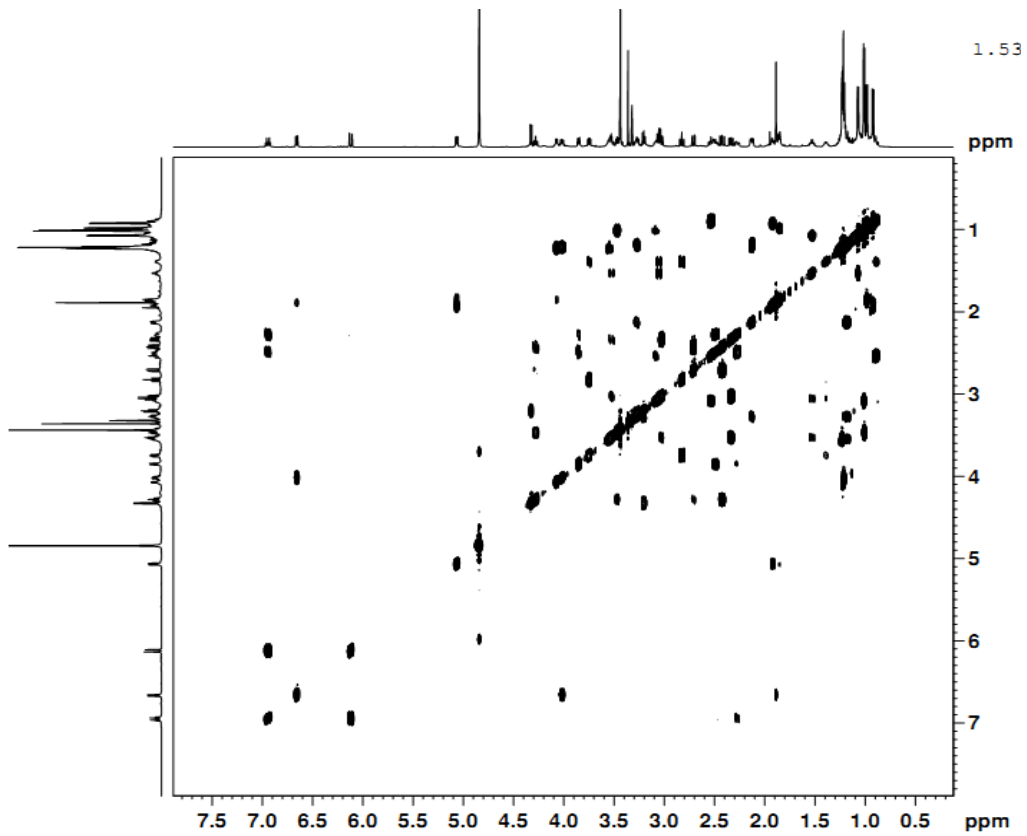



FIG AS15  $^1\text{H}$ - $^{13}\text{C}$ -HSQC spectrum (600  $\times$  150 MHz,  $\text{CD}_3\text{OD}$ ) of FXJ15322

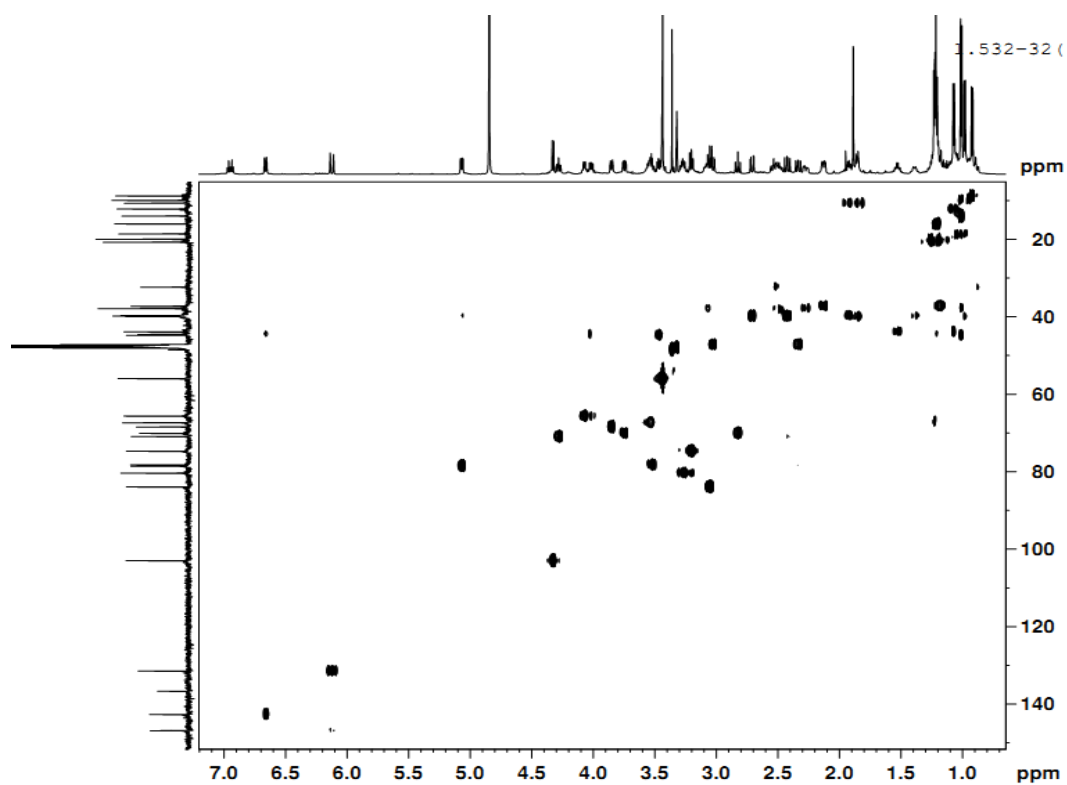

FIG AS16  $^1\text{H}$ - $^{13}\text{C}$ -HMBC spectrum (600  $\times$  150 MHz,  $\text{CD}_3\text{OD}$ ) of FXJ15322

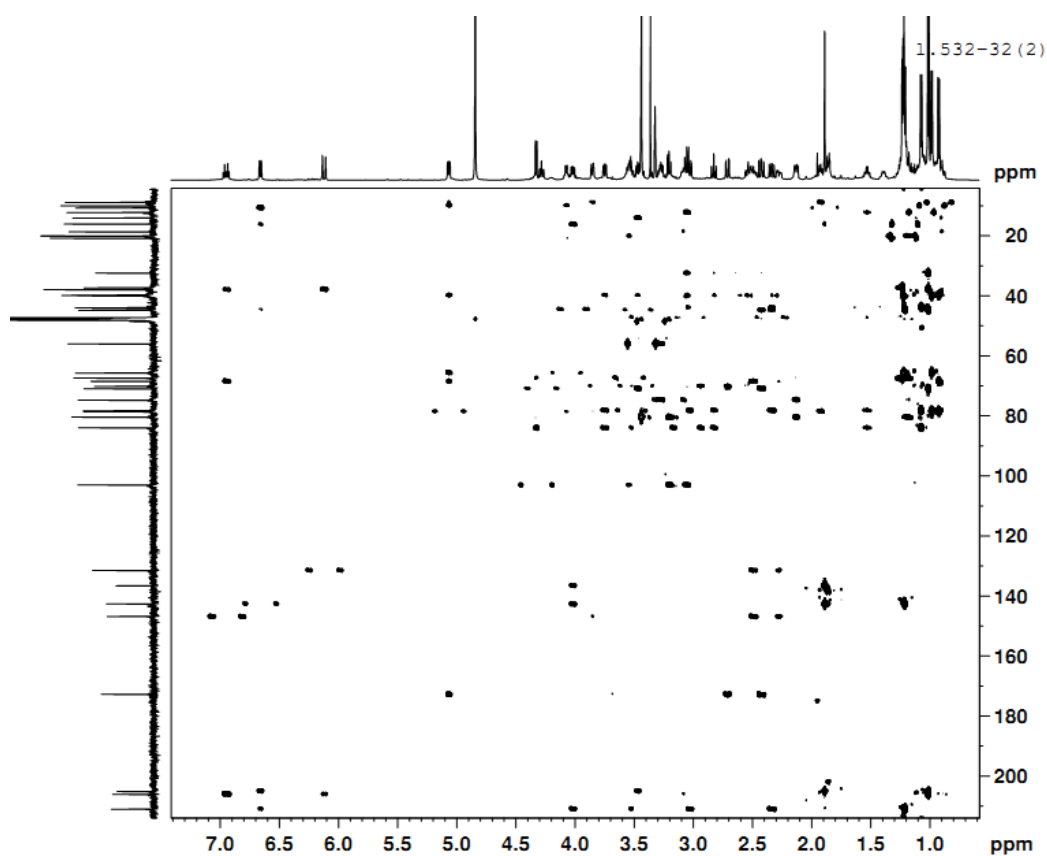

**FIG AS17**  $^1\text{H}$ - $^1\text{H}$ -ROESY spectrum (600  $\times$  600 MHz,  $\text{CD}_3\text{OD}$ ) of **FXJ15322**

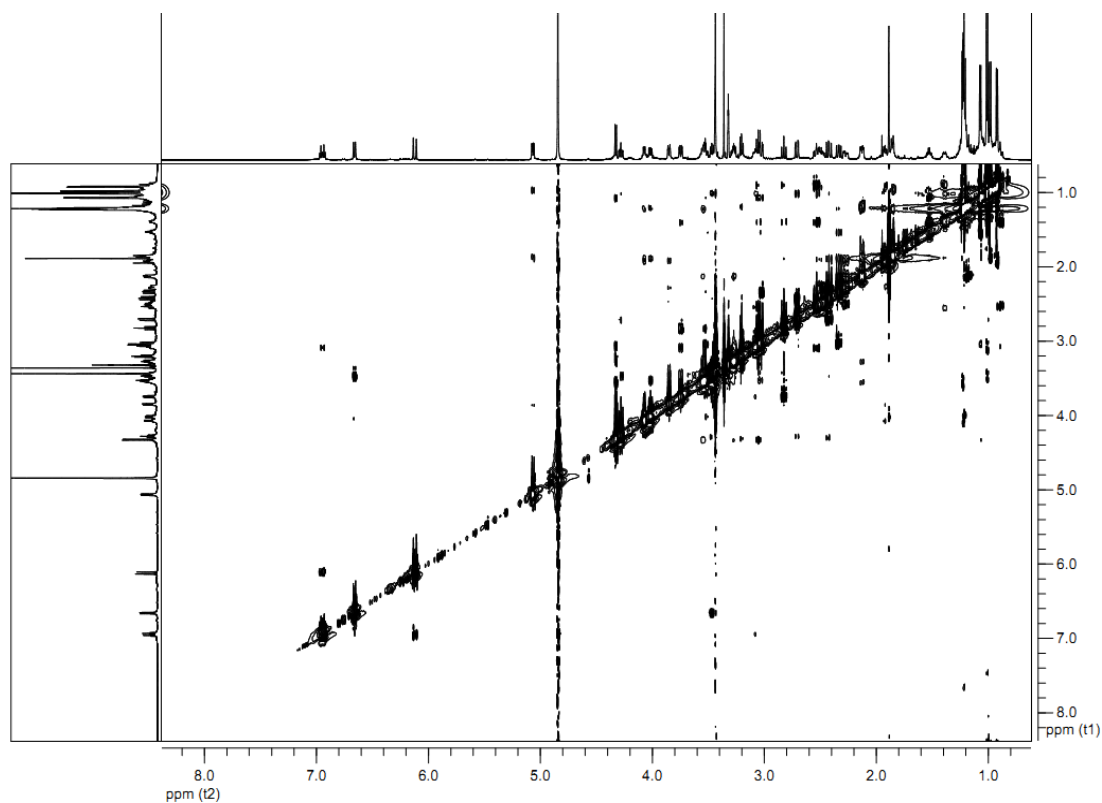

**FIG AS18** ESI-MS spectrum of **FXJ10761**

DSM13-5 #110 RT: 3.14 AV: 1 NL: 2.18E8  
T: + c ESI Full ms [ 205.00-2000.00]

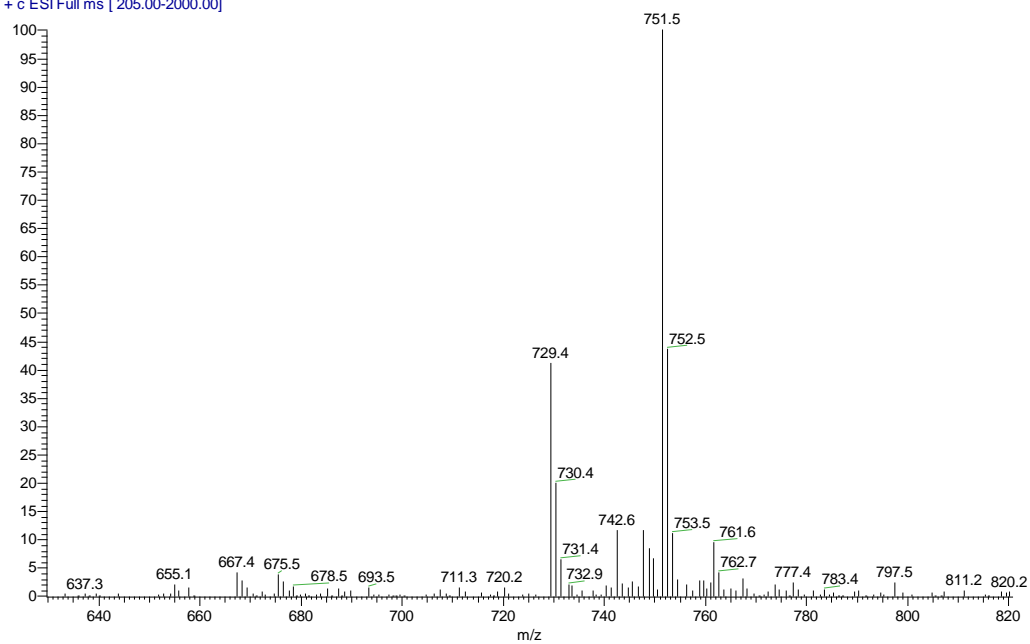

**FIG AS19**  $^1\text{H}$ -NMR spectrum (600 MHz,  $\text{CDCl}_3$ ) of **FXJ10761**

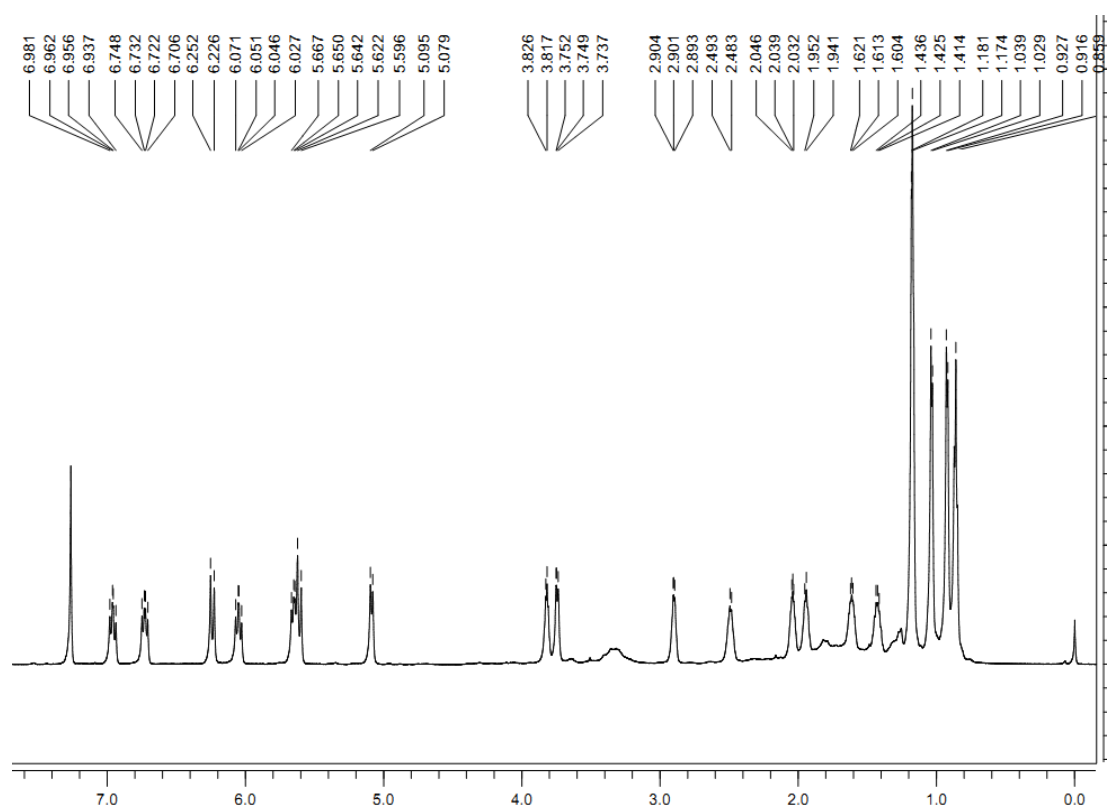

**FIG AS20**  $^{13}\text{C}$ -NMR spectrum (150 MHz,  $\text{CDCl}_3$ ) of **FXJ10761**

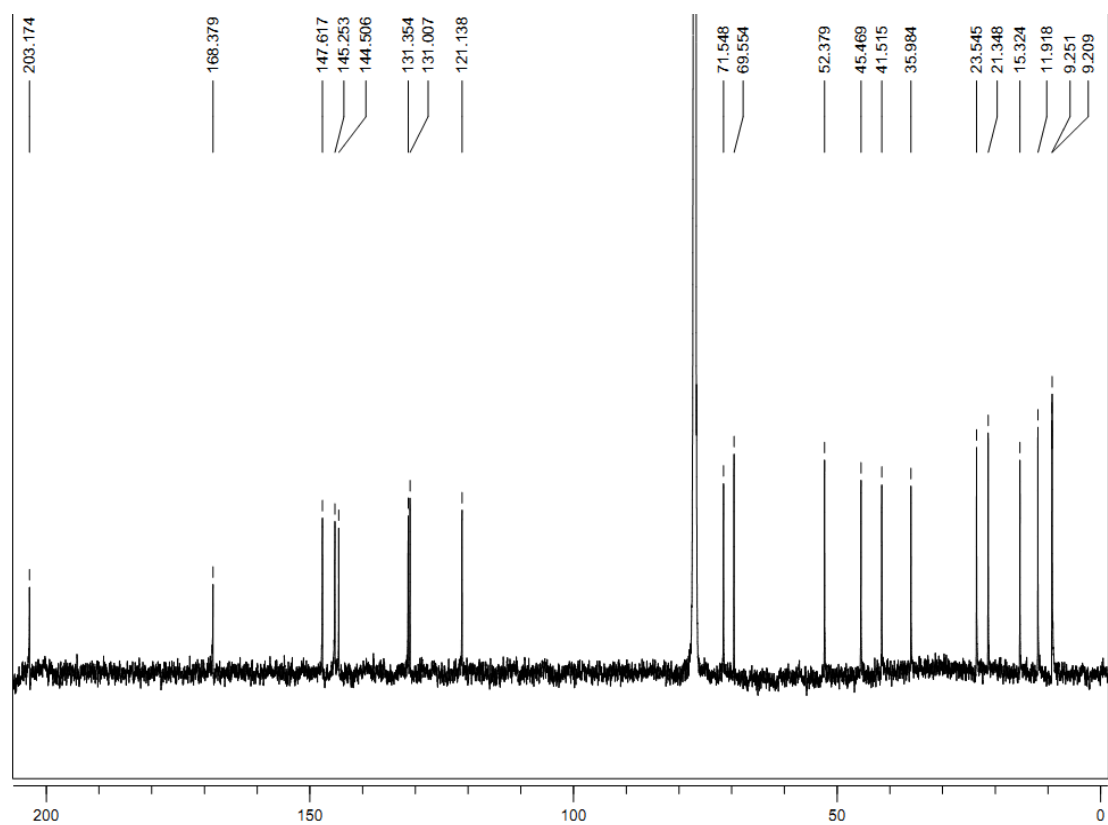

**FIG AS21** DEPT 135 spectrum (150 MHz,  $CDCl_3$ ) of **FXJ10761**

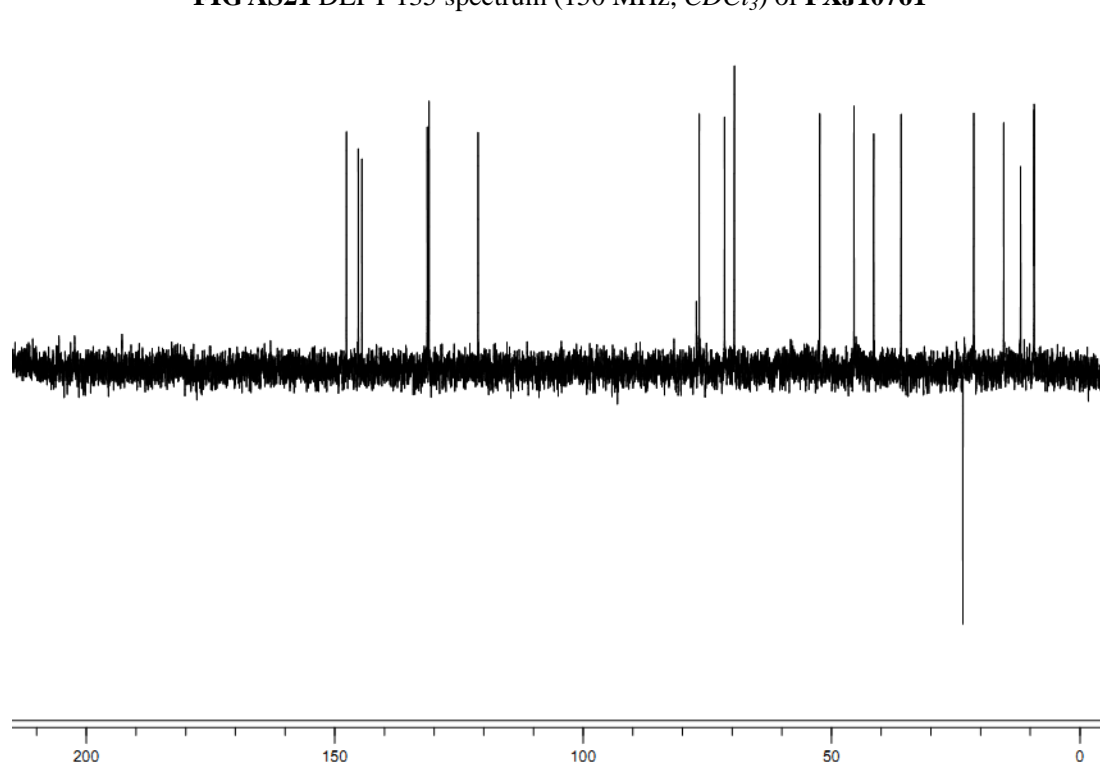

**FIG AS22**  $^1H$ - $^1H$ -COSY spectrum (600  $\times$  600 MHz,  $CDCl_3$ ) of **FXJ10761**

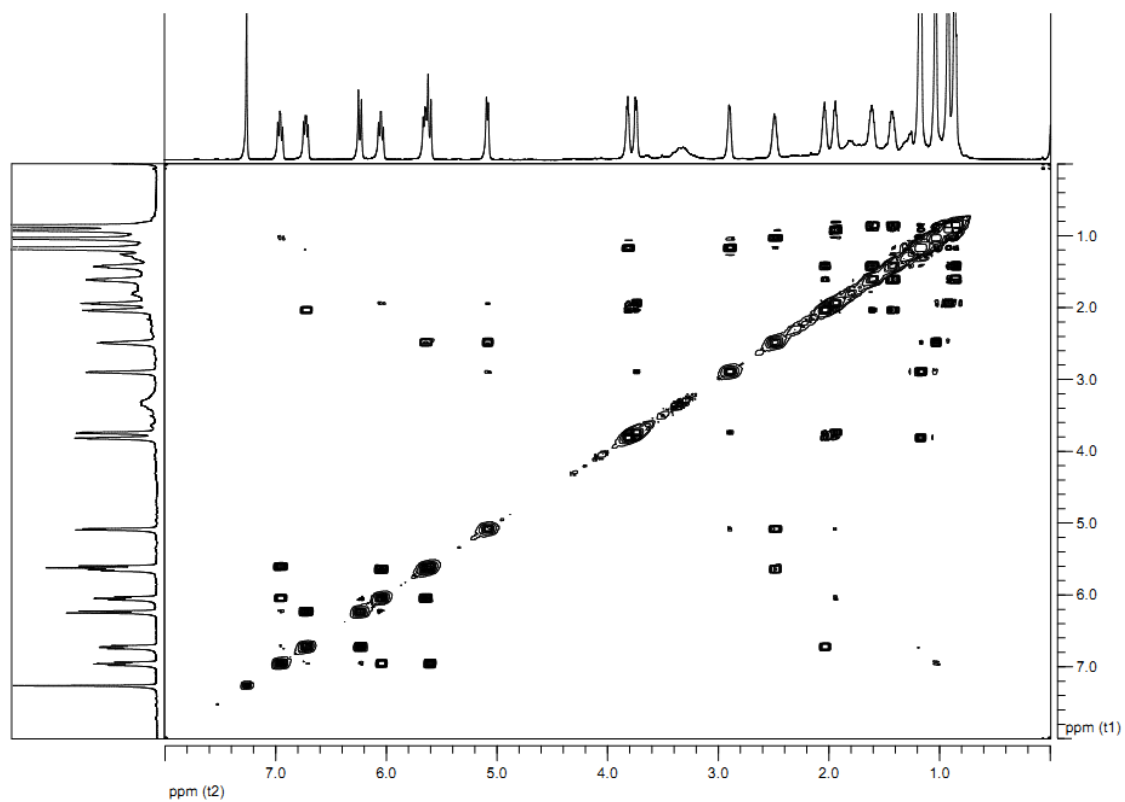

**FIG AS23**  $^1\text{H}$ - $^{13}\text{C}$ -HSQC spectrum (600  $\times$  150 MHz,  $\text{CDCl}_3$ ) of **FXJ10761**

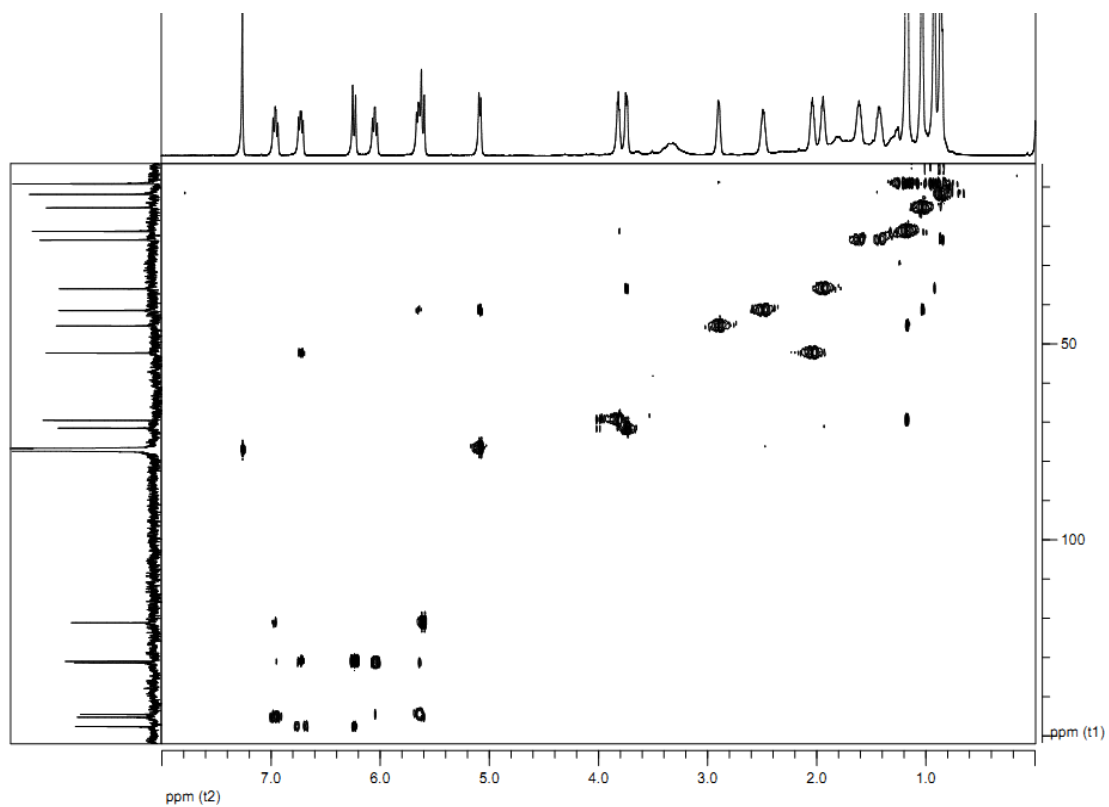

**FIG AS24**  $^1\text{H}$ - $^{13}\text{C}$ -HMBC spectrum (600  $\times$  150 MHz,  $\text{CDCl}_3$ ) of **FXJ10761**

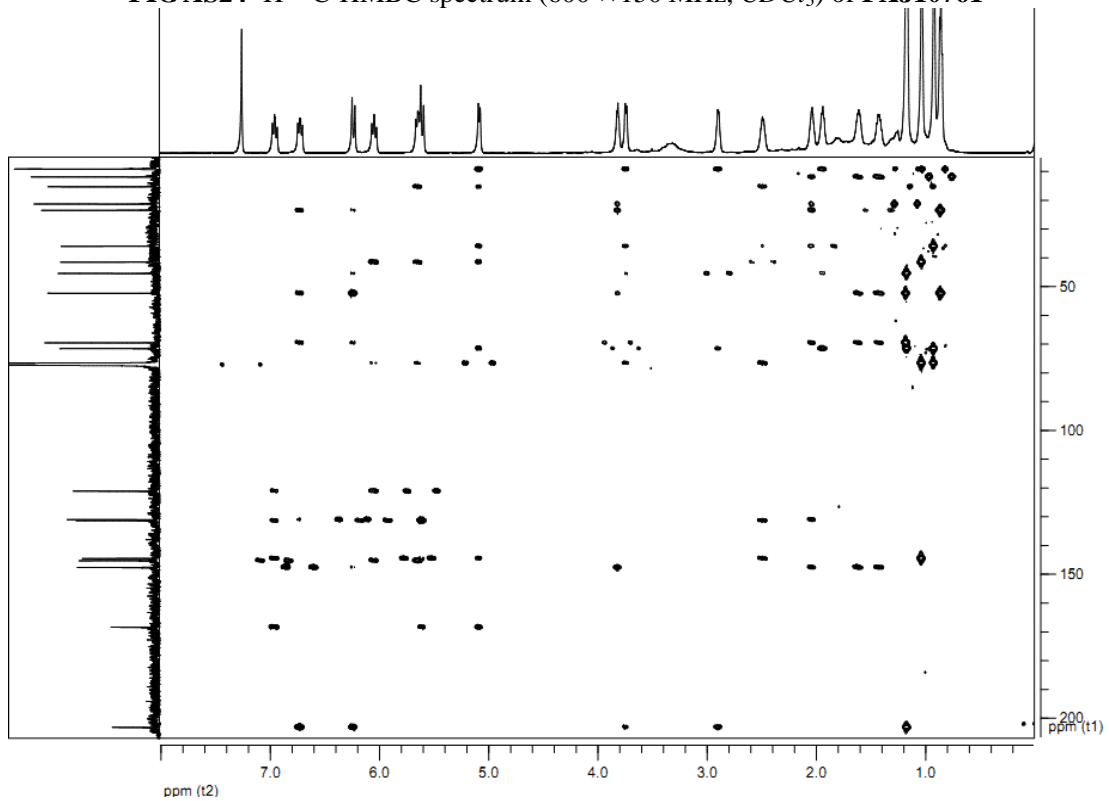

**FIG AS25**  $^1\text{H}$ - $^1\text{H}$ -ROESY spectrum ( $600 \times 600$  MHz,  $\text{CDCl}_3$ ) of **FXJ10761**

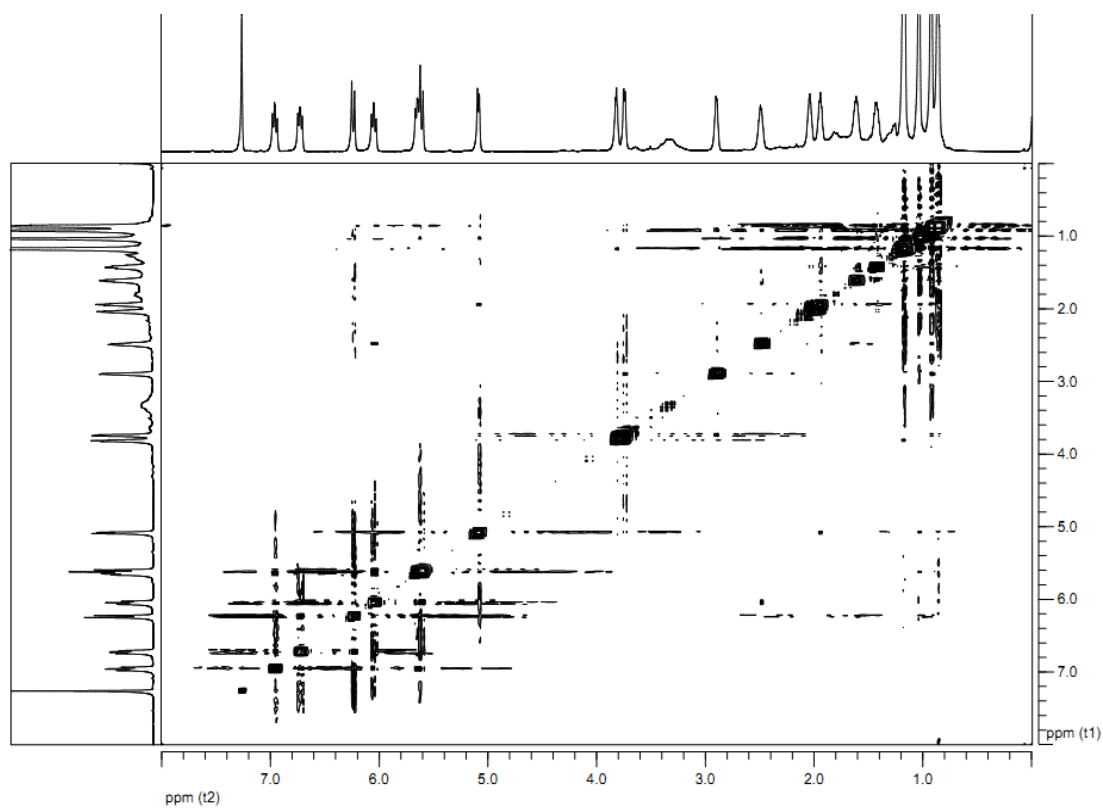

**FIG AS26** HR-ESI-MS spectrum of **FXJ10762**

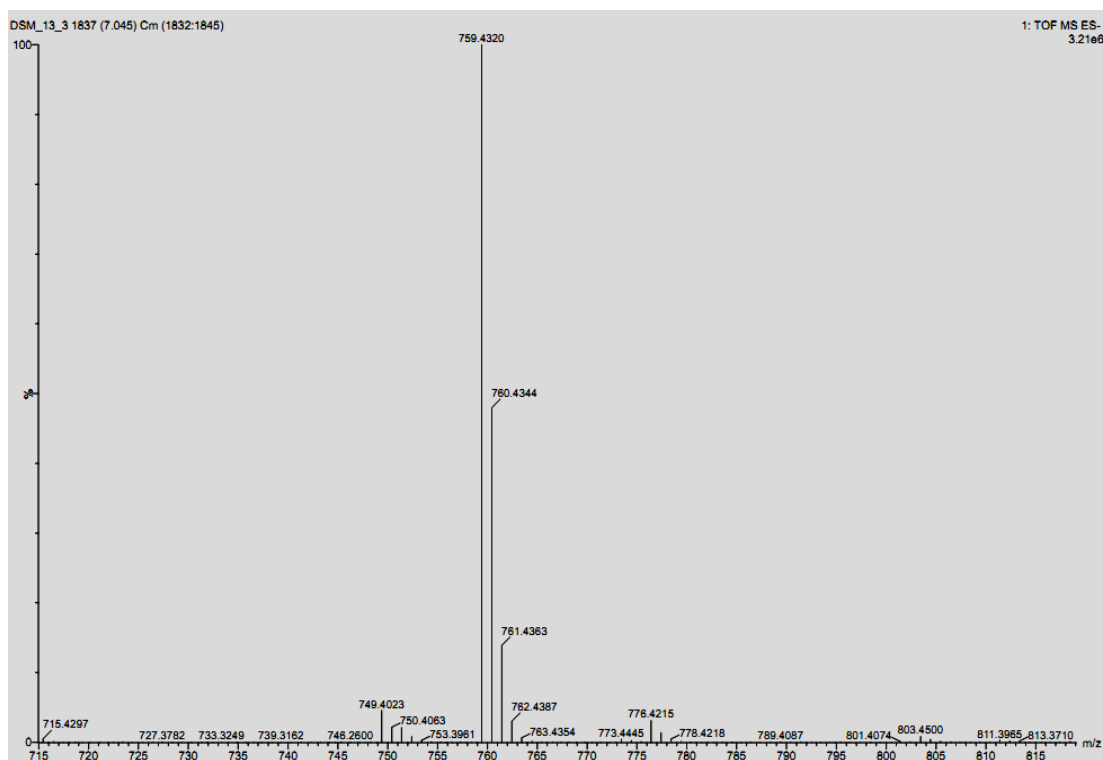

**FIG AS27**  $^1\text{H}$ -NMR spectrum (600 MHz,  $\text{CDCl}_3$ ) of **FXJ10762**

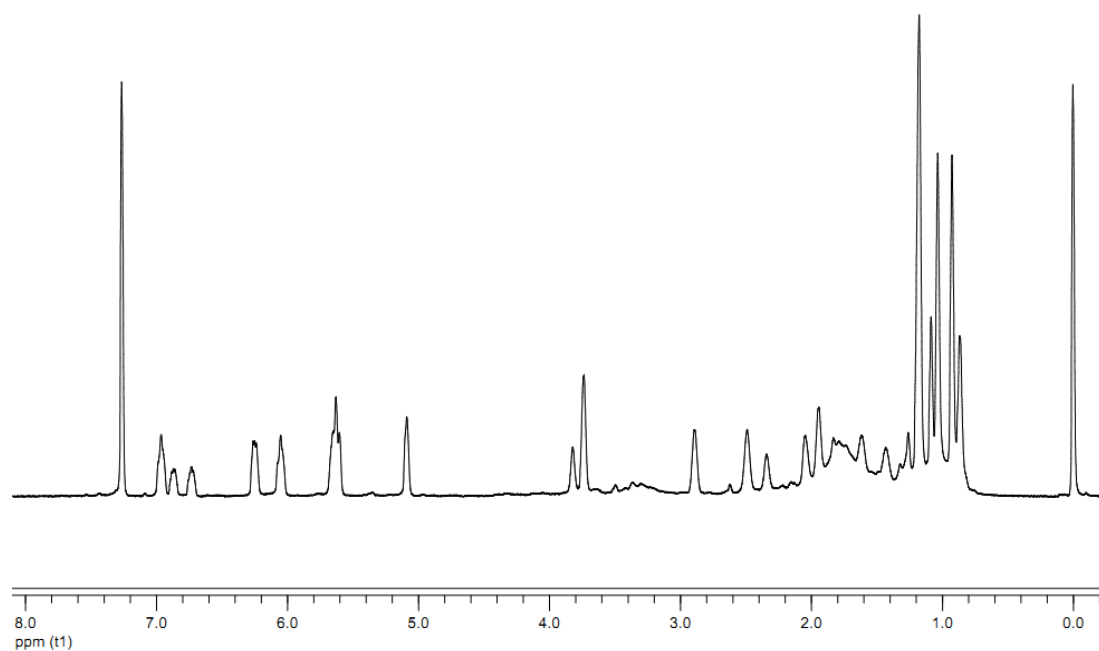

**FIG AS28**  $^{13}\text{C}$ -NMR spectrum (150 MHz,  $\text{CDCl}_3$ ) of **FXJ10762**

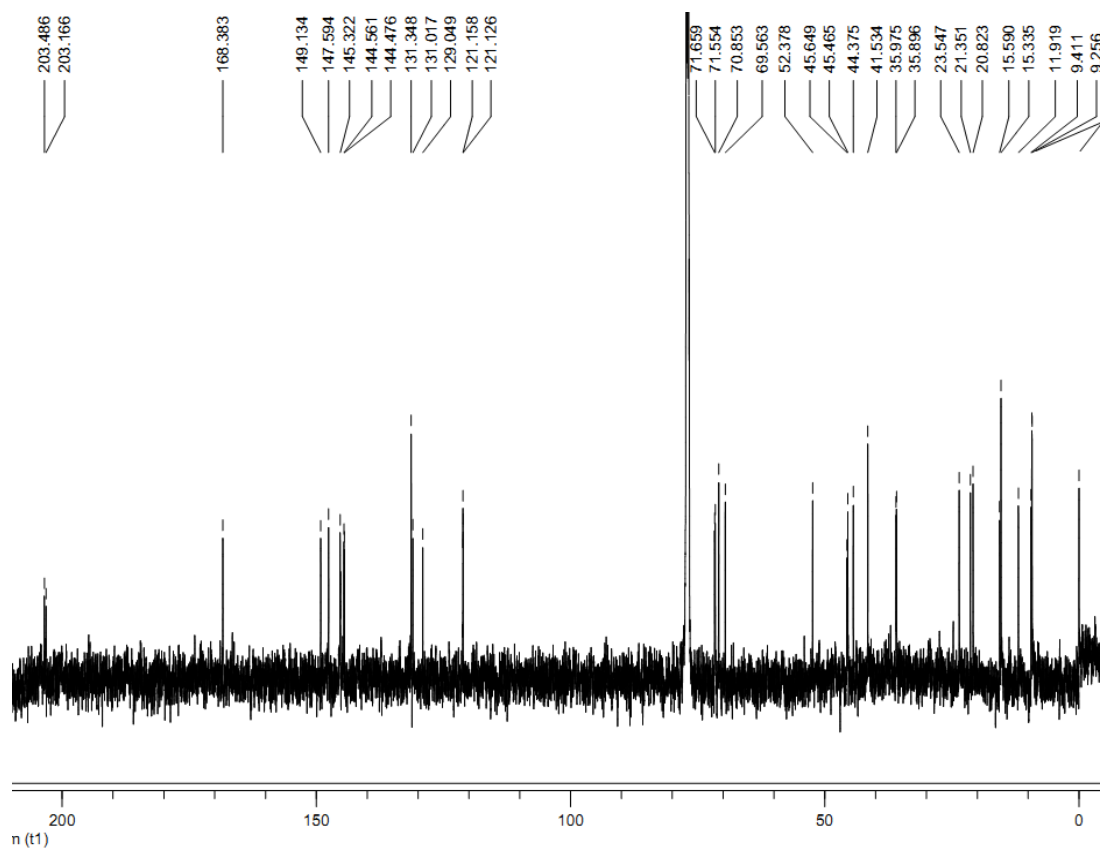

**FIG AS29** DEPT 135 spectrum (150 MHz,  $CDCl_3$ ) of **FXJ10762**

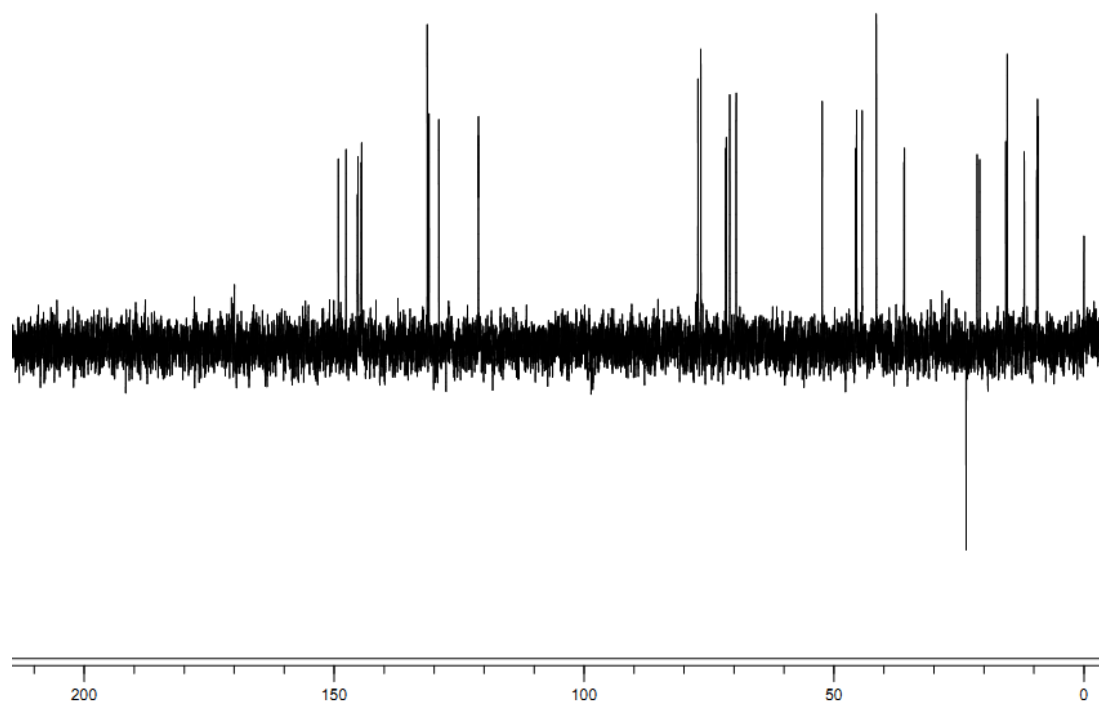

**FIG AS30**  $^1H$ - $^1H$ -COSY spectrum (600  $\times$  600 MHz,  $CDCl_3$ ) of **FXJ10762**

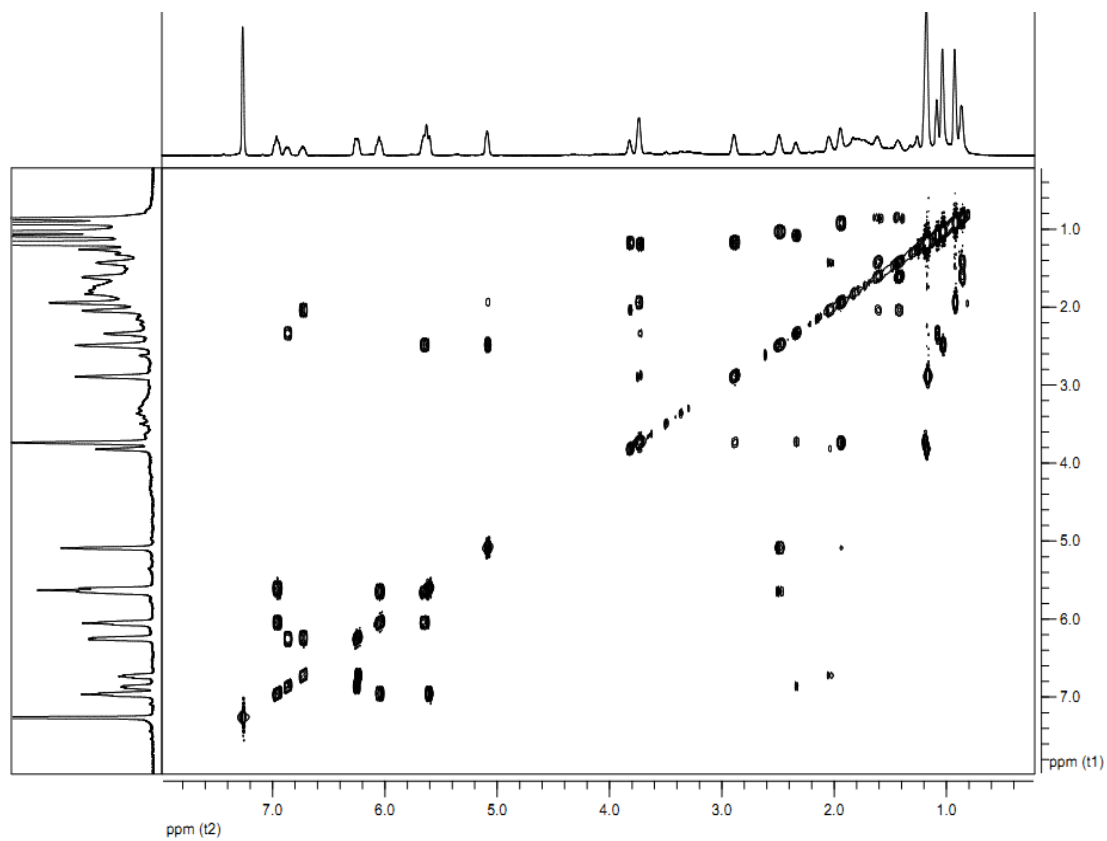



**FIG AS31**  $^1\text{H}$ - $^{13}\text{C}$ -HSQC spectrum (600  $\times$  150 MHz,  $\text{CDCl}_3$ ) of **FXJ10762**

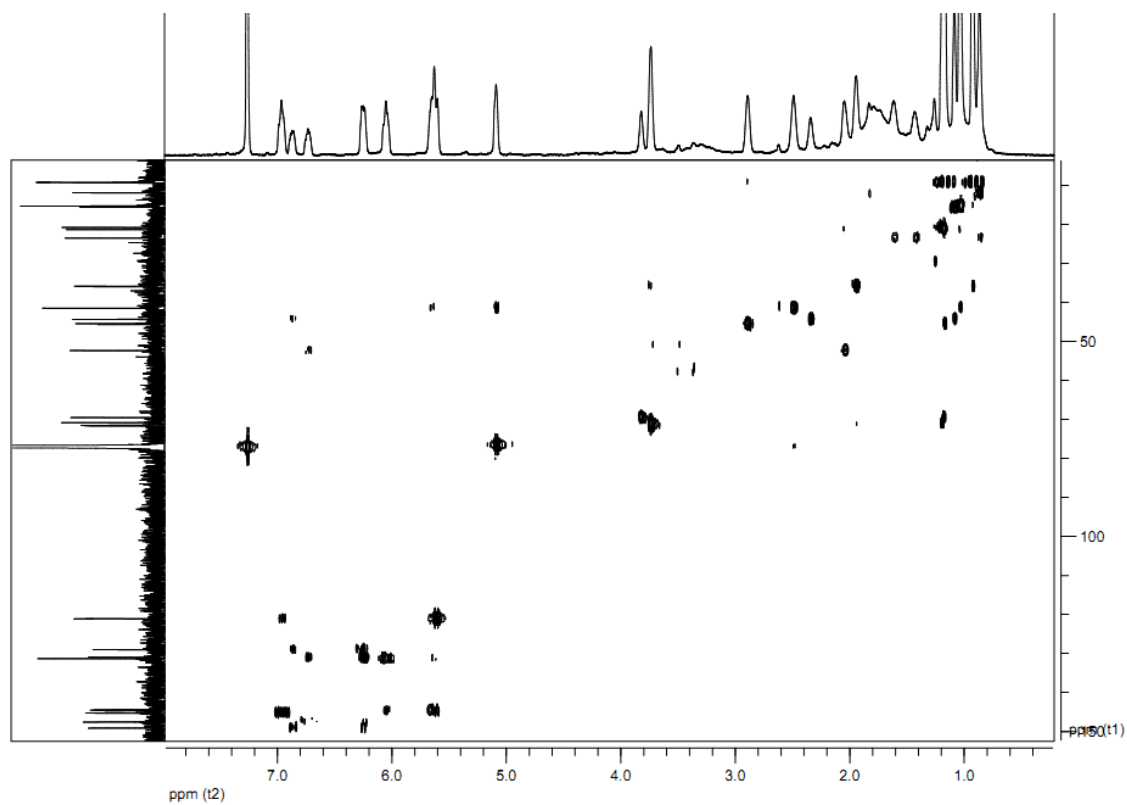

**FIG AS32**  $^1\text{H}$ - $^{13}\text{C}$ -HMBC spectrum (600  $\times$  150 MHz,  $\text{CDCl}_3$ ) of **FXJ10762**

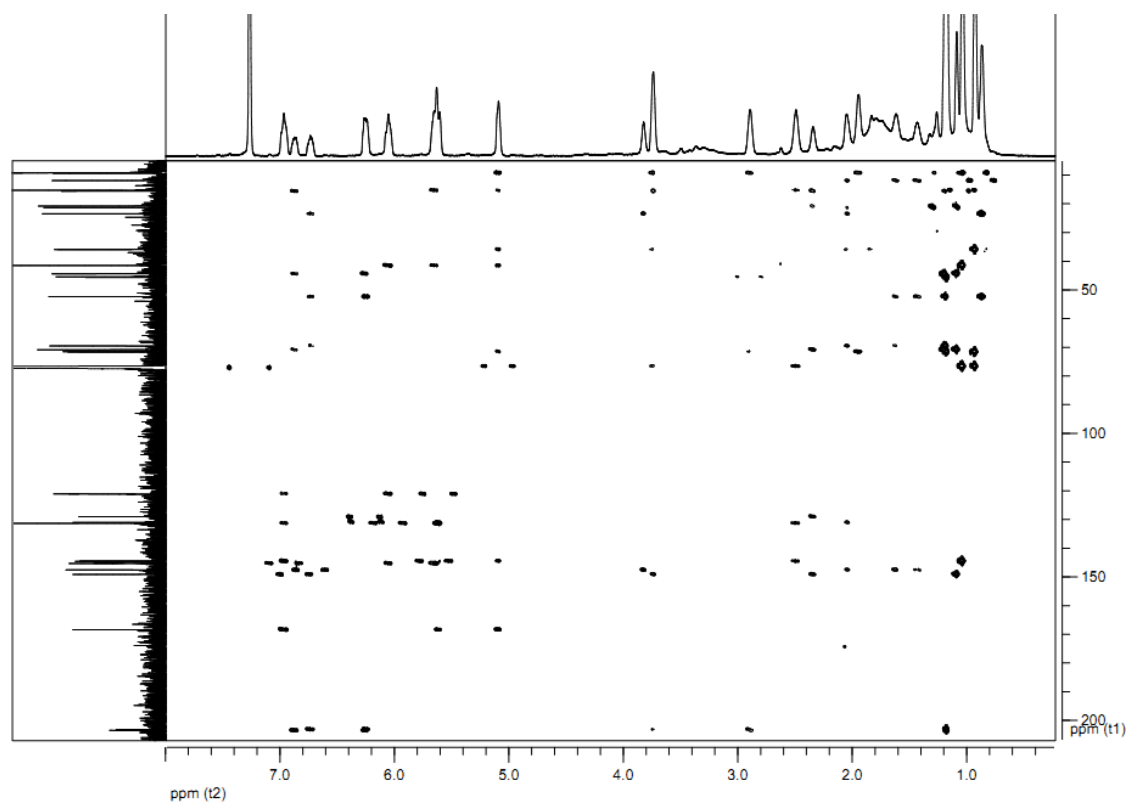

FIG AS33  $^1\text{H}$ - $^1\text{H}$ -ROESY spectrum (600  $\times$  600 MHz,  $\text{CDCl}_3$ ) of FXJ10762

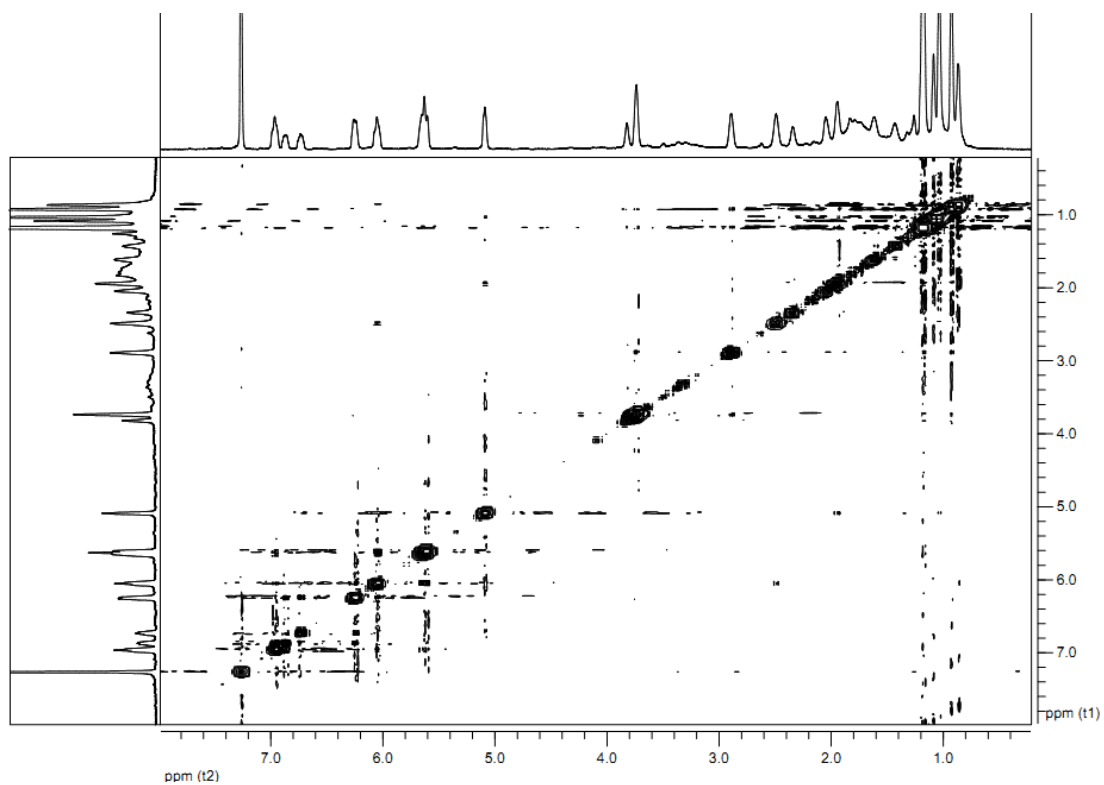

FIG AS34 HR-ESI-MS spectrum of FXJ10763

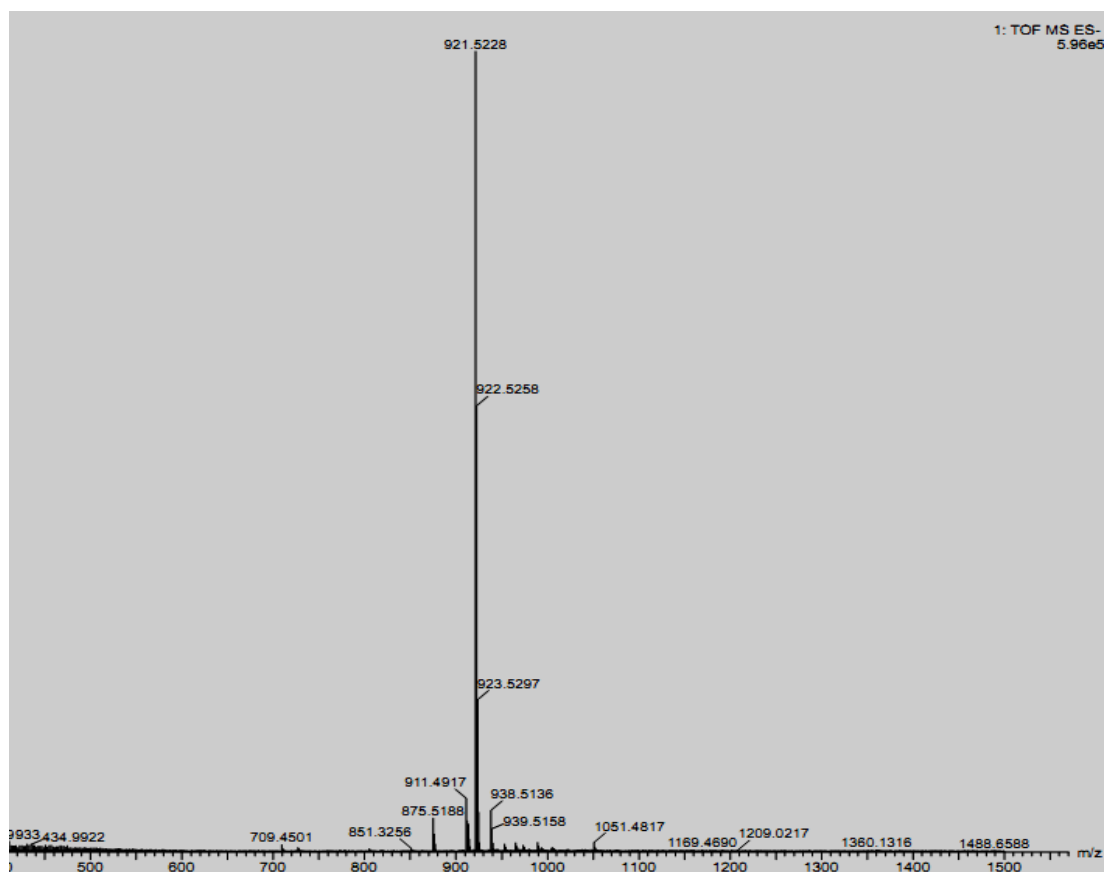



**FIG AS37** DEPT 135 spectrum (150 MHz,  $CDCl_3$ ) of **FXJ10763**

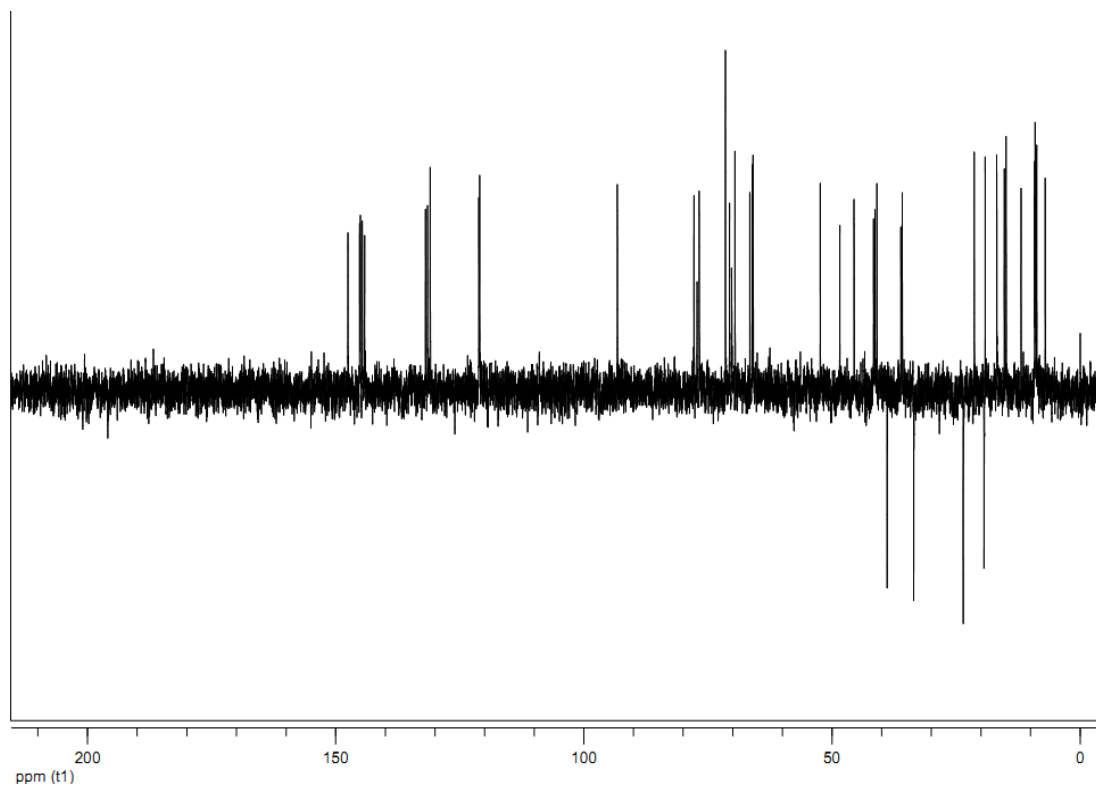

**FIG AS38**  $^1H$ - $^1H$ -COSY spectrum (600  $\times$  600 MHz,  $CDCl_3$ ) of **FXJ10763**

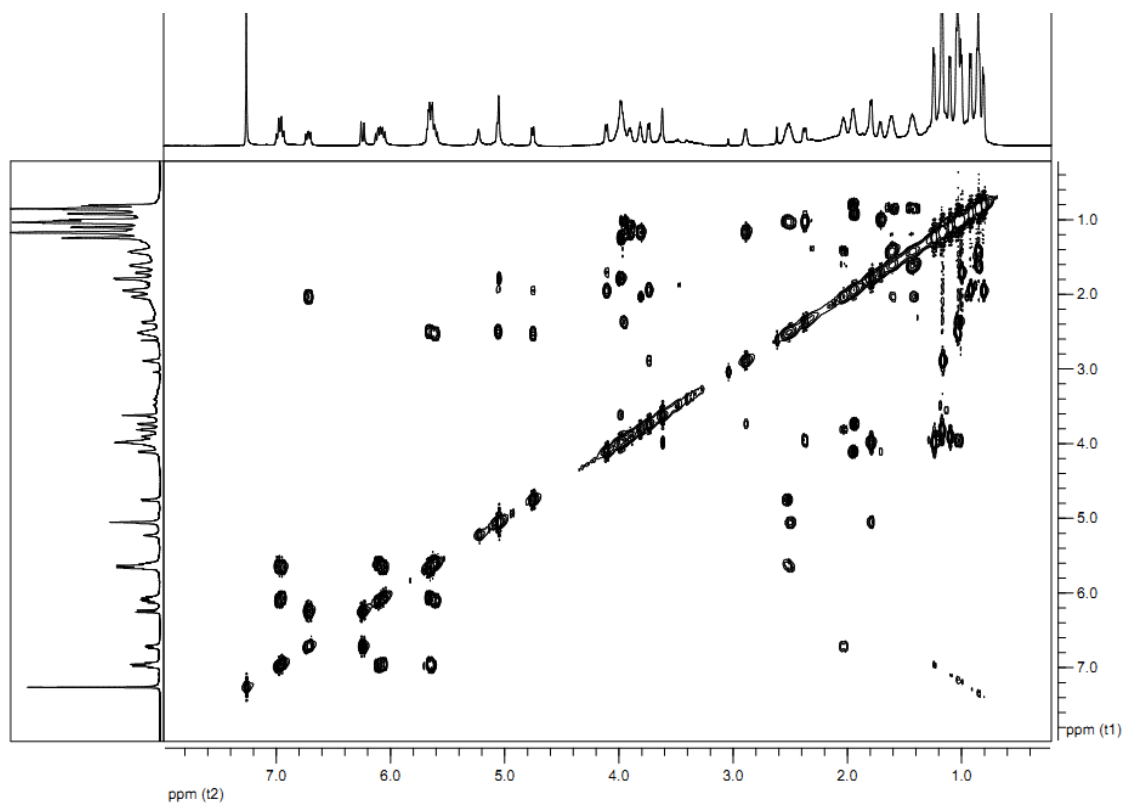

**FIG AS39**  $^1\text{H}$ - $^{13}\text{C}$ -HSQC spectrum (600  $\times$  150 MHz,  $\text{CDCl}_3$ ) of **FXJ10763**

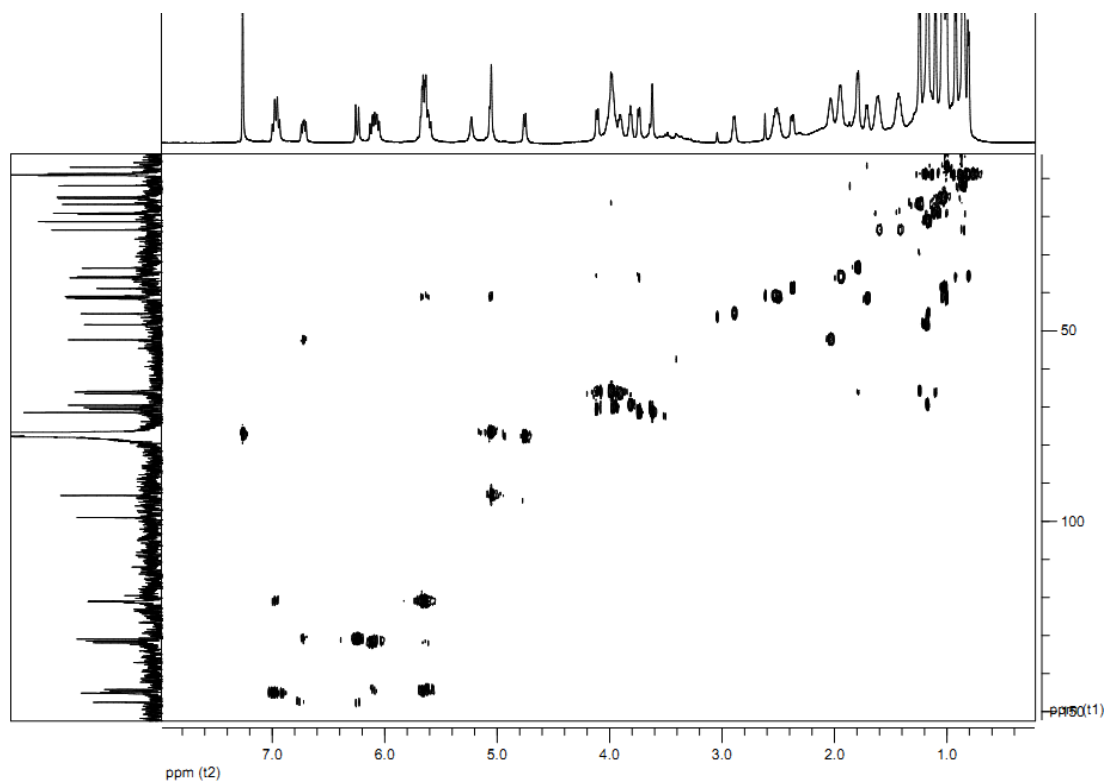

**FIG AS40**  $^1\text{H}$ - $^{13}\text{C}$ -HMBC spectrum (600  $\times$  150 MHz,  $\text{CDCl}_3$ ) of **FXJ10763**

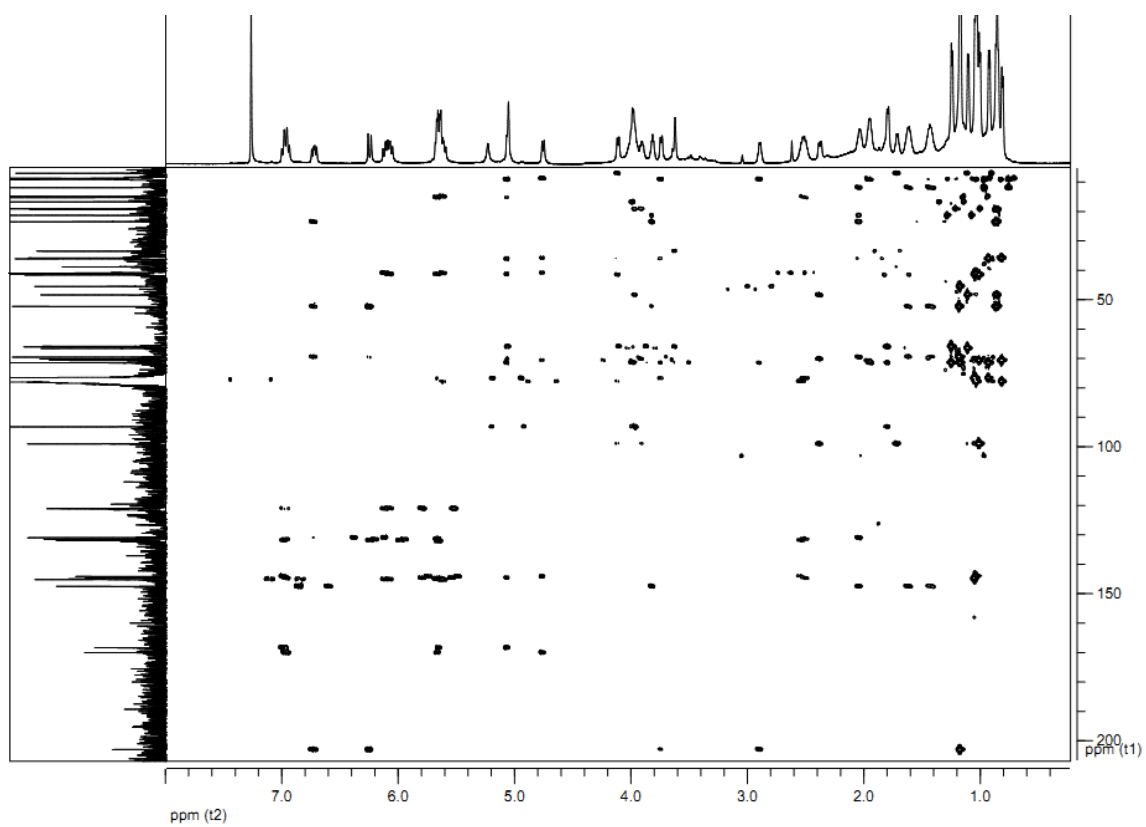

Supplement: AEM.03859-14_zam999116217so1.pdf [file AEM.03859-14_zam999116217so1.pdf]
